# Supplementary material
Source: publisher site journal article supplement (https://www.dovepress.com/get_supplementary_file.php?f=185875.xlsx)
Supplement: Supplementary file 1 [file get_supplementary_file.php]

## Sheet: Sheet1
Patient ID	Neoplasm Disease Stage American Joint Committee on Cancer Code	American Joint Committee on Cancer Metastasis Stage Code	American Joint Committee on Cancer Tumor Stage Code	Angiolymphatic Invasion	Birth from Initial Pathologic Diagnosis Date	Cancer Studies	Cancer Type	Cancer Type Detailed	Daily Alcohol	Days to Last Followup	Days to Sample Collection.	Days to Sample Procurement	Death from Initial Pathologic Diagnosis Date	Diagnosis Age	Did patient start adjuvant postoperative radiotherapy?	Disease Surgical Margin Status	Disease code	Ethnicity Category	Extracapsular spread pathologic	First Pathologic Diagnosis Biospecimen Acquisition Method Type	Form completion date	Hpv status ish	Hpv status p16	ICD-10 Classification	Informed consent verified	Initial Patient Weight	International Classification of Diseases for Oncology, Third Edition ICD-O-3 Histology Code	International Classification of Diseases for Oncology, Third Edition ICD-O-3 Site Code	Is FFPE	Last Alive Less Initial Pathologic Diagnosis Date Calculated Day Value	Longest Dimension	Lymph Node(s) Examined Number	Lymph node dissection method	Lymph node neck dissection indicator	Lymphomatous Extranodal Site Involvement Indicator	Neoadjuvant Therapy Type Administered Prior To Resection Text	Neoplasm American Joint Committee on Cancer Clinical Distant Metastasis M Stage	Neoplasm American Joint Committee on Cancer Clinical Group Stage	Neoplasm American Joint Committee on Cancer Clinical Primary Tumor T Stage	Neoplasm American Joint Committee on Cancer Clinical Regional Lymph Node N Stage	Neoplasm Disease Lymph Node Stage American Joint Committee on Cancer Code	Alcohol Consumption Frequency	Neoplasm Histologic Grade	Neoplasm Histologic Type Name	New Neoplasm Event Post Initial Therapy Indicator	Oct embedded	Oncotree Code	Other Patient ID	Other Sample ID
TCGA-BA-4074	Stage IVA	M0	T2		-25282	hnsc_tcga	Head and Neck Cancer	Head and Neck Squamous Cell Carcinoma	NA	NA	NA	NA	462	69		Positive	NA	NOT HISPANIC OR LATINO	Gross Extension	NA	2011-01-14			C02.9	YES	NA	1970-03-01	C02.9	NO	0	0.8	47	Modified Radical Neck Dissection	YES	NA	No	M0	Stage IVA	T3	N2c	N2c	NA	G3	Head & Neck Squamous Cell Carcinoma		NA	HNSC	a63ca97d-ef31-4118-9547-a6730967290f	7bc6b159-19b4-4711-961d-830bc9e56493
TCGA-BA-4075	Stage III	M0	T3		-17951	hnsc_tcga	Head and Neck Cancer	Head and Neck Squamous Cell Carcinoma	5	NA	NA	NA	283	49		Positive	NA	NOT HISPANIC OR LATINO		NA	2011-04-04			C02.9	YES	NA	1970-03-01	C02.9	NO	0	1	48	Modified Radical Neck Dissection	YES	NA	Yes	M0	Stage IVA	T4a	N1	N0	7	G2	Head & Neck Squamous Cell Carcinoma		NA	HNSC	6fa62461-e721-415a-8b0f-363b84292b82	4dc36c31-35d8-4263-b141-c734545540a9
TCGA-BA-4076			TX		-14405	hnsc_tcga	Head and Neck Cancer	Head and Neck Squamous Cell Carcinoma	NA	NA	NA	NA	415	39			NA	NOT HISPANIC OR LATINO	Gross Extension	NA	2010-12-10			C32.9	YES	NA	1970-03-01	C32.9	NO	0	0.8	NA	Functional (Limited) Neck Dissection	YES	NA	No	M0	Stage IVA	T3	N2c	NX	NA	G2	Head & Neck Squamous Cell Carcinoma		NA	HNSC	7de19081-d5fd-468c-ad0d-f6e3e8b2ad70	fd99fd83-4040-4738-8a5a-e42d36ecfe0e
TCGA-BA-4077	Stage IVA	M0	T4a		-16536	hnsc_tcga	Head and Neck Cancer	Head and Neck Squamous Cell Carcinoma	0	NA	NA	NA	1134	45		Negative	NA	NOT HISPANIC OR LATINO		NA	2011-04-04			C02.9	YES	NA	1970-03-01	C02.9	NO	0	0.7	0		YES	NA	Yes	M0	Stage IVB	T4b	N3	N0	0	G2	Head & Neck Squamous Cell Carcinoma		NA	HNSC	4bfbce2b-9d0b-4e8a-950f-fd8e0ba3e05a	327bbca7-fa25-4a92-be27-21a4c184c760
TCGA-BA-4078				NO	-30480	hnsc_tcga	Head and Neck Cancer	Head and Neck Squamous Cell Carcinoma	NA	NA	NA	NA	276	83			NA	NOT HISPANIC OR LATINO	Gross Extension	NA	2010-12-10			C32.9	YES	NA	1970-03-01	C32.9	NO	0	0.9	52	Radical Neck Dissection	YES	NA	No	M0	Stage IVA	T2	N2a		NA	G2	Head & Neck Squamous Cell Carcinoma		NA	HNSC	c7353d6a-82a2-4a0d-8cd4-8c8957943edb	2027ede3-13f5-40f6-bef6-16704981d676
TCGA-BA-5151	Stage IVA		T4a	NO	-26569	hnsc_tcga	Head and Neck Cancer	Head and Neck Squamous Cell Carcinoma	0	190	NA	NA	NA	72		Close	NA	NOT HISPANIC OR LATINO	No Extranodal Extension	NA	2011-01-27			C06.0	YES	NA	1970-03-01	C06.0	NO	0	1	33	Modified Radical Neck Dissection	YES	NA	No	M0	Stage IVA	T4a	N0	N0	0	G1	Head & Neck Squamous Cell Carcinoma		NA	HNSC	a55fb87d-f606-48a5-82f5-09eacbacf41b	63384a6a-9686-44ee-8c8f-22923968c9de
TCGA-BA-5152	Stage IVA	M0	T4a	NO	-20783	hnsc_tcga	Head and Neck Cancer	Head and Neck Squamous Cell Carcinoma	0	846	NA	NA	NA	56		Negative	NA	NOT HISPANIC OR LATINO	No Extranodal Extension	NA	2011-07-08			C14.8	YES	NA	1970-03-01	C14.8	NO	0	1	28	Functional (Limited) Neck Dissection	YES	NA	No	M0	Stage IVA	T4a	N0	N0	0	G2	Head & Neck Squamous Cell Carcinoma		NA	HNSC	01420c4e-6013-4d3f-87bd-a6cd9e3f8e87	9397390c-357c-4063-9771-4185b02d77db
TCGA-BA-5153			T2		-18743	hnsc_tcga	Head and Neck Cancer	Head and Neck Squamous Cell Carcinoma	0	NA	NA	NA	1762	51		Positive	NA	NOT HISPANIC OR LATINO		NA	2010-12-10			C09.9	YES	NA	1970-03-01	C09.9	NO	0	0.6	0		NO	NA	No	M0	Stage III	T2	N1	NX	0	G2	Head & Neck Squamous Cell Carcinoma		NA	HNSC	b3631718-9e0a-454c-bee1-8f36ebc509d8	2dc7070a-9c70-4bb1-9634-8c934bb9c8d1
TCGA-BA-5555	Stage IVA		T3	NO	-19956	hnsc_tcga	Head and Neck Cancer	Head and Neck Squamous Cell Carcinoma	0	186	NA	NA	NA	54		Negative	NA	NOT HISPANIC OR LATINO	No Extranodal Extension	NA	2011-04-04			C32.9	YES	NA	1970-03-01	C32.9	NO	0	0.8	68	Modified Radical Neck Dissection	YES	NA	No	M0	Stage IVA	T2	N2c	N2c	0	G2	Head & Neck Squamous Cell Carcinoma		NA	HNSC	8970f713-4a7a-4125-892c-6a34139371d8	2920ca1c-6035-4350-ada4-c60d485dbfff
TCGA-BA-5556	Stage II		T2	NO	-21444	hnsc_tcga	Head and Neck Cancer	Head and Neck Squamous Cell Carcinoma	2	179	NA	NA	NA	58			NA	NOT HISPANIC OR LATINO	No Extranodal Extension	NA	2011-04-04			C04.9	YES	NA	1970-03-01	C04.9	NO	0	0.7	81	Modified Radical Neck Dissection	YES	NA	No	M0	Stage II	T2	N0	N0	7	G3	Head & Neck Squamous Cell Carcinoma		NA	HNSC	70741b73-9683-42bd-87fc-6a021a70103b	c00eeddb-6ae2-48ba-8677-c174e579a724
TCGA-BA-5557	Stage III		T1	NO	-15247	hnsc_tcga	Head and Neck Cancer	Head and Neck Squamous Cell Carcinoma	0	242	NA	NA	NA	41		Negative	NA	HISPANIC OR LATINO	No Extranodal Extension	NA	2011-04-04			C14.8	YES	NA	1970-03-01	C14.8	NO	0	0.7	34	Modified Radical Neck Dissection	YES	NA	No	M0	Stage IVA	T2	N2	N1	0	G2	Head & Neck Squamous Cell Carcinoma		NA	HNSC	7e0575ce-670b-4035-8a90-4d35279707b2	67d75889-e868-41f2-8255-5d5d1aa0a854
TCGA-BA-5558			TX	NO	-23984	hnsc_tcga	Head and Neck Cancer	Head and Neck Squamous Cell Carcinoma	0	1636	NA	NA	NA	65			NA	NOT HISPANIC OR LATINO		NA	2011-04-04			C14.8	YES	NA	1970-03-01	C14.8	NO	0	0.6	37	Modified Radical Neck Dissection	YES	NA	No	M0	Stage IVA	T4a	N1	NX	0	G1	Head & Neck Squamous Cell Carcinoma		NA	HNSC	6a1aa50c-097c-4e04-8ddd-12d50f8a5ac2	eb749281-b3dc-43e4-812e-f5f5004a21ed
TCGA-BA-5559			TX		-26286	hnsc_tcga	Head and Neck Cancer	Head and Neck Squamous Cell Carcinoma	0	1747	NA	NA	NA	71		Positive	NA	NOT HISPANIC OR LATINO		NA	2011-04-05			C09.9	YES	NA	1970-03-01	C09.9	NO	0	0.8	25	Modified Radical Neck Dissection	YES	NA	No	M0	Stage IVA	T3	N2b	NX	0	G3	Head & Neck Squamous Cell Carcinoma		NA	HNSC	17b17d91-c3df-4b89-9c10-4db069aff656	fbea64f9-b46b-4af1-bfb2-1791d93977b6
TCGA-BA-6868			TX		-19608	hnsc_tcga	Head and Neck Cancer	Head and Neck Squamous Cell Carcinoma	NA	153	NA	NA	NA	53			NA	NOT HISPANIC OR LATINO		NA	2011-07-08			C32.9	YES	NA	1970-03-01	C32.9	NO	0	0.6	NA		NO	NA	No	M0	Stage IVB	T3	N3	NX	NA	G2	Head & Neck Squamous Cell Carcinoma		NA	HNSC	ed61706c-7fc1-4c5f-b473-7b0888ac5b73	ad04d034-7fff-4073-8c1f-97fac3d0bbdb
TCGA-BA-6869	Stage III		T3	NO	-22765	hnsc_tcga	Head and Neck Cancer	Head and Neck Squamous Cell Carcinoma	2	244	NA	NA	NA	62		Close	NA	NOT HISPANIC OR LATINO	No Extranodal Extension	NA	2011-07-08			C32.9	YES	NA	1970-03-01	C32.9	NO	0	1.5	80	Modified Radical Neck Dissection	YES	NA	No	M0	Stage III	T3	N0	N0	7	G2	Head & Neck Squamous Cell Carcinoma		NA	HNSC	fafd6f5b-1d76-4537-bd1c-e0bd7b4e2166	f4ed2c84-39f8-4ab3-8762-a9920acc2432
TCGA-BA-6870			TX		-22222	hnsc_tcga	Head and Neck Cancer	Head and Neck Squamous Cell Carcinoma	NA	NA	NA	NA	451	60			NA	NOT HISPANIC OR LATINO		NA	2011-07-08			C32.9	YES	NA	1970-03-01	C32.9	NO	0	0.7	NA		NO	NA	No	M1	Stage IVC	T3	N2c	NX	5	G2	Head & Neck Squamous Cell Carcinoma		NA	HNSC	730c3b27-24d5-4a80-b659-db54cd2bc4fa	5bf05a41-3a19-445b-96bd-439b9cac01eb
TCGA-BA-6871			TX		-27708	hnsc_tcga	Head and Neck Cancer	Head and Neck Squamous Cell Carcinoma	NA	63	NA	NA	NA	75			NA			NA	2011-07-08			C01	YES	NA	1970-03-01	C01.9	NO	0	1.2	NA		NO	NA	No	M0	Stage IVA	T3	N2b	NX	NA	G2	Head & Neck Squamous Cell Carcinoma		NA	HNSC	bd62a587-6fe1-47ce-918d-055f2b38bb0e	6c771242-929b-464e-a8b8-bcd84d17c16e
TCGA-BA-6872			TX		-17296	hnsc_tcga	Head and Neck Cancer	Head and Neck Squamous Cell Carcinoma	6	NA	NA	NA	384	47		Negative	NA	NOT HISPANIC OR LATINO		NA	2011-07-07			C04.9	YES	NA	1970-03-01	C04.9	NO	0	0.7	50	Functional (Limited) Neck Dissection	YES	NA	No	M0	Stage IVA	T3	N2c	NX	7	G2	Head & Neck Squamous Cell Carcinoma		NA	HNSC	3e5f451a-5882-4914-ae1a-95c898c2bcca	04107a58-667d-4712-b972-61837eff6029
TCGA-BA-6873	Stage IVA		T4a	YES	-10512	hnsc_tcga	Head and Neck Cancer	Head and Neck Squamous Cell Carcinoma	0	113	NA	NA	NA	28		Close	NA	HISPANIC OR LATINO	Gross Extension	NA	2011-07-08			C02.9	YES	NA	1970-03-01	C02.9	NO	0	0.8	48	Functional (Limited) Neck Dissection	YES	NA	No	M0	Stage IVA	T2	N2b	N2b	0	G2	Head & Neck Squamous Cell Carcinoma		NA	HNSC	bf6b931e-cb2e-4cc0-b603-e9fc71fdc509	3304f433-c04c-4d5e-9ae7-ac9488879329
TCGA-BA-7269	Stage III		T2	NO	-22609	hnsc_tcga	Head and Neck Cancer	Head and Neck Squamous Cell Carcinoma	2	236	NA	NA	NA	61		Negative	NA	NOT HISPANIC OR LATINO	No Extranodal Extension	NA	2011-11-10			C02.9	YES	NA	1970-03-01	C02.9	NO	0	1.2	17	Functional (Limited) Neck Dissection	YES	NA	No	M0	Stage III	T2	N1	N1	7	G1	Head & Neck Squamous Cell Carcinoma		NA	HNSC	eb611a76-eecf-452c-bfbe-ab49b362f49c	69c35309-ae0a-4596-bd6e-f82f1845452c
TCGA-BA-A4IF		MX	TX		-21635	hnsc_tcga	Head and Neck Cancer	Head and Neck Squamous Cell Carcinoma	NA	523	483	NA	NA	59	YES		NA	NOT HISPANIC OR LATINO		NA	2013-01-17	Negative	Negative	C10.3	YES	170	1971-03-01	C10.3	NO	0	NA	NA		NO	NA	No	M0	Stage IVA	T4	N0	NX	NA	G2	Head & Neck Squamous Cell Carcinoma	YES	FALSE	HNSC	28D2FD8E-ABE9-4EA3-87E4-4F2B61A33C90	5EEA7C58-96B4-426B-9685-15599E534730
TCGA-BA-A4IG		MX	T1	NO	-28402	hnsc_tcga	Head and Neck Cancer	Head and Neck Squamous Cell Carcinoma	NA	519	457	NA	NA	77	YES	Negative	NA	NOT HISPANIC OR LATINO	No Extranodal Extension	NA	2013-01-17			C10.9	YES	240	1970-03-01	C10.9	NO	0	NA	67	Functional (Limited) Neck Dissection	YES	NA	No	M0	Stage IVA	T2	N2	NX	NA	G3	Head & Neck Squamous Cell Carcinoma	NO	FALSE	HNSC	54B295D4-6315-4416-BDE7-A221859F965C	CE469C00-B5C0-4D7C-875B-092C5B6AC289
TCGA-BA-A4IH		M0	T2	YES	-21094	hnsc_tcga	Head and Neck Cancer	Head and Neck Squamous Cell Carcinoma	4	201	97	NA	NA	57	YES	Close	NA	NOT HISPANIC OR LATINO	No Extranodal Extension	NA	2013-01-17	Positive	Positive	C10.9	YES	380	1983-03-01	C10.9	NO	0	NA	39	Functional (Limited) Neck Dissection	YES	NA	No	M0	Stage IVA	T2	N2b	N1	7	G3	Head & Neck Squamous Cell Carcinoma Basaloid Type	NO	FALSE	HNSC	BD75D8EE-916B-4ABC-BF33-BCE6A4217076	F87EFB5E-24F5-4D2B-B6B3-987BBDA30E03
TCGA-BA-A4II	Stage II	M0	T2	NO	-17011	hnsc_tcga	Head and Neck Cancer	Head and Neck Squamous Cell Carcinoma	2	603	498	NA	NA	46	NO	Negative	NA	NOT HISPANIC OR LATINO	No Extranodal Extension	NA	2013-01-17			C10.9	YES	190	1970-03-01	C10.9	NO	0	NA	80	Functional (Limited) Neck Dissection	YES	NA	No	M0	Stage I	T1	N0	N0	NA	G1	Head & Neck Squamous Cell Carcinoma	YES	FALSE	HNSC	2855BF40-E5E1-4519-B47A-327BFC275279	81BBC439-0C8C-4D39-BEF2-03901B31C50E
TCGA-BA-A6D8	Stage IVA	M0	T4a	YES	-21778	hnsc_tcga	Head and Neck Cancer	Head and Neck Squamous Cell Carcinoma	NA	513	452	NA	NA	59	YES	Positive	NA		Microscopic Extension	NA	2013-07-16	Negative	Negative	C04.9	YES	190	1970-03-01	C04.9	NO	0	NA	77	Modified Radical Neck Dissection	YES	NA	No	M0	Stage IVA	T4a	N2c	N2c	NA	G2	Head & Neck Squamous Cell Carcinoma	NO	FALSE	HNSC	B39C64BB-122D-44B3-9672-D0DC8468CA93	7196F5A5-F79A-49AE-91AA-E9B7378D76CC
TCGA-BA-A6DA	Stage IVA	M0	T4a	YES	-15004	hnsc_tcga	Head and Neck Cancer	Head and Neck Squamous Cell Carcinoma	0	351	366	NA	NA	41	YES	Close	NA	NOT HISPANIC OR LATINO	Microscopic Extension	NA	2013-07-16	Negative	Positive	C32.1	YES	250	1970-03-01	C32.1	NO	0	NA	87	Modified Radical Neck Dissection	YES	NA	No	M0	Stage IVA	T4a	N2c	N2c	0	G2	Head & Neck Squamous Cell Carcinoma		FALSE	HNSC	17885905-280F-40FA-943E-346ED45403EA	8B80B922-B00F-4CDA-92A2-49C357AEA89D
TCGA-BA-A6DB	Stage I	M0	T1	NO	-8967	hnsc_tcga	Head and Neck Cancer	Head and Neck Squamous Cell Carcinoma	0	216	331	NA	NA	24	NO	Negative	NA	NOT HISPANIC OR LATINO		NA	2013-07-16	Negative	Negative	C02.9	YES	130	1971-03-01	C02.9	NO	0	NA	24	Functional (Limited) Neck Dissection	YES	NA	No	M0	Stage II	T2	N0	N0	0	G1	Head & Neck Squamous Cell Carcinoma	YES	FALSE	HNSC	207C8A26-1A2D-47D9-8DB8-A25A7FD8655A	30BBBD22-70F2-469D-A571-45CC1F48BCB0
TCGA-BA-A6DD	Stage IVA	M0	T4a	NO	-16401	hnsc_tcga	Head and Neck Cancer	Head and Neck Squamous Cell Carcinoma	2	NA	113	NA	173	44	YES	Positive	NA	NOT HISPANIC OR LATINO	No Extranodal Extension	NA	2013-07-17	Negative	Negative	C04.9	YES	270	1971-03-01	C04.9	NO	0	NA	42	Radical Neck Dissection	YES	NA	No	M0	Stage IVA	T4a	N2c	N2c	7	G2	Head & Neck Squamous Cell Carcinoma	YES	FALSE	HNSC	C4060CA5-33E0-4C83-B91C-742D75059BDC	9A153C08-E5D8-4C4C-82AB-C7072AF90ACB
TCGA-BA-A6DE	Stage II	M0	T2	NO	-25874	hnsc_tcga	Head and Neck Cancer	Head and Neck Squamous Cell Carcinoma	1	182	121	NA	NA	70	NO	Negative	NA	NOT HISPANIC OR LATINO		NA	2013-07-17	Negative	Negative	C02.9	YES	160	1971-03-01	C02.9	NO	0	NA	73	Functional (Limited) Neck Dissection	YES	NA	No	M0	Stage III	T3	N0	N0	6	G2	Head & Neck Squamous Cell Carcinoma	NO	FALSE	HNSC	116AD004-929D-4C8D-8EEE-883D132E0FE5	EEC2369A-E60D-428F-A3F4-E9AC8ED9B3DB
TCGA-BA-A6DG		MX	TX		-18052	hnsc_tcga	Head and Neck Cancer	Head and Neck Squamous Cell Carcinoma	4	NA	471	NA	69	49	YES		NA	NOT HISPANIC OR LATINO		NA	2013-07-17	Negative	Negative	C02.9	YES	170	1970-03-01	C02.9	NO	0	NA	NA		NO	NA	No	M0	Stage IVA	T4a	N2b	NX	7	G2	Head & Neck Squamous Cell Carcinoma	NO	FALSE	HNSC	B7AC2F06-012A-436E-AFDE-7E4D653C84D9	0CA390EF-7F27-40E7-AD72-132356BCA006
TCGA-BA-A6DI		M0	TX		-22857	hnsc_tcga	Head and Neck Cancer	Head and Neck Squamous Cell Carcinoma	2	NA	414	NA	336	62	YES		NA	NOT HISPANIC OR LATINO		NA	2013-07-17	Negative	Negative	C32.9	YES	60	1971-03-01	C32.9	NO	0	NA	NA		NO	NA	No	M0	Stage III	T3	N0	NX	7	G2	Head & Neck Squamous Cell Carcinoma	YES	FALSE	HNSC	CB78EFB3-BC29-4DE7-9128-FDC4F9539B48	E7A7E296-3F1B-49F5-BBAA-082F918D080D
TCGA-BA-A6DJ	Stage IVA	M0	T4a	YES	-22967	hnsc_tcga	Head and Neck Cancer	Head and Neck Squamous Cell Carcinoma	0	314	388	NA	NA	62	YES	Close	NA	NOT HISPANIC OR LATINO	No Extranodal Extension	NA	2013-07-17	Negative	Negative	C03.9	YES	360	1971-03-01	C03.9	NO	0	NA	101	Modified Radical Neck Dissection	YES	NA	No	M0	Stage IVA	T4	N2b	N2c	0	G2	Head & Neck Squamous Cell Carcinoma	YES	FALSE	HNSC	0DE19185-3517-4E30-925B-7EB1F5079EC2	4210FFEE-2A83-4F05-8935-2687503C83D4
TCGA-BA-A6DL		M0	T0		-21886	hnsc_tcga	Head and Neck Cancer	Head and Neck Squamous Cell Carcinoma	3	294	228	NA	NA	59	NO		NA	NOT HISPANIC OR LATINO		NA	2013-07-17	Negative	Negative	C10.9	YES	140	1970-03-01	C10.9	NO	0	NA	NA		NO	NA	No	M0	Stage III	T3	N0	N0	7	G2	Head & Neck Squamous Cell Carcinoma	NO	FALSE	HNSC	C9A36EB5-AC3E-424E-BC2E-303DE7105957	BD90F967-84DD-48CD-AEC0-9DE9A76DF7A9
TCGA-BA-A8YP	Stage IVB	M0	T4a	YES	-18355	hnsc_tcga	Head and Neck Cancer	Head and Neck Squamous Cell Carcinoma	1	142	65	NA	NA	50	YES	Positive	NA	NOT HISPANIC OR LATINO	Microscopic Extension	NA	2014-03-13	Negative	Negative	C10.9	YES	290	1971-03-01	C10.9	NO	0	NA	66	Radical Neck Dissection	YES	NA	No	M0	Stage IVB	T4	N3	N3	6	G2	Head & Neck Squamous Cell Carcinoma	NO	FALSE	HNSC	A2D42990-747C-4618-88DD-E2DECE8E566F	4A339708-153A-4780-A265-70557765A754
TCGA-BB-4217	Stage IVA	M0	T4a		-25020	hnsc_tcga	Head and Neck Cancer	Head and Neck Squamous Cell Carcinoma	10	187	NA	NA	NA	68		Negative	NA	NOT HISPANIC OR LATINO		NA	2011-12-22			C32.9	YES	NA	1970-03-01	C32.9	NO	0	0.9	51		YES	NA	No	M0	Stage IVA	T4a	N2c	N2c	7	G3	Head & Neck Squamous Cell Carcinoma		NA	HNSC	248fa778-0758-4681-a31f-371ea8d376e6	b9427fad-04aa-4e73-99ba-ccde04e4978b
TCGA-BB-4223	Stage IVA	M0	T2		-17608	hnsc_tcga	Head and Neck Cancer	Head and Neck Squamous Cell Carcinoma	NA	2878	NA	NA	NA	48		Negative	NA	NOT HISPANIC OR LATINO		NA	2011-12-22			C09.9	YES	NA	1970-03-01	C09.9	NO	0	0.7	NA	Modified Radical Neck Dissection	YES	NA	No	M0	Stage IVA	T3	N2b	N2b	NA	G3	Head & Neck Squamous Cell Carcinoma		NA	HNSC	05f01280-bf77-4682-a7a8-20dd0eac77bd	82db742d-885d-4788-b509-474715ae183b
TCGA-BB-4224	Stage IVA		T2		-19119	hnsc_tcga	Head and Neck Cancer	Head and Neck Squamous Cell Carcinoma	1	278	NA	NA	NA	52		Negative	NA	NOT HISPANIC OR LATINO		NA	2011-12-22			C02.9	YES	NA	1970-03-01	C02.9	NO	0	0.6	51		YES	NA	No	M0	Stage III	T3	N0	N2b	1	G2	Head & Neck Squamous Cell Carcinoma		NA	HNSC	58574e35-8a30-4207-b127-59fff7c87a43	077acd68-8c30-41a6-bb7e-5b014866b807
TCGA-BB-4225			TX		-26687	hnsc_tcga	Head and Neck Cancer	Head and Neck Squamous Cell Carcinoma	1	140	NA	NA	NA	73			NA	NOT HISPANIC OR LATINO		NA	2012-01-04			C01	YES	NA	1970-03-01	C01.9	NO	0	0.7	NA		NO	NA	No	M0	Stage IVA	T3	N2c	NX	1	G3	Head & Neck Squamous Cell Carcinoma		NA	HNSC	c1f50a22-38df-41cc-a1f4-f7985504a7ac	ac42070b-f4d6-47be-96aa-a713d66a0072
TCGA-BB-4227	Stage IVA		T4a		-24322	hnsc_tcga	Head and Neck Cancer	Head and Neck Squamous Cell Carcinoma	3	133	NA	NA	NA	66		Negative	NA	NOT HISPANIC OR LATINO		NA	2011-12-27			C13.9	YES	NA	1970-03-01	C13.9	NO	0	0.7	25		YES	NA	No	M0	Stage IVA	T4a	N2b	N2b	7	G2	Head & Neck Squamous Cell Carcinoma		NA	HNSC	b8ac8500-abcd-40c4-9c24-7af557fd260a	a6748675-5433-4f39-a578-9a1ddb8bb1b3
TCGA-BB-8596	Stage IVA	MX	T4a		-25408	hnsc_tcga	Head and Neck Cancer	Head and Neck Squamous Cell Carcinoma	1	2161	NA	NA	NA	69	YES	Negative	NA	NOT HISPANIC OR LATINO		NA	2012-09-26			C13.9	YES	NA	1970-03-01	C13.9	NO	0	0.6	NA		NO	NA	No	M0	Stage IVA	T4	N1	NX	7	G3	Head & Neck Squamous Cell Carcinoma		NA	HNSC	5646f226-e2ce-45ef-8aa2-4841ec6b56b0	226992b4-f81f-49f5-a1da-37ab1742779b
TCGA-BB-8601	Stage III	MX	T3	NO	-30721	hnsc_tcga	Head and Neck Cancer	Head and Neck Squamous Cell Carcinoma	0	624	NA	NA	NA	84	NO	Negative	NA	NOT HISPANIC OR LATINO		NA	2012-09-26			C04.9	YES	NA	1970-03-01	C04.9	NO	0	0.8	16	Functional (Limited) Neck Dissection	YES	NA	No	M0	Stage II	T2	N0	N1	0	G2	Head & Neck Squamous Cell Carcinoma	YES	NA	HNSC	360726f4-9b50-422d-b498-5acbbc3713ae	5902db82-e9a3-439b-aa7c-9ea8b71e28ec
TCGA-BB-A5HU	Stage IVA	M0	T4	NO	-17502	hnsc_tcga	Head and Neck Cancer	Head and Neck Squamous Cell Carcinoma	0	383	246	NA	NA	47	YES	Negative	NA	NOT HISPANIC OR LATINO	Gross Extension	NA	2014-09-18	Negative		C06.9	YES	160	1970-03-01	C06.9	NO	0	NA	30	Modified Radical Neck Dissection	YES	NA	No	M0	Stage IVA	T4	N2b	N2b	0	G2	Head & Neck Squamous Cell Carcinoma	NO	FALSE	HNSC	F35A0655-7504-4BD6-A9F3-6F3E59FD84B1	2D9E869F-D10E-43A2-BC28-F4720CB201F5
TCGA-BB-A5HY	Stage IVA	M0	T3		-23640	hnsc_tcga	Head and Neck Cancer	Head and Neck Squamous Cell Carcinoma	NA	308	141	NA	NA	64	YES	Negative	NA	NOT HISPANIC OR LATINO	Gross Extension	NA	2014-09-18	Negative		C13.9	YES	60	1970-03-01	C13.9	NO	0	NA	24	Functional (Limited) Neck Dissection	YES	NA	No	M0	Stage IVA	T3	N2b	N2b	NA	G3	Head & Neck Squamous Cell Carcinoma	YES	FALSE	HNSC	0394060D-010E-405F-983D-DB525F01F2C3	5C2B4403-CDD4-4550-BA01-D8EBAD9FCBC8
TCGA-BB-A5HZ	Stage IVA	M0	T4a	NO	-23906	hnsc_tcga	Head and Neck Cancer	Head and Neck Squamous Cell Carcinoma	0	350	213	NA	NA	65	YES	Negative	NA	NOT HISPANIC OR LATINO	Gross Extension	NA	2014-09-18			C06.9	YES	210	1970-03-01	C06.9	NO	0	NA	39	Functional (Limited) Neck Dissection	YES	NA	No	M0	Stage IVA	T4	N1	N1	0	G2	Head & Neck Squamous Cell Carcinoma	NO	FALSE	HNSC	A88D6F62-88DA-40C4-BC16-7FE58F038B8C	2321B0FD-B985-4A37-B45E-49F6E7B68A50
TCGA-BB-A6UO	Stage IVA	MX	T4a	NO	-22506	hnsc_tcga	Head and Neck Cancer	Head and Neck Squamous Cell Carcinoma	NA	NA	201	NA	268	61	YES	Close	NA	NOT HISPANIC OR LATINO	Gross Extension	NA	2014-09-23			C02.9	YES	80	1970-03-01	C02.9	NO	0	NA	28	Radical Neck Dissection	YES	NA	No	MX	Stage IVA	T3	N2	N2b	NA	G2	Head & Neck Squamous Cell Carcinoma	YES	FALSE	HNSC	CCD672DF-44D4-421F-8727-0A05E513B6C8	BC127D71-69B1-4DF0-9AE2-AAFB1B6E091B
TCGA-C9-A47Z	Stage III	M0	T2		-26592	hnsc_tcga	Head and Neck Cancer	Head and Neck Squamous Cell Carcinoma	NA	5	446	NA	NA	72	NO		NA	NOT HISPANIC OR LATINO		NA	2013-03-11			C02.9	YES	270	1970-03-01	C02.9	NO	0	NA	2		NO	NA	No	M0	Stage III	T2	N1	N1	NA	G1	Head & Neck Squamous Cell Carcinoma	NO	TRUE	HNSC	64A195F6-2212-4E81-BCCC-E39C77A10908	83503A2D-C190-421B-BDC4-A72BEE0E88EA
TCGA-C9-A480	Stage III	M0	T3		-16567	hnsc_tcga	Head and Neck Cancer	Head and Neck Squamous Cell Carcinoma	NA	4	432	NA	NA	45	NO		NA	NOT HISPANIC OR LATINO		NA	2013-03-11			C02.9	YES	260	1970-03-01	C02.9	NO	0	NA	NA		NO	NA	No	M0	Stage III	T3	N0	N0	NA	G1	Head & Neck Squamous Cell Carcinoma	NO	TRUE	HNSC	E8F0CD72-E423-45E0-AD1E-83AA7FB354E3	60411F5F-15EE-4FE8-AEB0-30A740B746E3
TCGA-CN-4722	Stage II		T2	NO	-22299	hnsc_tcga	Head and Neck Cancer	Head and Neck Squamous Cell Carcinoma	NA	193	NA	NA	NA	61		Negative	NA	NOT HISPANIC OR LATINO	No Extranodal Extension	NA	2011-04-27	Negative		C32.9	YES	NA	1970-03-01	C32.9	NO	0	0.9	53		YES	NA	No	M0	Stage II	T2	N0	N0	NA	G1	Head & Neck Squamous Cell Carcinoma		NA	HNSC	b64bfca1-033c-4501-a900-103ac105c084	6e767fc9-0f5a-49ec-999a-cda2daeba6ff
TCGA-CN-4723	Stage IVA		T4a	NO	-24815	hnsc_tcga	Head and Neck Cancer	Head and Neck Squamous Cell Carcinoma	NA	412	NA	NA	NA	67		Negative	NA	NOT HISPANIC OR LATINO	No Extranodal Extension	NA	2011-04-27			C32.9	YES	NA	1970-03-01	C32.9	NO	0	1	55	Modified Radical Neck Dissection	YES	NA	No	M0	Stage IVA	T4a	N0	N0	NA	G2	Head & Neck Squamous Cell Carcinoma		NA	HNSC	96163e94-4a14-4907-a57a-cfab4caf19a4	f4a14404-3545-44fc-953d-e441139e7fda
TCGA-CN-4725	Stage II		T2	NO	-22171	hnsc_tcga	Head and Neck Cancer	Head and Neck Squamous Cell Carcinoma	NA	310	NA	NA	NA	60		Negative	NA	NOT HISPANIC OR LATINO	No Extranodal Extension	NA	2011-04-27	Negative	Negative	C02.9	YES	NA	1970-03-01	C02.9	NO	0	1	16	Modified Radical Neck Dissection	YES	NA	No	M0	Stage II	T2	N0	N0	NA	G2	Head & Neck Squamous Cell Carcinoma		NA	HNSC	3be2ace5-1c2a-49e9-8da9-ceed6119530b	dd42ab2f-e936-4ace-93d8-60375e03f2fe
TCGA-CN-4726	Stage IVA		T3	YES	-25194	hnsc_tcga	Head and Neck Cancer	Head and Neck Squamous Cell Carcinoma	NA	NA	NA	NA	142	68		Positive	NA	NOT HISPANIC OR LATINO	Microscopic Extension	NA	2011-04-28	Negative	Negative	C06.0	YES	NA	1970-03-01	C06.0	NO	0	1.2	14	Functional (Limited) Neck Dissection	YES	NA	No	M0	Stage IVA	T3	N2	N2b	NA	G2	Head & Neck Squamous Cell Carcinoma		NA	HNSC	5da2dbde-735b-4f05-b6d7-76de54d6d6ac	1c3f3eb4-2416-4e5d-914f-411d976f2553
TCGA-CN-4727	Stage IVA		T4a	NO	-20748	hnsc_tcga	Head and Neck Cancer	Head and Neck Squamous Cell Carcinoma	NA	194	NA	NA	NA	56		Negative	NA	NOT HISPANIC OR LATINO	No Extranodal Extension	NA	2011-04-28	Negative	Negative	C32.9	YES	NA	1970-03-01	C32.9	NO	0	1	37	Functional (Limited) Neck Dissection	YES	NA	No	M0	Stage IVA	T4a	N0	N0	NA	G2	Head & Neck Squamous Cell Carcinoma		NA	HNSC	12d05e8f-8d13-47c1-b713-2250f6abcef9	f102aef0-94b8-4d26-8055-35b76da9dd5f
TCGA-CN-4728	Stage IVA		T3	YES	-20660	hnsc_tcga	Head and Neck Cancer	Head and Neck Squamous Cell Carcinoma	7	325	NA	NA	NA	56		Negative	NA	NOT HISPANIC OR LATINO	No Extranodal Extension	NA	2011-04-28		Negative	C14.8	YES	NA	1970-03-01	C14.8	NO	0	0.7	58	Functional (Limited) Neck Dissection	YES	NA	No	M0	Stage IVA	T2	N2	N2b	7	G2	Head & Neck Squamous Cell Carcinoma		NA	HNSC	7152edc3-0a5b-4aed-b0c6-63f913dff272	c3ae4cb5-6058-4b3b-820d-5d255f1f7e33
TCGA-CN-4729	Stage III		T2	YES	-26713	hnsc_tcga	Head and Neck Cancer	Head and Neck Squamous Cell Carcinoma	3	156	NA	NA	NA	73		Negative	NA	NOT HISPANIC OR LATINO	Microscopic Extension	NA	2011-04-28			C14.8	YES	NA	1970-03-01	C14.8	NO	0	0.9	24	Functional (Limited) Neck Dissection	YES	NA	No	M0	Stage IVA	T4a	N0	N1	7	G2	Head & Neck Squamous Cell Carcinoma		NA	HNSC	2fc960bd-01b0-422d-ad33-34520fa3df0e	1da8fe25-aee2-45fd-a1f3-3239a42e54b2
TCGA-CN-4730	Stage IVA		T4a	NO	-22828	hnsc_tcga	Head and Neck Cancer	Head and Neck Squamous Cell Carcinoma	NA	343	NA	NA	NA	62		Negative	NA	NOT HISPANIC OR LATINO	No Extranodal Extension	NA	2011-04-28			C14.8	YES	NA	1970-03-01	C14.8	NO	0	1	37	Functional (Limited) Neck Dissection	YES	NA	No	M0	Stage IVA	T4a	N2b	N1	NA	G2	Head & Neck Squamous Cell Carcinoma		NA	HNSC	35c1f2c6-771c-4533-82df-f8e2ec7107d7	8270c53e-f2cf-4f57-a1ac-a8ba978cc1c8
TCGA-CN-4731	Stage IVA		T4a	YES	-23194	hnsc_tcga	Head and Neck Cancer	Head and Neck Squamous Cell Carcinoma	NA	383	NA	NA	NA	63		Negative	NA	NOT HISPANIC OR LATINO	Microscopic Extension	NA	2011-04-29	Negative	Negative	C14.8	YES	NA	1970-03-01	C14.8	NO	0	0.7	52	Functional (Limited) Neck Dissection	YES	NA	No	M0	Stage IVA	T4a	N2	N2c	NA	G3	Head & Neck Squamous Cell Carcinoma		NA	HNSC	50e25a4b-2eb2-4770-9a2d-8922a1e0ab56	cd4e9d8c-b1f9-486a-adcd-bd4b77a50326
TCGA-CN-4733	Stage III		T1	YES	-22561	hnsc_tcga	Head and Neck Cancer	Head and Neck Squamous Cell Carcinoma	NA	523	NA	NA	NA	61		Negative	NA	NOT HISPANIC OR LATINO	No Extranodal Extension	NA	2011-08-17	Negative	Negative	C02.9	YES	NA	1970-03-01	C02.9	NO	0	0.9	29	Modified Radical Neck Dissection	YES	NA	No	M0	Stage I	T1	N0	N1	NA	G3	Head & Neck Squamous Cell Carcinoma		NA	HNSC	dedd71b4-8537-4947-839e-90aceddd0893	a1fd1c9d-c763-488a-8649-ff069f56d2be
TCGA-CN-4734	Stage II		T2	YES	-25753	hnsc_tcga	Head and Neck Cancer	Head and Neck Squamous Cell Carcinoma	NA	227	NA	NA	NA	70		Negative	NA	NOT HISPANIC OR LATINO	No Extranodal Extension	NA	2011-04-29	Negative	Negative	C06.0	YES	NA	1970-03-01	C06.0	NO	0	0.7	36	Functional (Limited) Neck Dissection	YES	NA	No	M0	Stage II	T2	N0	N0	NA	G2	Head & Neck Squamous Cell Carcinoma		NA	HNSC	b80fdc9a-341d-4277-9664-8e8f770d9ddd	20614787-1e55-40f0-88de-080640eb8a03
TCGA-CN-4735	Stage IVA		T3	NO	-19107	hnsc_tcga	Head and Neck Cancer	Head and Neck Squamous Cell Carcinoma	5	369	NA	NA	NA	52		Negative	NA	NOT HISPANIC OR LATINO	No Extranodal Extension	NA	2011-04-29	Negative	Negative	C32.9	YES	NA	1970-03-01	C32.9	NO	0	0.7	70	Modified Radical Neck Dissection	YES	NA	No	M0	Stage IVA	T3	N2b	N2b	7	G3	Head & Neck Squamous Cell Carcinoma		NA	HNSC	fe844945-3ea9-449e-993c-df392fabcfd0	fbb300fa-8793-42da-a68e-4570ae2e5186
TCGA-CN-4736			T1	NO	-25683	hnsc_tcga	Head and Neck Cancer	Head and Neck Squamous Cell Carcinoma	2	NA	NA	NA	395	70		Negative	NA	NOT HISPANIC OR LATINO	No Extranodal Extension	NA	2011-05-02			C02.9	YES	NA	1970-03-01	C02.9	NO	0	1	NA		NO	NA	No	M0	Stage II	T2	N0	NX	7	G2	Head & Neck Squamous Cell Carcinoma		NA	HNSC	0fb3e5ff-54f0-43c5-9322-541bb7825e7f	6db0b6ee-23b3-43bf-8aa9-fdf641afc673
TCGA-CN-4737	Stage IVA		T2	YES	-7301	hnsc_tcga	Head and Neck Cancer	Head and Neck Squamous Cell Carcinoma	NA	240	NA	NA	NA	19		Negative	NA	NOT HISPANIC OR LATINO	No Extranodal Extension	NA	2011-05-02	Negative	Negative	C02.9	YES	NA	1970-03-01	C02.9	NO	0	0.9	36	Functional (Limited) Neck Dissection	YES	NA	No	M0	Stage II	T2	N0	N2b	NA	G2	Head & Neck Squamous Cell Carcinoma		NA	HNSC	1f744ada-6de1-446d-b62c-76a7fc8b40af	ba5d40f5-56a2-438b-92b8-6eb7db6d6afa
TCGA-CN-4738	Stage IVA	M0	T4a	YES	-19621	hnsc_tcga	Head and Neck Cancer	Head and Neck Squamous Cell Carcinoma	17	NA	NA	NA	436	53		Negative	NA	NOT HISPANIC OR LATINO	No Extranodal Extension	NA	2011-03-25			C32.9	YES	NA	1970-03-01	C32.9	NO	0	1.5	39	Functional (Limited) Neck Dissection	YES	NA	No	M0	Stage IVA	T4a	N0	N0	7	G2	Head & Neck Squamous Cell Carcinoma		NA	HNSC	97640ef0-0259-4244-95ba-48d28c60b372	8277e744-0508-47d5-9cea-11dcf7f56d35
TCGA-CN-4739	Stage IVA	M0	T4a	NO	-26081	hnsc_tcga	Head and Neck Cancer	Head and Neck Squamous Cell Carcinoma	NA	348	NA	NA	NA	71		Negative	NA	NOT HISPANIC OR LATINO	No Extranodal Extension	NA	2011-03-25			C32.9	YES	NA	1970-03-01	C32.9	NO	0	1.3	54	Functional (Limited) Neck Dissection	YES	NA	No	M0	Stage IVA	T4a	N0	N0	NA	G2	Head & Neck Squamous Cell Carcinoma		NA	HNSC	7e3b90c1-8772-4e12-8050-a156558beb82	f450dbe6-4972-4c49-af97-963bcd0d0da0
TCGA-CN-4740	Stage IVA	M0	T4a	NO	-29186	hnsc_tcga	Head and Neck Cancer	Head and Neck Squamous Cell Carcinoma	4	811	NA	NA	NA	79		Negative	NA		No Extranodal Extension	NA	2011-05-02			C06.9	YES	NA	1970-03-01	C06.9	NO	0	1.5	26	Functional (Limited) Neck Dissection	YES	NA	No	M0	Stage IVA	T4a	N0	N0	NA	G2	Head & Neck Squamous Cell Carcinoma		NA	HNSC	e37c83dc-c2c4-4e5f-a57b-39ffcf9aa3cf	2311deec-8dbc-4449-be09-fcd4e3bafd87
TCGA-CN-4741	Stage IVA	M0	T4a	NO	-27506	hnsc_tcga	Head and Neck Cancer	Head and Neck Squamous Cell Carcinoma	NA	876	NA	NA	NA	75		Negative	NA	NOT HISPANIC OR LATINO	No Extranodal Extension	NA	2011-05-03			C03.9	YES	NA	1970-03-01	C03.9	NO	0	1	46	Functional (Limited) Neck Dissection	YES	NA	No	M0	Stage IVA	T4a	N0	N0	NA	G2	Head & Neck Squamous Cell Carcinoma		NA	HNSC	277b02e9-ded5-4980-845d-af53690000ac	03c9108a-5139-4bac-9641-c7dbbedef420
TCGA-CN-4742	Stage IVA	M0	T4a	YES	-17793	hnsc_tcga	Head and Neck Cancer	Head and Neck Squamous Cell Carcinoma	6	NA	NA	NA	397	48		Negative	NA	NOT HISPANIC OR LATINO	No Extranodal Extension	NA	2011-03-25	Negative	Negative	C02.9	YES	NA	1970-03-01	C02.9	NO	0	1.5	49	Functional (Limited) Neck Dissection	YES	NA	No	M0	Stage IVA	T4a	N1	N2b	NA	G3	Head & Neck Squamous Cell Carcinoma		NA	HNSC	444e5bfc-d4e5-4b0d-b96d-88ecea8873e9	507b9a1d-bfbf-43f8-86d2-665a488441af
TCGA-CN-5355	Stage IVA		T4a	NO	-23670	hnsc_tcga	Head and Neck Cancer	Head and Neck Squamous Cell Carcinoma	NA	279	NA	NA	NA	64		Negative	NA	NOT HISPANIC OR LATINO	No Extranodal Extension	NA	2011-05-04			C32.9	YES	NA	1970-03-01	C32.9	NO	0	0.8	27	Functional (Limited) Neck Dissection	YES	NA	No	M0	Stage IVA	T4a	N0	N0	3	G2	Head & Neck Squamous Cell Carcinoma		NA	HNSC	45a10908-19e6-421a-8903-1440bfa57c9d	63535469-d402-4ba2-9ab5-986e6ed80f55
TCGA-CN-5356	Stage III		T3	NO	-20540	hnsc_tcga	Head and Neck Cancer	Head and Neck Squamous Cell Carcinoma	NA	289	NA	NA	NA	56		Negative	NA	NOT HISPANIC OR LATINO	No Extranodal Extension	NA	2011-05-03			C32.9	YES	NA	1970-03-01	C32.9	NO	0	1.3	97	Functional (Limited) Neck Dissection	YES	NA	No	M0	Stage III	T3	N0	N0	NA	G2	Head & Neck Squamous Cell Carcinoma		NA	HNSC	e1fed7aa-2bce-45ae-b0c6-7f50ef97e425	bcb5da85-78d6-4519-9740-378587b1bd37
TCGA-CN-5358	Stage II		T2	NO	-22138	hnsc_tcga	Head and Neck Cancer	Head and Neck Squamous Cell Carcinoma	6	173	NA	NA	NA	60		Negative	NA	NOT HISPANIC OR LATINO	No Extranodal Extension	NA	2011-04-06	Negative	Negative	C04.9	YES	NA	1970-03-01	C04.9	NO	0	1.2	57	Modified Radical Neck Dissection	YES	NA	No	M0	Stage III	T2	N1	N0	2	G2	Head & Neck Squamous Cell Carcinoma		NA	HNSC	b4e0c62d-f2f6-4243-9e0f-ae2ad4ca4bb8	c38a9e9d-5854-4827-9974-582c45efc187
TCGA-CN-5359	Stage IVA	M0	T4a	NO	-21858	hnsc_tcga	Head and Neck Cancer	Head and Neck Squamous Cell Carcinoma	NA	NA	NA	NA	377	59		Negative	NA	NOT HISPANIC OR LATINO	No Extranodal Extension	NA	2011-05-04	Negative	Negative	C04.9	YES	NA	1970-03-01	C04.9	NO	0	0.6	29	Functional (Limited) Neck Dissection	YES	NA	No	M0	Stage IVA	T4a	N1	N2b	NA	G2	Head & Neck Squamous Cell Carcinoma		NA	HNSC	bfaa4b3f-3e38-478e-99b3-013f2cda80f5	6c9e3035-e68f-424b-aa0f-e75666892aa4
TCGA-CN-5360	Stage IVA	M0	T4a	YES	-25034	hnsc_tcga	Head and Neck Cancer	Head and Neck Squamous Cell Carcinoma	NA	867	NA	NA	NA	68		Negative	NA	NOT HISPANIC OR LATINO	No Extranodal Extension	NA	2011-05-03			C32.9	YES	NA	1970-03-01	C32.9	NO	0	1.3	54	Functional (Limited) Neck Dissection	YES	NA	No	M0	Stage IVA	T4a	N0	N0	NA	G2	Head & Neck Squamous Cell Carcinoma		NA	HNSC	5793879b-f663-4a10-9bd9-1acd2e189650	0c00768e-8b13-4b8e-80fc-b344740845f1
TCGA-CN-5361	Stage IVA	M0	T4a	YES	-29383	hnsc_tcga	Head and Neck Cancer	Head and Neck Squamous Cell Carcinoma	NA	194	NA	NA	NA	80		Negative	NA	NOT HISPANIC OR LATINO	No Extranodal Extension	NA	2011-05-03			C32.9	YES	NA	1970-03-01	C32.9	NO	0	1	56	Functional (Limited) Neck Dissection	YES	NA	No			TX	NX	N2a	NA	G2	Head & Neck Squamous Cell Carcinoma		NA	HNSC	044579ef-16a6-4f00-b951-edc423d8a14f	c807171a-4433-4246-a454-c5cf768da8aa
TCGA-CN-5363	Stage IVB	M0	T4a	NO	-17635	hnsc_tcga	Head and Neck Cancer	Head and Neck Squamous Cell Carcinoma	NA	NA	NA	NA	253	48		Negative	NA	NOT HISPANIC OR LATINO	Microscopic Extension	NA	2011-05-03			C32.9	YES	NA	1970-03-01	C32.9	NO	0	0.9	28	Modified Radical Neck Dissection	YES	NA	No	M0	Stage IVB	T4a	N3	N3	NA	G3	Head & Neck Squamous Cell Carcinoma		NA	HNSC	291b069c-9dde-4e1e-8430-85146bc94338	5e4e1e21-8016-4e27-8f72-2411714203e8
TCGA-CN-5364	Stage IVA	M0	T4a	NO	-20362	hnsc_tcga	Head and Neck Cancer	Head and Neck Squamous Cell Carcinoma	NA	NA	NA	NA	493	55		Negative	NA	NOT HISPANIC OR LATINO	Microscopic Extension	NA	2011-05-04			C04.9	YES	NA	1970-03-01	C04.9	NO	0	0.8	73	Functional (Limited) Neck Dissection	YES	NA	No	M0	Stage IVA	T4a	N2c	N2c	NA	G2	Head & Neck Squamous Cell Carcinoma		NA	HNSC	13f63218-0949-41e6-a661-c844414c45b5	38a4ac42-be08-4187-98c2-af861218c3db
TCGA-CN-5365	Stage IVB		T2	YES	-14190	hnsc_tcga	Head and Neck Cancer	Head and Neck Squamous Cell Carcinoma	NA	NA	NA	NA	351	38		Negative	NA	NOT HISPANIC OR LATINO	Microscopic Extension	NA	2011-05-03			C09.9	YES	NA	1970-03-01	C09.9	NO	0	1	9	Modified Radical Neck Dissection	YES	NA	No	M1	Stage IVC	T1	N2	N3	NA	G2	Head & Neck Squamous Cell Carcinoma		NA	HNSC	4cffea0b-90a7-4c86-a73f-bb8feca3ada7	665d4bff-603c-497b-816f-c98784665d0f
TCGA-CN-5366	Stage IVA	M0	T4a		-18904	hnsc_tcga	Head and Neck Cancer	Head and Neck Squamous Cell Carcinoma	6	NA	NA	NA	360	51		Negative	NA	NOT HISPANIC OR LATINO	Microscopic Extension	NA	2011-05-03			C32.9	YES	NA	1970-03-01	C32.9	NO	0	1.6	47	Functional (Limited) Neck Dissection	YES	NA	No	M0	Stage IVA	T4a	N2c	N2c	7	G2	Head & Neck Squamous Cell Carcinoma		NA	HNSC	30eb06a5-8e88-4c46-bebb-fb93ca07f108	62fdf8f3-a028-453f-b27c-c2506be68cbe
TCGA-CN-5367	Stage IVA	M0	T4a	YES	-22246	hnsc_tcga	Head and Neck Cancer	Head and Neck Squamous Cell Carcinoma	NA	NA	NA	NA	352	60		Negative	NA	NOT HISPANIC OR LATINO	Microscopic Extension	NA	2011-05-04			C02.9	YES	NA	1970-03-01	C02.9	NO	0	1.2	46	Functional (Limited) Neck Dissection	YES	NA	No	M0	Stage IVA	T4a	N0	N2b	NA	G2	Head & Neck Squamous Cell Carcinoma		NA	HNSC	61d0709c-d148-413b-a7b5-c0c82ed2f32f	379f9e65-54f3-4566-b018-3f3eee6a4df4
TCGA-CN-5369	Stage IVA	M0	T4a	NO	-32871	hnsc_tcga	Head and Neck Cancer	Head and Neck Squamous Cell Carcinoma	NA	NA	NA	NA	380	90		Negative	NA	NOT HISPANIC OR LATINO	No Extranodal Extension	NA	2011-05-04			C05.0	YES	NA	1970-03-01	C05.0	NO	0	1	82	Functional (Limited) Neck Dissection	YES	NA	No	M0	Stage IVA	T4a	N1	N0	NA	G3	Head & Neck Squamous Cell Carcinoma		NA	HNSC	b98867d7-7d5a-4c58-8878-37bee6f2f4fa	b4c02606-0f86-46e4-9daf-dc7dbcd60d78
TCGA-CN-5370	Stage III	M0	T3	NO	-28549	hnsc_tcga	Head and Neck Cancer	Head and Neck Squamous Cell Carcinoma	NA	NA	NA	NA	259	78		Negative	NA	NOT HISPANIC OR LATINO	Microscopic Extension	NA	2012-01-11	Negative	Negative	C02.9	YES	NA	1970-03-01	C02.9	NO	0	3.2	40	Functional (Limited) Neck Dissection	YES	NA	No	M0	Stage II	T2	N0	N1	NA	G3	Head & Neck Squamous Cell Carcinoma		NA	HNSC	54dab158-eb39-4334-8b5a-bf290e6b8bb1	5cad0e42-2e0f-4a89-8aa5-18fbdc92a6a5
TCGA-CN-5373	Stage I		T1	NO	-20143	hnsc_tcga	Head and Neck Cancer	Head and Neck Squamous Cell Carcinoma	NA	413	NA	NA	NA	55		Negative	NA	NOT HISPANIC OR LATINO	No Extranodal Extension	NA	2011-05-04	Negative	Negative	C04.9	YES	NA	1970-03-01	C04.9	NO	0	1.4	30	Functional (Limited) Neck Dissection	YES	NA	No	M0	Stage II	T2	N0	N0	NA	G1	Head & Neck Squamous Cell Carcinoma		NA	HNSC	546f01d5-aed5-4fb8-91c0-0fd5e0fde935	9d73d061-f1e1-47ba-929d-feeb6c191279
TCGA-CN-5374	Stage IVA	M0	T2		-20464	hnsc_tcga	Head and Neck Cancer	Head and Neck Squamous Cell Carcinoma	NA	290	NA	NA	NA	56		Positive	NA	NOT HISPANIC OR LATINO		NA	2011-05-03	Positive		C09.9	YES	NA	1970-03-01	C09.9	NO	0	0.9	NA		NO	NA	No	M0	Stage IVA	T2	N2	N2	NA	G3	Head & Neck Squamous Cell Carcinoma		NA	HNSC	d7641ca1-a062-4dd2-9414-447af7311a84	617df1e0-b075-4610-b6d5-8850786fea70
TCGA-CN-6010	Stage IVA		T4a	YES	-19475	hnsc_tcga	Head and Neck Cancer	Head and Neck Squamous Cell Carcinoma	4	207	NA	NA	NA	53		Negative	NA	NOT HISPANIC OR LATINO	No Extranodal Extension	NA	2011-06-13	Negative	Negative	C32.9	YES	NA	1970-03-01	C32.9	NO	0	1	39	Modified Radical Neck Dissection	YES	NA	No	M0	Stage IVA	T4a	N0	N2c	7	G2	Head & Neck Squamous Cell Carcinoma		NA	HNSC	af31bf2c-8523-4376-bfa8-e2845848d651	cd2a5d45-9bae-4c96-b8dd-7ad079153a49
TCGA-CN-6011	Stage IVA		T4a	NO	-21016	hnsc_tcga	Head and Neck Cancer	Head and Neck Squamous Cell Carcinoma	NA	228	NA	NA	NA	57			NA	NOT HISPANIC OR LATINO	No Extranodal Extension	NA	2011-06-14			C03.9	YES	NA	1970-03-01	C03.9	NO	0	0.8	44	Functional (Limited) Neck Dissection	YES	NA	No	M0	Stage IVA	T4a	N0	N0	NA	G3	Head & Neck Squamous Cell Carcinoma		NA	HNSC	e7d49212-e9cb-4cd7-923a-bdfc82a4a150	afbf3020-1715-4e74-8224-05e316796999
TCGA-CN-6012	Stage IVA		T3	YES	-24286	hnsc_tcga	Head and Neck Cancer	Head and Neck Squamous Cell Carcinoma	NA	144	NA	NA	NA	66			NA	NOT HISPANIC OR LATINO	No Extranodal Extension	NA	2011-06-14	Negative	Negative	C32.9	YES	NA	1970-03-01	C32.9	NO	0	1	35	Functional (Limited) Neck Dissection	YES	NA	No	M0	Stage III	T3	N1	N2c	NA	G2	Head & Neck Squamous Cell Carcinoma		NA	HNSC	9023c9bf-02a0-4396-8161-304089957b62	e23c7006-1a13-4211-8920-47548641e574
TCGA-CN-6013	Stage IVA		T4a	YES	-20703	hnsc_tcga	Head and Neck Cancer	Head and Neck Squamous Cell Carcinoma	NA	155	NA	NA	NA	56		Negative	NA	NOT HISPANIC OR LATINO	Microscopic Extension	NA	2011-06-14	Negative	Negative	C03.9	YES	NA	1970-03-01	C03.9	NO	0	1	28	Functional (Limited) Neck Dissection	YES	NA	No	M0	Stage IVA	T4a	N2b	N2b	NA	G3	Head & Neck Squamous Cell Carcinoma		NA	HNSC	714496c5-d221-4397-9c5a-cd2d22603e6f	d018cd44-6b01-44f2-9181-81153225aab8
TCGA-CN-6016	Stage IVA		T4a	YES	-23664	hnsc_tcga	Head and Neck Cancer	Head and Neck Squamous Cell Carcinoma	12	202	NA	NA	NA	64		Negative	NA	NOT HISPANIC OR LATINO	Microscopic Extension	NA	2011-06-14	Negative	Negative	C02.9	YES	NA	1970-03-01	C02.9	NO	0	1.3	75	Functional (Limited) Neck Dissection	YES	NA	No	M0	Stage IVA	T4a	N1	N1	7	G2	Head & Neck Squamous Cell Carcinoma		NA	HNSC	ffcf851d-7fa1-4b45-911a-a3fbd74c253a	6172b6e1-1403-4ba0-a323-8c00a459abd6
TCGA-CN-6017	Stage IVA		T3	YES	-20358	hnsc_tcga	Head and Neck Cancer	Head and Neck Squamous Cell Carcinoma	3	160	NA	NA	NA	55		Negative	NA	NOT HISPANIC OR LATINO	Microscopic Extension	NA	2011-06-14	Negative	Negative	C02.9	YES	NA	1970-03-01	C02.9	NO	0	1	30	Modified Radical Neck Dissection	YES	NA	No	M0	Stage III	T2	N1	N2b	7	G2	Head & Neck Squamous Cell Carcinoma		NA	HNSC	23c4e2eb-142b-4fcc-a974-9a248aec3f37	6c07cd48-2269-4d42-9879-309ea4cd3a74
TCGA-CN-6018	Stage IVA		T4a	NO	-31242	hnsc_tcga	Head and Neck Cancer	Head and Neck Squamous Cell Carcinoma	NA	45	NA	NA	NA	85		Negative	NA	NOT HISPANIC OR LATINO	Microscopic Extension	NA	2011-06-14			C14.8	YES	NA	1970-03-01	C14.8	NO	0	1.5	20	Functional (Limited) Neck Dissection	YES	NA	No	M0	Stage IVA	T4a	N2c	N2b	NA	G2	Head & Neck Squamous Cell Carcinoma		NA	HNSC	55838e1f-07e8-49ca-89d6-46216babc6f7	1a3e8c8b-9e99-499a-9ba7-4cdfc11b106d
TCGA-CN-6019	Stage IVA		T4a	NO	-22485	hnsc_tcga	Head and Neck Cancer	Head and Neck Squamous Cell Carcinoma	3	135	NA	NA	NA	61			NA	NOT HISPANIC OR LATINO		NA	2011-06-15	Negative	Negative	C02.9	YES	NA	1970-03-01	C02.9	NO	0	1	45		YES	NA	No	M0	Stage IVA	T4a	N0	N0	7	G2	Head & Neck Squamous Cell Carcinoma		NA	HNSC	ee3061ec-273c-4bef-a325-35e9c469bf01	ac349695-2219-4a67-add5-a94ff85794e1
TCGA-CN-6020	Stage III		T2	YES	-21232	hnsc_tcga	Head and Neck Cancer	Head and Neck Squamous Cell Carcinoma	NA	98	NA	NA	NA	58		Negative	NA	NOT HISPANIC OR LATINO	No Extranodal Extension	NA	2011-06-15	Negative	Negative	C04.9	YES	NA	1970-03-01	C04.9	NO	0	0.9	68	Functional (Limited) Neck Dissection	YES	NA	No	M0	Stage IVA	T3	N2c	N1	NA	G2	Head & Neck Squamous Cell Carcinoma		NA	HNSC	9283709d-d019-4291-a097-611a5c05244b	5a0058ee-8f97-4418-889f-8f24475dafc1
TCGA-CN-6021			TX		-23212	hnsc_tcga	Head and Neck Cancer	Head and Neck Squamous Cell Carcinoma	NA	NA	NA	NA	276	63			NA	NOT HISPANIC OR LATINO		NA	2011-06-14			C32.9	YES	NA	1970-03-01	C32.9	NO	0	1	NA		NO	NA	No	M0	Stage III	T3	N0	NX	NA	G2	Head & Neck Squamous Cell Carcinoma		NA	HNSC	9eb1997f-14f5-4230-ae4f-1ef1943e1723	f1cbf326-7657-4c9b-9c8d-e2036e89fd07
TCGA-CN-6022	Stage IVA	M0	T4a	YES	-17971	hnsc_tcga	Head and Neck Cancer	Head and Neck Squamous Cell Carcinoma	NA	202	NA	NA	NA	49		Positive	NA	NOT HISPANIC OR LATINO	Microscopic Extension	NA	2011-06-14	Negative	Negative	C32.9	YES	NA	1970-03-01	C32.9	NO	0	1	33	Functional (Limited) Neck Dissection	YES	NA	No	M0	Stage IVA	T4a	N1	N1	NA	G3	Head & Neck Squamous Cell Carcinoma		NA	HNSC	339f80f9-a542-4aaa-8bb8-3784493dd5ab	3b8fd8fb-429a-47ac-8b99-ae42a3fe968d
TCGA-CN-6024	Stage IVA	M0	T4a	YES	-24259	hnsc_tcga	Head and Neck Cancer	Head and Neck Squamous Cell Carcinoma	NA	224	NA	NA	NA	66		Negative	NA	NOT HISPANIC OR LATINO	Microscopic Extension	NA	2011-06-15	Negative	Negative	C02.9	YES	NA	1970-03-01	C02.9	NO	0	1.2	39	Functional (Limited) Neck Dissection	YES	NA	No	M0	Stage IVA	T4a	N2	N2c	NA	G2	Head & Neck Squamous Cell Carcinoma		NA	HNSC	2fc48edb-a428-49c3-9599-d00eb2b448ac	5f21f4c8-7837-41c0-937c-274534cc0740
TCGA-CN-6988	Stage IVA		T4a	YES	-17308	hnsc_tcga	Head and Neck Cancer	Head and Neck Squamous Cell Carcinoma	6	43	NA	NA	NA	47		Negative	NA	NOT HISPANIC OR LATINO	No Extranodal Extension	NA	2011-08-17	Negative	Negative	C32.9	YES	NA	1970-03-01	C32.9	NO	0	1.4	81	Functional (Limited) Neck Dissection	YES	NA	No	M0	Stage IVA	T4a	N2b	N2b	7	G3	Head & Neck Squamous Cell Carcinoma		NA	HNSC	426a24aa-82c3-42a4-90df-4837871ee286	ca2a45b4-1eb0-4e28-a4c8-5647bfbaa98c
TCGA-CN-6989	Stage IVA		T3	YES	-23515	hnsc_tcga	Head and Neck Cancer	Head and Neck Squamous Cell Carcinoma	3	178	NA	NA	NA	64		Negative	NA	NOT HISPANIC OR LATINO	Microscopic Extension	NA	2011-08-17	Negative	Negative	C32.9	YES	NA	1970-03-01	C32.9	NO	0	1.3	56	Functional (Limited) Neck Dissection	YES	NA	No	M0	Stage IVA	T3	N2b	N2c	7	G2	Head & Neck Squamous Cell Carcinoma		NA	HNSC	f33aa93f-b32d-4c4f-9a71-1e5ab69c6899	7ac8fb22-0a09-4b16-af8c-b5c2e90a968a
TCGA-CN-6992	Stage IVA		T3	YES	-22598	hnsc_tcga	Head and Neck Cancer	Head and Neck Squamous Cell Carcinoma	16	83	NA	NA	NA	61		Negative	NA	NOT HISPANIC OR LATINO	No Extranodal Extension	NA	2011-08-17	Negative	Negative	C32.9	YES	NA	1970-03-01	C32.9	NO	0	1	48	Functional (Limited) Neck Dissection	YES	NA	No	M0	Stage IVA	T4a	N1	N2b	7	G2	Head & Neck Squamous Cell Carcinoma		NA	HNSC	547de7d8-c2f1-41d7-a0b4-cc6f39712301	ce0b9c55-baeb-4ca8-9235-51a836a4b58f
TCGA-CN-6994	Stage IVA		T4a	NO	-24778	hnsc_tcga	Head and Neck Cancer	Head and Neck Squamous Cell Carcinoma	NA	119	NA	NA	NA	67		Negative	NA	NOT HISPANIC OR LATINO	No Extranodal Extension	NA	2011-08-22			C14.8	YES	NA	1970-03-01	C14.8	NO	0	1.5	37	Modified Radical Neck Dissection	YES	NA	No	M0	Stage IVA	T4a	N2b	N0	NA	G2	Head & Neck Squamous Cell Carcinoma		NA	HNSC	6909302d-358a-46cd-8052-eedb09c83c83	1a5af8e2-61b4-4a04-b4b6-ea41fc34c89a
TCGA-CN-6995	Stage IVA		T4a	YES	-28850	hnsc_tcga	Head and Neck Cancer	Head and Neck Squamous Cell Carcinoma	NA	NA	NA	NA	112	78		Negative	NA	NOT HISPANIC OR LATINO	No Extranodal Extension	NA	2011-08-29			C04.9	YES	NA	1970-03-01	C04.9	NO	0	1	51	Functional (Limited) Neck Dissection	YES	NA	No	M0	Stage IVA	T4a	N1	N0	NA	G2	Head & Neck Squamous Cell Carcinoma		NA	HNSC	396ccdcb-40eb-4299-8575-b26753054434	3e517996-495b-4e25-bba3-857a48fc0c3f
TCGA-CN-6996	Stage IVA		T3	YES	-21447	hnsc_tcga	Head and Neck Cancer	Head and Neck Squamous Cell Carcinoma	NA	114	NA	NA	NA	58		Negative	NA	NOT HISPANIC OR LATINO	Microscopic Extension	NA	2011-08-22			C02.9	YES	NA	1970-03-01	C02.9	NO	0	1.3	24	Modified Radical Neck Dissection	YES	NA	No	M0	Stage IVA	T3	N2b	N2b	NA	G2	Head & Neck Squamous Cell Carcinoma		NA	HNSC	49b94421-fe82-4f24-8ef2-820674142418	2c3790ce-a54d-431b-b76c-fa25441aa41c
TCGA-CN-6997	Stage IVA		T3	YES	-24298	hnsc_tcga	Head and Neck Cancer	Head and Neck Squamous Cell Carcinoma	NA	100	NA	NA	NA	66		Positive	NA	NOT HISPANIC OR LATINO	Microscopic Extension	NA	2011-08-22	Negative	Negative	C32.9	YES	NA	1970-03-01	C32.9	NO	0	0.7	25	Functional (Limited) Neck Dissection	YES	NA	No	M0	Stage IVA	T4a	N2	N2c	NA	G3	Head & Neck Squamous Cell Carcinoma		NA	HNSC	171890ae-0391-4d8c-9bd2-090d866a2c5b	b4c9a3aa-151e-478b-bc18-ce793b68ae09
TCGA-CN-6998	Stage IVA		T3	NO	-19447	hnsc_tcga	Head and Neck Cancer	Head and Neck Squamous Cell Carcinoma	NA	46	NA	NA	NA	53		Negative	NA	NOT HISPANIC OR LATINO	Microscopic Extension	NA	2011-08-24	Negative	Negative	C02.9	YES	NA	1970-03-01	C02.9	NO	0	1.2	26	Functional (Limited) Neck Dissection	YES	NA	No	M0	Stage IVA	T4a	N1	N2b	NA	G2	Head & Neck Squamous Cell Carcinoma		NA	HNSC	039788ec-1364-40c7-9e9d-13dc305674e9	64c8db8b-5d5c-4fbe-8996-4a7cb161d4a0
TCGA-CN-A497	Stage III	MX	T1	YES	-23310	hnsc_tcga	Head and Neck Cancer	Head and Neck Squamous Cell Carcinoma	NA	490	450	NA	NA	63	NO	Negative	NA	NOT HISPANIC OR LATINO	No Extranodal Extension	NA	2012-12-03	Negative	Negative	C32.9	YES	180	1972-03-01	C32.9	NO	0	NA	69	Modified Radical Neck Dissection	YES	NA	No	M0	Stage IVA	T2	N2c	N1	NA	G2	Head & Neck Squamous Cell Carcinoma	NO	FALSE	HNSC	76214B90-C323-4FDC-92F4-1180ABDB1380	BEA32BD5-4068-4351-994E-09B3BF819EBB
TCGA-CN-A498	Stage III	MX	T3	NO	-22330	hnsc_tcga	Head and Neck Cancer	Head and Neck Squamous Cell Carcinoma	NA	443	339	NA	NA	61	YES	Negative	NA	NOT HISPANIC OR LATINO		NA	2012-12-03			C02.9	YES	190	1971-03-01	C02.9	NO	0	NA	23	Functional (Limited) Neck Dissection	YES	NA	No	M0	Stage II	T2	N0	N0	NA	G1	Head & Neck Squamous Cell Carcinoma	YES	FALSE	HNSC	34AAD752-D78F-440B-ABD2-F9F939C82664	38C7683C-CCDB-480B-9015-2E4F24DE17B8
TCGA-CN-A499	Stage II	MX	T2	NO	-21971	hnsc_tcga	Head and Neck Cancer	Head and Neck Squamous Cell Carcinoma	0	388	293	NA	NA	60	NO	Negative	NA	NOT HISPANIC OR LATINO		NA	2012-12-03	Positive	Positive	C09.9	YES	130	1972-03-01	C09.9	NO	0	NA	37	Functional (Limited) Neck Dissection	YES	NA	No	M0	Stage I	T1	N0	N0	0	G2	Head & Neck Squamous Cell Carcinoma	NO	FALSE	HNSC	A3D89882-6D5B-497A-A9E4-A8B8908C3FF4	9CA906CE-18F9-41C5-AFCC-353B26FDEBAA
TCGA-CN-A49A	Stage IVB	MX	T4b	NO	-21995	hnsc_tcga	Head and Neck Cancer	Head and Neck Squamous Cell Carcinoma	0	391	309	NA	NA	60	YES	Negative	NA	NOT HISPANIC OR LATINO	No Extranodal Extension	NA	2012-12-03			C05.9	YES	280	1971-03-01	C05.9	NO	0	NA	59	Functional (Limited) Neck Dissection	YES	NA	No	M0	Stage IVA	T4a	N0	N0	0	G2	Head & Neck Squamous Cell Carcinoma	YES	FALSE	HNSC	5FE17DDE-EF75-49A2-90F8-0647077B6CA5	77234A56-CAD6-4B84-AABB-032BE68F7DEA
TCGA-CN-A49B	Stage III	MX	T3	YES	-26155	hnsc_tcga	Head and Neck Cancer	Head and Neck Squamous Cell Carcinoma	7	447	394	NA	NA	71	YES	Negative	NA	NOT HISPANIC OR LATINO	Microscopic Extension	NA	2012-12-03	Negative	Negative	C32.9	YES	270	1970-03-01	C32.9	NO	0	NA	39	Functional (Limited) Neck Dissection	YES	NA	No	M0	Stage III	T3	N1	N1	7	G3	Head & Neck Squamous Cell Carcinoma	NO	FALSE	HNSC	6F02648B-0C48-46EA-874A-407F951F0409	16B91D52-3168-44D9-BBBD-9F6E8B2582B6
TCGA-CN-A63T	Stage IVA	MX	T3	YES	-22201	hnsc_tcga	Head and Neck Cancer	Head and Neck Squamous Cell Carcinoma	1.7	225	519	NA	NA	60	YES	Negative	NA	NOT HISPANIC OR LATINO	Microscopic Extension	NA	2013-06-17		Negative	C32.9	YES	150	1970-03-01	C32.9	NO	0	NA	80	Functional (Limited) Neck Dissection	YES	NA	No	M0	Stage IVA	T3	N2b	N2b	7	G3	Head & Neck Squamous Cell Carcinoma	NO	FALSE	HNSC	A3F98E70-7050-46CF-A679-CA7A83F4442F	B477DFB8-C039-49D5-9A0E-912946DC3AD1
TCGA-CN-A63U	Stage IVA	MX	T3	YES	-18272	hnsc_tcga	Head and Neck Cancer	Head and Neck Squamous Cell Carcinoma	NA	526	504	NA	NA	50	YES	Negative	NA	NOT HISPANIC OR LATINO	No Extranodal Extension	NA	2013-06-17		Negative	C32.9	YES	200	1970-03-01	C32.9	NO	0	NA	45	Functional (Limited) Neck Dissection	YES	NA	No	M0	Stage III	T3	N0	N2b	NA	G3	Head & Neck Squamous Cell Carcinoma	NO	FALSE	HNSC	22233A31-023F-412F-9B42-73B58C51DEE8	812B8EE1-096A-40FF-914D-9957644B7D11
TCGA-CN-A63V	Stage IVA	MX	T4a	NO	-21734	hnsc_tcga	Head and Neck Cancer	Head and Neck Squamous Cell Carcinoma	NA	484	470	NA	NA	59	NO	Negative	NA	NOT HISPANIC OR LATINO	No Extranodal Extension	NA	2013-06-17		Negative	C06.0	YES	750	1970-03-01	C06.0	NO	0	NA	45	Modified Radical Neck Dissection	YES	NA	No	M0	Stage IVA	T4	N0	N0	NA	G2	Head & Neck Squamous Cell Carcinoma	NO	FALSE	HNSC	B8307F59-713F-404C-9A82-2450D2AD7507	2E4D2887-C1F3-40A2-9C22-9A5FA8D860C4
TCGA-CN-A63W	Stage IVA	MX	T4a	YES	-17693	hnsc_tcga	Head and Neck Cancer	Head and Neck Squamous Cell Carcinoma	0	348	279	NA	NA	48	YES	Negative	NA	NOT HISPANIC OR LATINO	Microscopic Extension	NA	2013-06-17	Negative	Negative	C32.9	YES	140	1970-03-01	C32.9	NO	0	NA	66	Functional (Limited) Neck Dissection	YES	NA	No	M0	Stage IVA	T4a	N2c	N2c	0	G2	Head & Neck Squamous Cell Carcinoma	NO	FALSE	HNSC	5D5DEFB3-8572-467D-B383-7358F802B398	8DA610B4-0A32-4EF8-9F55-1C969ADDD79F
TCGA-CN-A641	Stage IVA	MX	T4a	NO	-17454	hnsc_tcga	Head and Neck Cancer	Head and Neck Squamous Cell Carcinoma	0	367	346	NA	NA	47	YES	Negative	NA	NOT HISPANIC OR LATINO	Microscopic Extension	NA	2013-06-17		Positive	C32.9	YES	130	1971-03-01	C32.9	NO	0	NA	70	Functional (Limited) Neck Dissection	YES	NA	No	M0	Stage IVA	T4	N2c	N2b	0	G2	Head & Neck Squamous Cell Carcinoma	NO	FALSE	HNSC	600D5316-B795-4AB2-86FC-52835059386F	0C14D932-3B44-48FA-8974-DB6E01464851
TCGA-CN-A642	Stage IVB	M0	T4a	YES	-21011	hnsc_tcga	Head and Neck Cancer	Head and Neck Squamous Cell Carcinoma	0	NA	254	NA	82	57	NO	Positive	NA	NOT HISPANIC OR LATINO	Microscopic Extension	NA	2013-06-17		Negative	C02.9	YES	440	1970-03-01	C02.9	NO	0	NA	110	Functional (Limited) Neck Dissection	YES	NA	No	M0	Stage IVA	T3	N2c	N3	0	G3	Head & Neck Squamous Cell Carcinoma	NO	FALSE	HNSC	A1DED1E8-EB28-49DD-8F3D-1CE8F40EED8F	D6F87089-E47F-4FDB-9EC7-04CB55359A86
TCGA-CN-A6UY	Stage IVA	MX	T3	NO	-20967	hnsc_tcga	Head and Neck Cancer	Head and Neck Squamous Cell Carcinoma	NA	307	229	NA	NA	57	YES	Negative	NA	NOT HISPANIC OR LATINO	No Extranodal Extension	NA	2013-11-27	Positive	Positive	C01	YES	170	1972-03-01	C01.9	NO	0	NA	43	Functional (Limited) Neck Dissection	YES	NA	No	M0	Stage IVA	T3	N2a	N2b	NA	G2	Head & Neck Squamous Cell Carcinoma	NO	FALSE	HNSC	602F2512-00B6-44B6-9ED6-F8B010224F8C	A654BFE8-5342-4291-B482-31C836B659BB
TCGA-CN-A6V3	Stage IVA	M0	T3	YES	-22397	hnsc_tcga	Head and Neck Cancer	Head and Neck Squamous Cell Carcinoma	12	298	194	NA	NA	61	YES	Negative	NA	NOT HISPANIC OR LATINO	Microscopic Extension	NA	2013-12-02			C32.9	YES	230	1970-03-01	C32.9	NO	0	NA	37	Functional (Limited) Neck Dissection	YES	NA	No	M0	Stage IVA	T3	N2b	N2b	7	G3	Head & Neck Squamous Cell Carcinoma	NO	FALSE	HNSC	896E37FA-3A6A-481B-B790-5EE62BBDC9FA	285E2354-8EFD-4951-87CF-0E188D11423E
TCGA-CQ-5323	Stage I		T1	NO	-30173	hnsc_tcga	Head and Neck Cancer	Head and Neck Squamous Cell Carcinoma	1	1466	NA	NA	NA	82		Negative	NA	NOT HISPANIC OR LATINO	No Extranodal Extension	NA	2011-04-30			C14.8	YES	NA	1970-03-01	C14.8	NO	0	0.7	18	Functional (Limited) Neck Dissection	YES	NA	No	M0	Stage III	T3	N0	N0	7	G2	Head & Neck Squamous Cell Carcinoma		NA	HNSC	deefdd62-4d35-40c9-ad4c-0b593f35cff7	3ac5396d-b92f-41d5-a3f0-603aa52aafa3
TCGA-CQ-5324	Stage III		T3	NO	-21803	hnsc_tcga	Head and Neck Cancer	Head and Neck Squamous Cell Carcinoma	NA	1207	NA	NA	NA	59		Negative	NA	NOT HISPANIC OR LATINO	No Extranodal Extension	NA	2011-04-05			C14.8	YES	NA	1970-03-01	C14.8	NO	0	0.8	24	Functional (Limited) Neck Dissection	YES	NA	No	M0	Stage IVA	T3	N2a	N0	NA	G2	Head & Neck Squamous Cell Carcinoma		NA	HNSC	78e67b26-c473-449f-95e7-c4d11f066d5b	86d93606-6564-4a71-9c69-9f8f6d99daed
TCGA-CQ-5325	Stage I		T1	NO	-23833	hnsc_tcga	Head and Neck Cancer	Head and Neck Squamous Cell Carcinoma	3	NA	NA	NA	654	65		Negative	NA	NOT HISPANIC OR LATINO	No Extranodal Extension	NA	2011-04-05			C02.9	YES	NA	1970-03-01	C02.9	NO	0	1	22	Functional (Limited) Neck Dissection	YES	NA	No	M0	Stage I	T1	N0	N0	7	G2	Head & Neck Squamous Cell Carcinoma		NA	HNSC	408c5d54-7888-4955-8386-bf8819b48a6c	8394a7f6-1bf6-473e-a155-3da1a3de244f
TCGA-CQ-5326	Stage IVA		T4a	NO	-24473	hnsc_tcga	Head and Neck Cancer	Head and Neck Squamous Cell Carcinoma	2	NA	NA	NA	89	67		Negative	NA	NOT HISPANIC OR LATINO	Gross Extension	NA	2011-09-26			C14.8	YES	NA	1970-03-01	C14.8	NO	0	0.6	56	Functional (Limited) Neck Dissection	YES	NA	No	M0	Stage IVA	T4a	N2b	N2c	5	G3	Head & Neck Squamous Cell Carcinoma		NA	HNSC	dff4246a-57ea-46f2-a5bc-7aa82e494137	4e644ee9-9f05-4a7b-86f6-7cb836a5cf17
TCGA-CQ-5327	Stage IVA		T3	NO	-22307	hnsc_tcga	Head and Neck Cancer	Head and Neck Squamous Cell Carcinoma	NA	1184	NA	NA	NA	61		Negative	NA	NOT HISPANIC OR LATINO	No Extranodal Extension	NA	2011-04-07			C02.9	YES	NA	1970-03-01	C02.9	NO	0	1	55	Functional (Limited) Neck Dissection	YES	NA	No	M0	Stage IVA	T3	N2c	N2c	NA	G2	Head & Neck Squamous Cell Carcinoma		NA	HNSC	5a03e2b6-4c8b-479a-9036-9859af031da4	93d283a7-e866-4f23-81f7-942dee5009b8
TCGA-CQ-5329	Stage II		T2	NO	-17028	hnsc_tcga	Head and Neck Cancer	Head and Neck Squamous Cell Carcinoma	NA	841	NA	NA	NA	46		Negative	NA	NOT HISPANIC OR LATINO	No Extranodal Extension	NA	2011-04-12			C02.9	YES	NA	1970-03-01	C02.9	NO	0	1	29	Functional (Limited) Neck Dissection	YES	NA	No	M0	Stage III	T3	N1	N0	NA	G2	Head & Neck Squamous Cell Carcinoma		NA	HNSC	02dcc11f-4f0e-4c9e-8d96-d22d47beef5d	d22e9b65-495b-4d42-926a-01bf2c436d76
TCGA-CQ-5330	Stage IVA		T3	NO	-25255	hnsc_tcga	Head and Neck Cancer	Head and Neck Squamous Cell Carcinoma	NA	896	NA	NA	NA	69		Negative	NA	NOT HISPANIC OR LATINO	Microscopic Extension	NA	2011-04-12			C02.9	YES	NA	1970-03-01	C02.9	NO	0	1	44	Functional (Limited) Neck Dissection	YES	NA	No	M0	Stage III	T3	N1	N2b	NA	G3	Head & Neck Squamous Cell Carcinoma		NA	HNSC	9ffa79fa-d2d8-48e1-8fd6-4b020ecf357c	a70301b0-f66d-49b7-b420-c1f56b90002d
TCGA-CQ-5331			T2	NO	-26901	hnsc_tcga	Head and Neck Cancer	Head and Neck Squamous Cell Carcinoma	NA	1028	NA	NA	NA	73		Negative	NA	NOT HISPANIC OR LATINO	No Extranodal Extension	NA	2011-09-27			C14.8	YES	NA	1970-03-01	C14.8	NO	0	0.8	NA		NO	NA	No	M0	Stage IVA	T4a	N0	NX	NA	G2	Head & Neck Squamous Cell Carcinoma		NA	HNSC	dbf4e04d-095e-4554-a48c-fe7cb711ac42	03753a30-0549-4636-946f-89c73aae1e1f
TCGA-CQ-5332	Stage III		T3	NO	-32032	hnsc_tcga	Head and Neck Cancer	Head and Neck Squamous Cell Carcinoma	NA	NA	NA	NA	317	87		Negative	NA	NOT HISPANIC OR LATINO	No Extranodal Extension	NA	2011-04-12			C14.8	YES	NA	1970-03-01	C14.8	NO	0	1	31	Functional (Limited) Neck Dissection	YES	NA	No	M0	Stage III	T3	N0	N0	NA	G2	Head & Neck Squamous Cell Carcinoma		NA	HNSC	657346f2-4280-4d80-983e-cab8004f184a	a7d4de4a-6195-4e76-b307-7184229fd0d1
TCGA-CQ-5333	Stage II		T2	NO	-27110	hnsc_tcga	Head and Neck Cancer	Head and Neck Squamous Cell Carcinoma	NA	NA	NA	NA	341	74		Negative	NA	NOT HISPANIC OR LATINO	No Extranodal Extension	NA	2011-04-12			C02.9	YES	NA	1970-03-01	C02.9	NO	0	0.5	21	Functional (Limited) Neck Dissection	YES	NA	No	M0	Stage I	T1	N0	N0	NA	G3	Head & Neck Squamous Cell Carcinoma		NA	HNSC	06a802b9-0b5c-4ee4-9823-56d2e8c78422	8e64ca5d-74af-4d36-aef6-59dc3a2ab88b
TCGA-CQ-5334	Stage IVA		T3	NO	-32024	hnsc_tcga	Head and Neck Cancer	Head and Neck Squamous Cell Carcinoma	NA	NA	NA	NA	129	87		Close	NA	NOT HISPANIC OR LATINO	Gross Extension	NA	2011-04-12			C06.0	YES	NA	1970-03-01	C06.0	NO	0	0.7	46	Modified Radical Neck Dissection	YES	NA	No	M0	Stage IVB	T4b	N2b	N2b	NA	G2	Head & Neck Squamous Cell Carcinoma		NA	HNSC	1c25aad5-13f5-44dc-a18f-425d7626ce55	dbbe53dd-eeaa-4967-8c9b-255d5e00f181
TCGA-CQ-6218	Stage IVA		T3	NO	-19096	hnsc_tcga	Head and Neck Cancer	Head and Neck Squamous Cell Carcinoma	NA	870	NA	NA	NA	52		Negative	NA	NOT HISPANIC OR LATINO	No Extranodal Extension	NA	2011-09-27			C02.9	YES	NA	1970-03-01	C02.9	NO	0	0.8	15	Functional (Limited) Neck Dissection	YES	NA	No	M0	Stage III	T3	N0	N2b	NA	G2	Head & Neck Squamous Cell Carcinoma		NA	HNSC	64260b33-dac0-4442-82c8-04f0c9ea8a01	9baf9ac4-74dc-4c50-93cc-b48a1886e67f
TCGA-CQ-6219	Stage IVA		T3	NO	-18578	hnsc_tcga	Head and Neck Cancer	Head and Neck Squamous Cell Carcinoma	1.7	NA	NA	NA	479	50		Negative	NA	NOT HISPANIC OR LATINO	Microscopic Extension	NA	2011-09-27			C02.9	YES	NA	1970-03-01	C02.9	NO	0	0.6	55	Functional (Limited) Neck Dissection	YES	NA	No	M0	Stage IVA	T3	N2b	N2a	7	G2	Head & Neck Squamous Cell Carcinoma		NA	HNSC	0ca3d25a-22e9-4e40-834b-65f402535005	2aad293c-b3ed-4bd7-971d-ea8a5efc66ad
TCGA-CQ-6220	Stage III		T3	NO	-25366	hnsc_tcga	Head and Neck Cancer	Head and Neck Squamous Cell Carcinoma	NA	NA	NA	NA	985	69		Close	NA	NOT HISPANIC OR LATINO	No Extranodal Extension	NA	2011-09-27			C14.8	YES	NA	1970-03-01	C14.8	NO	0	0.6	42	Radical Neck Dissection	YES	NA	No	M0	Stage III	T2	N1	N0	NA	G2	Head & Neck Squamous Cell Carcinoma		NA	HNSC	96d0cefe-7949-4736-a7dc-1e4fa94765ec	e0e75203-3982-40b2-a057-faa8433dfb7a
TCGA-CQ-6221			T2	NO	-29026	hnsc_tcga	Head and Neck Cancer	Head and Neck Squamous Cell Carcinoma	NA	1000	NA	NA	NA	79		Negative	NA	NOT HISPANIC OR LATINO	No Extranodal Extension	NA	2012-01-16			C02.9	YES	NA	1970-03-01	C02.9	NO	0	1	NA		NO	NA	No	M0	Stage II	T2	N0	NX	7	G3	Head & Neck Squamous Cell Carcinoma		NA	HNSC	839b660c-98fe-4468-a2b3-408594350250	65baae80-7fd5-40b1-b5fb-bdd013b70931
TCGA-CQ-6222	Stage IVA		T2	NO	-23326	hnsc_tcga	Head and Neck Cancer	Head and Neck Squamous Cell Carcinoma	NA	1160	NA	NA	NA	63		Negative	NA	NOT HISPANIC OR LATINO	No Extranodal Extension	NA	2011-10-03			C02.9	YES	NA	1970-03-01	C02.9	NO	0	0.8	66	Modified Radical Neck Dissection	YES	NA	No	M0	Stage IVA	T3	N2b	N2b	NA	G2	Head & Neck Squamous Cell Carcinoma		NA	HNSC	e1670628-632d-4305-be07-9b9b6bea3350	64685862-0e99-4f78-80cd-7f11ad35ef56
TCGA-CQ-6223	Stage II		T2	NO	-25266	hnsc_tcga	Head and Neck Cancer	Head and Neck Squamous Cell Carcinoma	NA	1057	NA	NA	NA	69		Negative	NA	NOT HISPANIC OR LATINO	No Extranodal Extension	NA	2011-10-03			C14.8	YES	NA	1970-03-01	C14.8	NO	0	0.9	32	Modified Radical Neck Dissection	YES	NA	No	M0	Stage IVA	T4a	N0	N0	NA	G2	Head & Neck Squamous Cell Carcinoma		NA	HNSC	d9e8c707-e61a-4813-8dc0-2472e9ccf12b	775db365-3533-41d9-b635-582292b22700
TCGA-CQ-6224	Stage IVA		T2	NO	-19051	hnsc_tcga	Head and Neck Cancer	Head and Neck Squamous Cell Carcinoma	1	985	NA	NA	NA	52		Negative	NA	NOT HISPANIC OR LATINO	Microscopic Extension	NA	2011-10-05			C02.9	YES	NA	1970-03-01	C02.9	NO	0	1.2	29	Functional (Limited) Neck Dissection	YES	NA	No	M0	Stage II	T2	N0	N2b	2	G3	Head & Neck Squamous Cell Carcinoma		NA	HNSC	d86fd392-fa5c-4142-a647-440e6c32d478	ad242eac-a5ae-42b7-85ce-3e4d0dd308d6
TCGA-CQ-6225	Stage III		T3	NO	-23988	hnsc_tcga	Head and Neck Cancer	Head and Neck Squamous Cell Carcinoma	NA	NA	NA	NA	403	65		Close	NA	NOT HISPANIC OR LATINO	No Extranodal Extension	NA	2011-12-13			C14.8	YES	NA	1970-03-01	C14.8	NO	0	0.7	25	Functional (Limited) Neck Dissection	YES	NA	Yes	M0	Stage II	T2	N0	N0	NA	G2	Head & Neck Squamous Cell Carcinoma		NA	HNSC	90f44998-3c05-44b2-9501-bbd0f43c5147	e907d8d4-c4c6-441f-9f19-ff3746e5d13e
TCGA-CQ-6227	Stage IVA		T3	NO	-28466	hnsc_tcga	Head and Neck Cancer	Head and Neck Squamous Cell Carcinoma	3	NA	NA	NA	129	77		Close	NA	NOT HISPANIC OR LATINO	Microscopic Extension	NA	2011-10-06			C14.8	YES	NA	1970-03-01	C14.8	NO	0	0.6	59	Functional (Limited) Neck Dissection	YES	NA	No	M0	Stage III	T3	N1	N2c	7	G2	Head & Neck Squamous Cell Carcinoma		NA	HNSC	5d227ea8-bd74-4e8f-9bee-9d981f03d66f	47a35569-f580-4792-8501-0afb8a70dc4d
TCGA-CQ-6228	Stage IVA		T1	NO	-25942	hnsc_tcga	Head and Neck Cancer	Head and Neck Squamous Cell Carcinoma	NA	NA	NA	NA	456	71		Negative	NA	NOT HISPANIC OR LATINO	Gross Extension	NA	2011-10-06			C14.8	YES	NA	1970-03-01	C14.8	NO	0	0.6	76	Functional (Limited) Neck Dissection	YES	NA	No	M0	Stage III	T2	N1	N2b	NA	G2	Head & Neck Squamous Cell Carcinoma		NA	HNSC	e303b8c4-6428-4134-bb9d-a95dc1d8e35e	62e8f535-cf5e-4f90-afcd-1e0136066820
TCGA-CQ-6229	Stage II		T2	NO	-22541	hnsc_tcga	Head and Neck Cancer	Head and Neck Squamous Cell Carcinoma	NA	815	NA	NA	NA	61		Close	NA	NOT HISPANIC OR LATINO	No Extranodal Extension	NA	2011-10-06			C02.9	YES	NA	1970-03-01	C02.9	NO	0	0.9	21	Functional (Limited) Neck Dissection	YES	NA	No	M0	Stage III	T2	N1	N0	NA	G2	Head & Neck Squamous Cell Carcinoma		NA	HNSC	a091822c-447a-49a5-8c20-e329df79599c	f01165b0-911a-45b0-ba7d-7cd0e723a2e4
TCGA-CQ-7063	Stage I	M0	T1	NO	-21723	hnsc_tcga	Head and Neck Cancer	Head and Neck Squamous Cell Carcinoma	0	1461	NA	NA	NA	59	NO	Negative	NA	NOT HISPANIC OR LATINO		NA	2012-11-21			C06.9	YES	NA	1970-03-01	C06.9	NO	0	0.6	NA		NO	NA	No					NX	0	G1	Head & Neck Squamous Cell Carcinoma	YES	NA	HNSC	2b2bb108-ca85-4b3e-a6a6-5ffaac487c5e	61cff819-cef5-4a0b-8f2c-0299a09a72e5
TCGA-CQ-7065	Stage II		T2	NO	-14676	hnsc_tcga	Head and Neck Cancer	Head and Neck Squamous Cell Carcinoma	NA	1007	NA	NA	NA	40		Negative	NA	NOT HISPANIC OR LATINO	No Extranodal Extension	NA	2012-01-27			C02.9	YES	NA	1970-03-01	C02.9	NO	0	0.7	39	Functional (Limited) Neck Dissection	YES	NA	No	M0	Stage II	T2	N0	N0	NA	G2	Head & Neck Squamous Cell Carcinoma		NA	HNSC	20ece2ca-8601-4cca-aec5-0a5c0b92594d	65b44ebf-f817-4b29-8fb6-01b07bc2e7d1
TCGA-CQ-7068	Stage II		T2	NO	-29530	hnsc_tcga	Head and Neck Cancer	Head and Neck Squamous Cell Carcinoma	NA	693	NA	NA	NA	80		Negative	NA	NOT HISPANIC OR LATINO	No Extranodal Extension	NA	2012-01-17			C14.8	YES	NA	1970-03-01	C14.8	NO	0	0.9	32	Functional (Limited) Neck Dissection	YES	NA	No	M0	Stage II	T2	N0	N0	NA	G2	Head & Neck Squamous Cell Carcinoma		NA	HNSC	8ebe8c25-5ef9-42d4-9414-8313227b673f	1c86e4af-03ce-477c-be08-0cfa565861b7
TCGA-CQ-7069	Stage II	M0	T2	NO	-28138	hnsc_tcga	Head and Neck Cancer	Head and Neck Squamous Cell Carcinoma	0	901	NA	NA	NA	77	NO	Negative	NA	NOT HISPANIC OR LATINO		NA	2012-11-21			C06.9	YES	NA	1970-03-01	C06.9	NO	0	0.6	28	Modified Radical Neck Dissection	YES	NA	No	M0	Stage II	T2	N0	N0	0	G2	Head & Neck Squamous Cell Carcinoma	NO	NA	HNSC	06060406-0540-4d5a-adeb-4cc46c01c782	a3110644-275b-4f9b-87aa-ec3d39a432e9
TCGA-CQ-7071	Stage III	M0	T2	NO	-27928	hnsc_tcga	Head and Neck Cancer	Head and Neck Squamous Cell Carcinoma	0	877	NA	NA	NA	76	YES	Close	NA	NOT HISPANIC OR LATINO	No Extranodal Extension	NA	2013-08-13			C06.9	YES	NA	1970-03-01	C06.9	NO	0	0.8	22	Functional (Limited) Neck Dissection	YES	NA	No	M0	Stage IVA	T4a	N1	N1	0	G2	Head & Neck Squamous Cell Carcinoma	NO	NA	HNSC	6ecccbf9-bfda-4f5e-9618-3bffaebf4660	fb14e97c-2913-4f5c-9160-5eaf71017983
TCGA-CQ-7072	Stage II	M0	T2	NO	-18841	hnsc_tcga	Head and Neck Cancer	Head and Neck Squamous Cell Carcinoma	12	1950	NA	NA	NA	51	YES	Negative	NA	NOT HISPANIC OR LATINO	No Extranodal Extension	NA	2013-08-13			C02.9	YES	NA	1970-03-01	C02.9	NO	0	1	28	Functional (Limited) Neck Dissection	YES	NA	No	M0	Stage IVA	T4a	N0	N0	7	G3	Head & Neck Squamous Cell Carcinoma	NO	NA	HNSC	d622bcab-5b5a-45a4-8c02-7bcfdbbb781c	e3764a8c-c97d-432e-9b0f-fcab8e6d2113
TCGA-CQ-A4C6	Stage II	M0	T2	NO	-23205	hnsc_tcga	Head and Neck Cancer	Head and Neck Squamous Cell Carcinoma	0	968	847	NA	NA	63	NO	Negative	NA	NOT HISPANIC OR LATINO	No Extranodal Extension	NA	2013-01-24			C06.0	YES	80	1970-03-01	C06.0	NO	0	NA	23	Functional (Limited) Neck Dissection	YES	NA	No	M0	Stage II	T2	N0	N0	0	G2	Head & Neck Squamous Cell Carcinoma	NO	FALSE	HNSC	5D850E54-24BB-4AE6-9E4B-09ECC7E7CFEE	1EEFA36E-8A83-4DA0-BDFD-26BC684C8A94
TCGA-CQ-A4C7	Stage III	M0	T3	NO	-32194	hnsc_tcga	Head and Neck Cancer	Head and Neck Squamous Cell Carcinoma	1	NA	866	NA	353	88	NO	Negative	NA	NOT HISPANIC OR LATINO	Microscopic Extension	NA	2013-01-28			C04.9	YES	60	1970-03-01	C04.9	NO	0	NA	24	Functional (Limited) Neck Dissection	YES	NA	No	M0	Stage II	T2	N0	N1	4	G3	Head & Neck Squamous Cell Carcinoma	YES	FALSE	HNSC	134223BD-5C03-4854-A034-EBD2C527833E	F02BA89C-DC18-477B-B5CA-950025E0A150
TCGA-CQ-A4C9	Stage III	M0	T2	NO	-20732	hnsc_tcga	Head and Neck Cancer	Head and Neck Squamous Cell Carcinoma	NA	613	551	NA	NA	56	YES	Negative	NA		Microscopic Extension	NA	2013-01-28			C04.0	YES	100	1970-03-01	C04.0	NO	0	NA	47	Functional (Limited) Neck Dissection	YES	NA	No	MX		TX	NX	N1	NA	G2	Head & Neck Squamous Cell Carcinoma	YES	FALSE	HNSC	6A0490EA-D9C6-41CF-BEC3-3257E98CC6ED	96708E1B-6796-4D6B-A1BF-857DCF4A2775
TCGA-CQ-A4CB	Stage III	M0	T1	NO	-21574	hnsc_tcga	Head and Neck Cancer	Head and Neck Squamous Cell Carcinoma	24	545	439	NA	NA	59	NO	Negative	NA		No Extranodal Extension	NA	2013-01-28			C04.9	YES	100	1971-03-01	C04.9	NO	0	NA	26	Functional (Limited) Neck Dissection	YES	NA	No	M0	Stage II	T2	N0	N1	7	G2	Head & Neck Squamous Cell Carcinoma	NO	FALSE	HNSC	6826ECE7-1834-4367-B05B-FA92A271E179	8CE8462F-E036-480B-AA7B-ED149D113106
TCGA-CQ-A4CD	Stage IVA	M0	T4a	NO	-25497	hnsc_tcga	Head and Neck Cancer	Head and Neck Squamous Cell Carcinoma	0	548	442	NA	NA	69	YES	Close	NA	NOT HISPANIC OR LATINO	No Extranodal Extension	NA	2013-01-28			C41.1	YES	100	1970-03-01	C41.1	NO	0	NA	47	Functional (Limited) Neck Dissection	YES	NA	No	M0	Stage IVB	T4b	N0	N0	0	G3	Head & Neck Squamous Cell Carcinoma	NO	FALSE	HNSC	15EB8D88-ADB1-4F4F-A44D-087049DB60CE	353C14EE-9EAF-45DC-8E93-934092031C9D
TCGA-CQ-A4CE	Stage II	M0	T2	NO	-27793	hnsc_tcga	Head and Neck Cancer	Head and Neck Squamous Cell Carcinoma	0	393	307	NA	NA	76	NO	Close	NA		No Extranodal Extension	NA	2013-01-28			C02.9	YES	100	1971-03-01	C02.9	NO	0	NA	37	Functional (Limited) Neck Dissection	YES	NA	No	M0	Stage II	T2	N0	N0	0	G2	Head & Neck Squamous Cell Carcinoma	NO	FALSE	HNSC	E1527704-8A97-445F-A5EE-357920CB28F7	F3F57FC3-E8D6-452E-BEAD-EDBE25E4BAD8
TCGA-CQ-A4CG	Stage III	M0	T3	NO	-28637	hnsc_tcga	Head and Neck Cancer	Head and Neck Squamous Cell Carcinoma	0	391	285	NA	NA	78	NO	Close	NA	NOT HISPANIC OR LATINO	No Extranodal Extension	NA	2013-01-28			C06.0	YES	120	1970-03-01	C06.0	NO	0	NA	16	Functional (Limited) Neck Dissection	YES	NA	No	M0	Stage II	T2	N0	N0	0	G2	Head & Neck Squamous Cell Carcinoma	YES	FALSE	HNSC	E7A055D9-8D68-4E6B-BADE-4B2585757210	73479B59-8A67-45BE-AAA5-8BA6770A6D4C
TCGA-CQ-A4CH	Stage II	M0	T2	NO	-21455	hnsc_tcga	Head and Neck Cancer	Head and Neck Squamous Cell Carcinoma	0	303	162	NA	NA	58	YES	Negative	NA	NOT HISPANIC OR LATINO	No Extranodal Extension	NA	2013-01-28			C02.1	YES	120	1970-03-01	C02.1	NO	0	NA	55	Functional (Limited) Neck Dissection	YES	NA	No	M0	Stage IVA	T4a	N2c	N0	0	G2	Head & Neck Squamous Cell Carcinoma	YES	FALSE	HNSC	AE90972D-5BC2-4B53-B5FF-1B8C31F39342	273490D1-9862-4480-86AA-12522B35FE24
TCGA-CQ-A4CI	Stage III	M0	T2	YES	-26664	hnsc_tcga	Head and Neck Cancer	Head and Neck Squamous Cell Carcinoma	0	608	524	NA	NA	73	YES	Close	NA	NOT HISPANIC OR LATINO	No Extranodal Extension	NA	2013-01-28			C06.0	YES	80	1983-03-01	C06.0	NO	0	NA	49	Functional (Limited) Neck Dissection	YES	NA	No	MX		TX	NX	N1	0	G3	Head & Neck Squamous Cell Carcinoma Basaloid Type	YES	FALSE	HNSC	26CB1330-CE48-4006-8155-F6D52D3AB9B6	62776A98-357B-4601-9F23-0531C086EE2A
TCGA-CR-5243			TX		-18812	hnsc_tcga	Head and Neck Cancer	Head and Neck Squamous Cell Carcinoma	0	2562	NA	NA	NA	51			NA	NOT HISPANIC OR LATINO		NA	2011-04-05			C09.9	YES	NA	1970-03-01	C09.9	NO	0	NA	NA		NO	NA	No	M0	Stage IVA	T3	N2b	NX	0	G3	Head & Neck Squamous Cell Carcinoma		NA	HNSC	e37f479f-ca05-45e4-ac6d-a974bed6e7f8	d89d46ea-9a7a-4fd8-b11e-9c9ca4780119
TCGA-CR-5247			TX		-17810	hnsc_tcga	Head and Neck Cancer	Head and Neck Squamous Cell Carcinoma	NA	358	NA	NA	NA	48			NA	NOT HISPANIC OR LATINO		NA	2012-02-28			C09.9	YES	NA	1970-03-01	C09.9	NO	0	NA	NA		NO	NA	No	M0	Stage III	T3	N1	NX	NA	G2	Head & Neck Squamous Cell Carcinoma		NA	HNSC	692b50fc-19ca-4926-84cb-fd7168209e44	43739161-8083-4740-a670-1a334a87ca7e
TCGA-CR-5248			TX		-19441	hnsc_tcga	Head and Neck Cancer	Head and Neck Squamous Cell Carcinoma	NA	1663	NA	NA	NA	53			NA	NOT HISPANIC OR LATINO		NA	2012-02-28			C09.9	YES	NA	1970-03-01	C09.9	NO	0	NA	NA		NO	NA	No	M0	Stage IVA	T4a	N2c	NX	NA	G3	Head & Neck Squamous Cell Carcinoma		NA	HNSC	a9017cd4-df30-46eb-b08f-39540b15243f	0771e98b-4e65-450d-afc2-33d4e30b3df2
TCGA-CR-5250			TX		-26097	hnsc_tcga	Head and Neck Cancer	Head and Neck Squamous Cell Carcinoma	NA	799	NA	NA	NA	71			NA	NOT HISPANIC OR LATINO		NA	2011-04-05	Positive	Positive	C01	YES	NA	1970-03-01	C01.9	NO	0	NA	NA		NO	NA	No	M0	Stage II	T2	N0	NX	NA	G3	Head & Neck Squamous Cell Carcinoma		NA	HNSC	9e178d80-fe90-4998-9dae-726c4beceef7	13ae9411-e63f-4093-a80e-8b64837c001d
TCGA-CR-6467	Stage III	M0	T2		-21689	hnsc_tcga	Head and Neck Cancer	Head and Neck Squamous Cell Carcinoma	0.5	1777	NA	NA	NA	59		Negative	NA	NOT HISPANIC OR LATINO		NA	2011-09-14			C09.9	YES	NA	1970-03-01	C09.9	NO	0	NA	41	Modified Radical Neck Dissection	YES	NA	No	M0	Stage IVA	T2	N2b	N1	7	G3	Head & Neck Squamous Cell Carcinoma		NA	HNSC	89f91e36-fed8-4da3-8a35-c761d6f65285	5ef4d047-5a84-4e03-acf5-02029d8a4cf2
TCGA-CR-6470	Stage II	M0	T2		-14133	hnsc_tcga	Head and Neck Cancer	Head and Neck Squamous Cell Carcinoma	2.5	1521	NA	NA	NA	38		Negative	NA	NOT HISPANIC OR LATINO		NA	2011-09-14			C09.9	YES	NA	1970-03-01	C09.9	NO	0	NA	24	Modified Radical Neck Dissection	YES	NA	No	M0	Stage IVA	T1	N2c	N0	5	G2	Head & Neck Squamous Cell Carcinoma		NA	HNSC	cd032ddb-55f2-4c77-8dcf-e4e630f7de6f	afb7ea63-2959-4e53-95ea-7a032dcb5a8b
TCGA-CR-6471	Stage IVA	M0	T4a	NO	-21315	hnsc_tcga	Head and Neck Cancer	Head and Neck Squamous Cell Carcinoma	NA	NA	NA	NA	1202	58		Positive	NA	NOT HISPANIC OR LATINO	No Extranodal Extension	NA	2011-09-14			C14.8	YES	NA	1970-03-01	C14.8	NO	0	NA	18	Modified Radical Neck Dissection	YES	NA	No	M0	Stage IVA	T4a	N0	N1	NA	G2	Head & Neck Squamous Cell Carcinoma		NA	HNSC	eda29281-e803-4217-8603-d6a388408611	4f845fb4-4724-455f-88f2-09de7259a484
TCGA-CR-6472					-21654	hnsc_tcga	Head and Neck Cancer	Head and Neck Squamous Cell Carcinoma	0	1050	NA	NA	NA	59			NA	NOT HISPANIC OR LATINO		NA	2011-09-14			C01	YES	NA	1970-03-01	C01.9	NO	0	NA	NA		NO	NA	No	M0	Stage IVB	T2	N3		0	G3	Head & Neck Squamous Cell Carcinoma		NA	HNSC	0956bc67-dd55-4c54-a56a-f22f2856662a	76095f05-cd2b-4973-800a-10fe58ee1609
TCGA-CR-6473					-24857	hnsc_tcga	Head and Neck Cancer	Head and Neck Squamous Cell Carcinoma	NA	1125	NA	NA	NA	68			NA	NOT HISPANIC OR LATINO		NA	2011-09-21			C13.9	YES	NA	1970-03-01	C13.9	NO	0	NA	NA		NO	NA	No	M0	Stage IVA	T3	N2b		NA	G3	Head & Neck Squamous Cell Carcinoma		NA	HNSC	e8b0a499-7e9a-4f0e-b552-8e4f284141ed	ed96ee9b-cf03-4eaa-b783-07b739e3a648
TCGA-CR-6474	Stage IVA	M0	T2		-18840	hnsc_tcga	Head and Neck Cancer	Head and Neck Squamous Cell Carcinoma	NA	NA	NA	NA	564	51		Negative	NA	NOT HISPANIC OR LATINO		NA	2011-09-21			C32.9	YES	NA	1970-03-01	C32.9	NO	0	NA	31		YES	NA	No	M0	Stage IVA	T3	N2a	N2b	NA	G2	Head & Neck Squamous Cell Carcinoma		NA	HNSC	9f771c36-16ec-4770-bc53-f6c861343f1c	d84c30b6-e217-4b2c-9dc1-16428264378d
TCGA-CR-6477					-20815	hnsc_tcga	Head and Neck Cancer	Head and Neck Squamous Cell Carcinoma	NA	514	NA	NA	NA	56			NA	NOT HISPANIC OR LATINO		NA	2011-09-28	Negative	Negative	C01	YES	NA	1970-03-01	C01.9	NO	0	NA	NA		NO	NA	No	M0	Stage IVA	T3	N2b		NA	G2	Head & Neck Squamous Cell Carcinoma		NA	HNSC	b74519ff-b338-45e9-9307-008223726dac	824c1d21-7411-4efd-8d38-effe39acb639
TCGA-CR-6478					-24244	hnsc_tcga	Head and Neck Cancer	Head and Neck Squamous Cell Carcinoma	NA	NA	NA	NA	183	66			NA	NOT HISPANIC OR LATINO		NA	2011-09-21			C09.9	YES	NA	1970-03-01	C09.9	NO	0	NA	NA		NO	NA	No	M0	Stage IVA	T3	N2c		1	G3	Head & Neck Squamous Cell Carcinoma		NA	HNSC	467d5c94-1e67-4454-9e9c-9dffaa643032	a26d04d0-1501-4cc7-afea-154a89cff0ff
TCGA-CR-6480					-19472	hnsc_tcga	Head and Neck Cancer	Head and Neck Squamous Cell Carcinoma	NA	362	NA	NA	NA	53			NA	NOT HISPANIC OR LATINO		NA	2011-09-21	Positive	Positive	C09.9	YES	NA	1970-03-01	C09.9	NO	0	NA	NA		NO	NA	No	M0	Stage IVA	T2	N2a		NA	G2	Head & Neck Squamous Cell Carcinoma		NA	HNSC	ba9d4568-71a8-41fc-a2be-0bf784e36d6a	0c6b4631-381e-4b73-ac9e-62bbc1849ff4
TCGA-CR-6481					-17203	hnsc_tcga	Head and Neck Cancer	Head and Neck Squamous Cell Carcinoma	NA	311	NA	NA	NA	47			NA	NOT HISPANIC OR LATINO		NA	2011-09-28	Positive	Positive	C09.9	YES	NA	1970-03-01	C09.9	NO	0	NA	NA		NO	NA	No	M0	Stage IVA	T2	N2a		NA	G2	Head & Neck Squamous Cell Carcinoma		NA	HNSC	9a76bd98-1d2b-4d0f-9772-883520ff6210	04652163-a674-446f-9e86-607de19e4c34
TCGA-CR-6482					-22741	hnsc_tcga	Head and Neck Cancer	Head and Neck Squamous Cell Carcinoma	NA	345	NA	NA	NA	62			NA	NOT HISPANIC OR LATINO		NA	2011-09-28		Positive	C09.9	YES	NA	1970-03-01	C09.9	NO	0	NA	NA		NO	NA	No	M0	Stage IVA	T2	N2b		NA	G3	Head & Neck Squamous Cell Carcinoma		NA	HNSC	468649e7-1525-4b8a-8ab5-ddb27db5f022	92173f97-b46a-4950-8cd8-6729ab9522c5
TCGA-CR-6484	Stage IVA	M0	T4a	NO	-24569	hnsc_tcga	Head and Neck Cancer	Head and Neck Squamous Cell Carcinoma	NA	354	NA	NA	NA	67		Negative	NA	NOT HISPANIC OR LATINO	Gross Extension	NA	2011-09-28	Negative	Negative	C14.8	YES	NA	1970-03-01	C14.8	NO	0	NA	22	Modified Radical Neck Dissection	YES	NA	No	M0	Stage IVA	T4a	N0	N2	NA	G2	Head & Neck Squamous Cell Carcinoma		NA	HNSC	aa10d6da-ba20-43e8-ab8f-a9b4b58738b4	dd093123-3150-4d35-b61d-d2c65e25df17
TCGA-CR-6487	Stage I	M0	T1		-18331	hnsc_tcga	Head and Neck Cancer	Head and Neck Squamous Cell Carcinoma	NA	234	NA	NA	NA	50		Negative	NA	NOT HISPANIC OR LATINO		NA	2011-10-05	Positive	Positive	C09.9	YES	NA	1970-03-01	C09.9	NO	0	NA	NA		NO	NA	No	M0	Stage II	T2	N0	N0	NA	G3	Head & Neck Squamous Cell Carcinoma		NA	HNSC	9ae5101b-6031-4ab1-bfca-198c41af3184	027dedd3-bd53-420e-b7f2-eb5b8c26bcdc
TCGA-CR-6488	Stage II		T2	NO	-25176	hnsc_tcga	Head and Neck Cancer	Head and Neck Squamous Cell Carcinoma	NA	379	NA	NA	NA	68		Negative	NA	NOT HISPANIC OR LATINO		NA	2012-03-01			C02.9	YES	NA	1970-03-01	C02.9	NO	0	NA	22	Modified Radical Neck Dissection	YES	NA	No	M0	Stage II	T2	N0	N0	NA	G2	Head & Neck Squamous Cell Carcinoma		NA	HNSC	f458d21d-1854-4baf-9eb1-79c29b663804	409382c9-7fca-46e7-8862-a5293c245442
TCGA-CR-6491	Stage IVA	M0	T4a	NO	-22125	hnsc_tcga	Head and Neck Cancer	Head and Neck Squamous Cell Carcinoma	NA	350	NA	NA	NA	60		Negative	NA	NOT HISPANIC OR LATINO		NA	2011-10-05	Negative	Negative	C04.9	YES	NA	1970-03-01	C04.9	NO	0	NA	49	Modified Radical Neck Dissection	YES	NA	No	M0	Stage IVA	T4a	NX	N2b	7	G2	Head & Neck Squamous Cell Carcinoma		NA	HNSC	5fce954c-11b9-41f4-9471-4b5bdc0efa7f	e23d2f8b-aca4-43c2-876e-f8c6e1ca2d93
TCGA-CR-6492	Stage III	M0	T2		-28600	hnsc_tcga	Head and Neck Cancer	Head and Neck Squamous Cell Carcinoma	NA	479	NA	NA	NA	78		Negative	NA	NOT HISPANIC OR LATINO	No Extranodal Extension	NA	2012-03-01	Negative	Negative	C05.0	YES	NA	1970-03-01	C05.0	NO	0	NA	37	Modified Radical Neck Dissection	YES	NA	No	M0	Stage IVA	T4a	N1	N1	NA	G3	Head & Neck Squamous Cell Carcinoma		NA	HNSC	a98263a5-cc90-4734-b6f1-f0108bfd5cac	9d258494-fb84-4435-aa3a-f5778ac061c5
TCGA-CR-6493	Stage IVA		T3	NO	-25432	hnsc_tcga	Head and Neck Cancer	Head and Neck Squamous Cell Carcinoma	NA	NA	NA	NA	282	69		Negative	NA	NOT HISPANIC OR LATINO	No Extranodal Extension	NA	2011-10-05			C02.9	YES	NA	1970-03-01	C02.9	NO	0	NA	16	Modified Radical Neck Dissection	YES	NA	No	M0	Stage IVA	T3	N2b	N2b	NA	G2	Head & Neck Squamous Cell Carcinoma		NA	HNSC	b43b8aed-d166-4f00-8144-24ad3fe314ed	8ea97c66-9e91-4067-b11b-920e6bb7def9
TCGA-CR-7364	Stage III	M0	T3		-24192	hnsc_tcga	Head and Neck Cancer	Head and Neck Squamous Cell Carcinoma	NA	1435	NA	NA	NA	66		Negative	NA	NOT HISPANIC OR LATINO		NA	2011-2-00			C32.9	YES	NA	1970-03-01	C32.9	NO	0	0.1	36	Modified Radical Neck Dissection	YES	NA	No	M0	Stage III	T3	N0	N0	NA	G2	Head & Neck Squamous Cell Carcinoma		NA	HNSC	62887787-9385-470a-a993-98ede58f0940	a17406af-2eda-4148-8a0d-ec2ae4bd9fac
TCGA-CR-7365	Stage IVA	M0	T4a		-22101	hnsc_tcga	Head and Neck Cancer	Head and Neck Squamous Cell Carcinoma	NA	1191	NA	NA	NA	60		Negative	NA	NOT HISPANIC OR LATINO		NA	2012-2-00			C14.8	YES	NA	1970-03-01	C14.8	NO	0	0.1	45	Radical Neck Dissection	YES	NA	No	M0	Stage IVA	T4a	N2b	N0	NA	G2	Head & Neck Squamous Cell Carcinoma		NA	HNSC	a8fe444f-57a5-4364-ab55-09f41ecb4591	d5f6bbbf-b482-465e-a4e1-cf5c6502d8f7
TCGA-CR-7367	Stage IVA	M0	T4a	NO	-19116	hnsc_tcga	Head and Neck Cancer	Head and Neck Squamous Cell Carcinoma	6	1440	NA	NA	NA	52		Negative	NA	NOT HISPANIC OR LATINO		NA	2012-2-00			C14.8	YES	NA	1970-03-01	C14.8	NO	0	0.1	30	Modified Radical Neck Dissection	YES	NA	No	M0	Stage IVB	T4a	N3	N1	7	G1	Head & Neck Squamous Cell Carcinoma		NA	HNSC	1c95de68-18d9-429b-b379-878838f88a72	27d6d43b-6dfc-4719-ada6-570c68346fcf
TCGA-CR-7368	Stage IVA	M0	T4a		-19876	hnsc_tcga	Head and Neck Cancer	Head and Neck Squamous Cell Carcinoma	NA	1245	NA	NA	NA	54		Negative	NA	NOT HISPANIC OR LATINO		NA	2012-04-09			C14.8	YES	NA	1970-03-01	C14.8	NO	0	0.1	41	Functional (Limited) Neck Dissection	YES	NA	No	M0	Stage IVA	T4a	N0	N1	NA	G2	Head & Neck Squamous Cell Carcinoma		NA	HNSC	27c28c89-f4e7-4aec-a806-c0da7756e47f	0c4c4b41-05ac-48ce-b5c0-a639ffafc411
TCGA-CR-7369	Stage IVA	M0	T4a	NO	-21897	hnsc_tcga	Head and Neck Cancer	Head and Neck Squamous Cell Carcinoma	NA	NA	NA	NA	1090	59		Negative	NA	NOT HISPANIC OR LATINO		NA	2012-04-09			C14.8	YES	NA	1970-03-01	C14.8	NO	0	0.1	23	Modified Radical Neck Dissection	YES	NA	No	M0	Stage IVA	T4a	N0	N2b	NA	G2	Head & Neck Squamous Cell Carcinoma		NA	HNSC	85a26115-1160-411b-8384-44eedc947fb2	ed6ad3fc-0a81-4258-89a0-133aaa36709e
TCGA-CR-7370			TX		-26468	hnsc_tcga	Head and Neck Cancer	Head and Neck Squamous Cell Carcinoma	NA	105	NA	NA	NA	72		Negative	NA	NOT HISPANIC OR LATINO		NA	2012-04-09			C32.9	YES	NA	1970-03-01	C32.9	NO	0	0.1	NA		NO	NA	No	M0	Stage II	T2	N0	NX	NA	G2	Head & Neck Squamous Cell Carcinoma		NA	HNSC	890b5a8b-703d-428d-8833-bc0ce26e80aa	0e357973-d52d-4fc7-8099-7b87458745e2
TCGA-CR-7371	Stage III	M0	T3		-16568	hnsc_tcga	Head and Neck Cancer	Head and Neck Squamous Cell Carcinoma	NA	NA	NA	NA	94	45		Negative	NA	NOT HISPANIC OR LATINO		NA	2012-2-00			C32.9	YES	NA	1970-03-01	C32.9	NO	0	0.1	104	Modified Radical Neck Dissection	YES	NA	No	M0	Stage III	T3	N0	N1	NA	G2	Head & Neck Squamous Cell Carcinoma		NA	HNSC	f8acc36b-1e7f-44b8-83b7-f894ad201833	ac9f5493-c06b-40dd-b80d-7be718d27289
TCGA-CR-7372	Stage I	M0	T1	NO	-16610	hnsc_tcga	Head and Neck Cancer	Head and Neck Squamous Cell Carcinoma	NA	759	NA	NA	NA	45		Negative	NA	NOT HISPANIC OR LATINO		NA	2012-2-00	Negative	Negative	C02.9	YES	NA	1970-03-01	C02.9	NO	0	0.1	19	Modified Radical Neck Dissection	YES	NA	No	M0	Stage II	T2	N0	N0	NA	G1	Head & Neck Squamous Cell Carcinoma		NA	HNSC	45c3cd39-1c5d-4e26-8afc-5bed3c230088	00ab48d1-6b1c-4663-a9b1-69d22f93af1a
TCGA-CR-7373	Stage IVA	M0	T4a		-24448	hnsc_tcga	Head and Neck Cancer	Head and Neck Squamous Cell Carcinoma	NA	889	NA	NA	NA	66		Negative	NA	NOT HISPANIC OR LATINO		NA	2012-2-00	Negative	Negative	C14.8	YES	NA	1970-03-01	C14.8	NO	0	0.1	19	Modified Radical Neck Dissection	YES	NA	No	M0	Stage IVA	T4a	N2b	N1	NA	G2	Head & Neck Squamous Cell Carcinoma		NA	HNSC	242bdece-75dc-45b9-a9b3-3e1bc305a3e3	2a7e5da7-0da3-4def-8263-33881c22d622
TCGA-CR-7374			TX		-24558	hnsc_tcga	Head and Neck Cancer	Head and Neck Squamous Cell Carcinoma	NA	30	NA	NA	NA	67			NA	NOT HISPANIC OR LATINO		NA	2012-2-00			C32.9	YES	NA	1970-03-01	C32.9	NO	0	0.1	NA		NO	NA	No	M0	Stage II	T2	N0	NX	NA	G2	Head & Neck Squamous Cell Carcinoma		NA	HNSC	fc3ea52b-67ac-4876-949d-5464c436f3db	77be0d91-0525-439f-bb34-3a0702c81085
TCGA-CR-7376	Stage III	M0	T2	YES	-30670	hnsc_tcga	Head and Neck Cancer	Head and Neck Squamous Cell Carcinoma	NA	972	NA	NA	NA	83		Positive	NA	NOT HISPANIC OR LATINO	No Extranodal Extension	NA	2012-04-25	Negative	Negative	C14.8	YES	NA	1970-03-01	C14.8	NO	0	0.1	22	Modified Radical Neck Dissection	YES	NA	No	M0	Stage II	T2	N0	N1	NA	G2	Head & Neck Squamous Cell Carcinoma		NA	HNSC	b3bed685-e9db-436b-9938-2b8a0a0d5b83	1007263a-a0fa-410f-bc99-50c0819a6a8d
TCGA-CR-7377	Stage IVA	M0	T4a	YES	-21371	hnsc_tcga	Head and Neck Cancer	Head and Neck Squamous Cell Carcinoma	NA	NA	NA	NA	279	58		Negative	NA	NOT HISPANIC OR LATINO		NA	2012-2-00			C14.8	YES	NA	1970-03-01	C14.8	NO	0	0.1	29	Modified Radical Neck Dissection	YES	NA	No	M0	Stage IVA	T4a	N1	N2c	NA	G3	Head & Neck Squamous Cell Carcinoma		NA	HNSC	f76ab158-2cf9-4df7-b6fe-727dd69a369f	6dc6b8a7-5e68-4ef8-9e8a-849eb9f2fede
TCGA-CR-7379	Stage IVA	M0	T4a	NO	-28763	hnsc_tcga	Head and Neck Cancer	Head and Neck Squamous Cell Carcinoma	NA	1036	NA	NA	NA	78		Negative	NA	NOT HISPANIC OR LATINO		NA	2012-2-00	Negative	Negative	C14.8	YES	NA	1970-03-01	C14.8	NO	0	0.1	33	Modified Radical Neck Dissection	YES	NA	No	M0	Stage IVA	T4a	N2b	N2b	NA	G2	Head & Neck Squamous Cell Carcinoma		NA	HNSC	dea53b7f-3e7d-41a3-ae2d-58548fe0b595	262d3cf5-c3b4-4622-b041-a6a7e131ac8e
TCGA-CR-7380	Stage IVB		T4b	NO	-21215	hnsc_tcga	Head and Neck Cancer	Head and Neck Squamous Cell Carcinoma	0	NA	NA	NA	606	58		Positive	NA	NOT HISPANIC OR LATINO		NA	2012-2-00			C14.8	YES	NA	1970-03-01	C14.8	NO	0	0.1	17	Modified Radical Neck Dissection	YES	NA	No	M0	Stage III	T3	N0	N0	0	G2	Head & Neck Squamous Cell Carcinoma		NA	HNSC	53b254b7-021f-43df-af9b-3fc01b87479e	97e9e40e-8e50-4c48-9431-66fb3e0e9fef
TCGA-CR-7382	Stage IVA	M0	T2		-18078	hnsc_tcga	Head and Neck Cancer	Head and Neck Squamous Cell Carcinoma	NA	796	NA	NA	NA	49		Negative	NA	NOT HISPANIC OR LATINO	No Extranodal Extension	NA	2012-04-25			C02.9	YES	NA	1970-03-01	C02.9	NO	0	0.1	83	Modified Radical Neck Dissection	YES	NA	No	M0	Stage IVA	T2	N2c	N2c	NA	G2	Head & Neck Squamous Cell Carcinoma		NA	HNSC	f030e410-2585-461e-ad23-9fdf026ac06c	a8d8886b-b422-4c66-b0b4-4c9f0546b1b3
TCGA-CR-7383	Stage I	M0	T1		-29122	hnsc_tcga	Head and Neck Cancer	Head and Neck Squamous Cell Carcinoma	NA	NA	NA	NA	521	79		Negative	NA	NOT HISPANIC OR LATINO		NA	2012-04-25			C09.9	YES	NA	1970-03-01	C09.9	NO	0	0.1	21	Modified Radical Neck Dissection	YES	NA	No	M0	Stage I	T1	N0	N0	NA	G2	Head & Neck Squamous Cell Carcinoma		NA	HNSC	16779eed-f386-4e8f-8475-04d33b9dd160	6237b644-9903-4f45-8b07-6c610b1342b8
TCGA-CR-7385		M0	T1	YES	-15477	hnsc_tcga	Head and Neck Cancer	Head and Neck Squamous Cell Carcinoma	2	997	NA	NA	NA	42		Negative	NA	NOT HISPANIC OR LATINO		NA	2012-02-15			C09.9	YES	NA	1970-03-01	C09.9	NO	0	0.1	NA		NO	NA	No	M0	Stage IVA	T2	N2b	NX	NA	G2	Head & Neck Squamous Cell Carcinoma		NA	HNSC	9f89510c-ed07-471f-b35e-7c87c237b9fe	4c4a6867-babe-4032-a639-a9b31cdddc6c
TCGA-CR-7386	Stage IVA	M0	T4a		-25238	hnsc_tcga	Head and Neck Cancer	Head and Neck Squamous Cell Carcinoma	1	1430	NA	NA	NA	69		Positive	NA	NOT HISPANIC OR LATINO		NA	2012-02-15			C14.8	YES	NA	1970-03-01	C14.8	NO	0	0.1	47	Modified Radical Neck Dissection	YES	NA	No	M0	Stage IVA	T4a	N1	N2c	1	G1	Head & Neck Squamous Cell Carcinoma		NA	HNSC	3f2e0c8a-6d5f-4763-be60-5a70994d31a1	d266446d-fbbf-4814-9805-04c865ae6fba
TCGA-CR-7388			TX		-25728	hnsc_tcga	Head and Neck Cancer	Head and Neck Squamous Cell Carcinoma	NA	NA	NA	NA	823	70			NA	NOT HISPANIC OR LATINO		NA	2012-02-15			C32.9	YES	NA	1970-03-01	C32.9	NO	0	0.1	NA		NO	NA	No	M0	Stage IVA	T2	N2	NX	NA	G2	Head & Neck Squamous Cell Carcinoma		NA	HNSC	511b1de1-b855-47bb-a2f8-58dc5792be47	f27e3255-bc73-4943-8201-5245b85c4ee5
TCGA-CR-7389			TX		-20169	hnsc_tcga	Head and Neck Cancer	Head and Neck Squamous Cell Carcinoma	1	392	NA	NA	NA	55			NA	NOT HISPANIC OR LATINO		NA	2012-02-15			C32.9	YES	NA	1970-03-01	C32.9	NO	0	0.1	NA		NO	NA	No	M0	Stage III	T2	N1	NX	1	G2	Head & Neck Squamous Cell Carcinoma		NA	HNSC	5422a86d-f9ff-4fb6-873e-bf7cc3de50e5	9c35c1ec-5ca6-4900-aa39-ab1c962b9c4d
TCGA-CR-7390	Stage IVA	M0	T4a		-24575	hnsc_tcga	Head and Neck Cancer	Head and Neck Squamous Cell Carcinoma	6	907	NA	NA	NA	67		Negative	NA	NOT HISPANIC OR LATINO	No Extranodal Extension	NA	2012-02-16	Negative	Negative	C02.9	YES	NA	1970-03-01	C02.9	NO	0	0.1	16	Modified Radical Neck Dissection	YES	NA	No	M0	Stage III	T3	N0	N0	7	G2	Head & Neck Squamous Cell Carcinoma		NA	HNSC	67f2ac9b-b9fb-4ffd-ae60-6ff1114e9290	680bd13d-c418-4829-9031-82031175657d
TCGA-CR-7391	Stage I	M0	T1	NO	-13508	hnsc_tcga	Head and Neck Cancer	Head and Neck Squamous Cell Carcinoma	NA	913	NA	NA	NA	36		Negative	NA	NOT HISPANIC OR LATINO	No Extranodal Extension	NA	2012-02-16	Negative	Negative	C02.9	YES	NA	1970-03-01	C02.9	NO	0	0.1	10	Modified Radical Neck Dissection	YES	NA	No	M0	Stage I	T1	N0	N0	NA	G1	Head & Neck Squamous Cell Carcinoma		NA	HNSC	832316ee-08ab-412b-9e4d-8a57ff84bc11	54b7db2e-f0dd-469d-81bb-4e2a86ebea9d
TCGA-CR-7392	Stage IVA	M0	T3		-24650	hnsc_tcga	Head and Neck Cancer	Head and Neck Squamous Cell Carcinoma	NA	946	NA	NA	NA	67			NA	NOT HISPANIC OR LATINO	No Extranodal Extension	NA	2012-02-16	Negative	Negative	C02.9	YES	NA	1970-03-01	C02.9	NO	0	0.1	36	Modified Radical Neck Dissection	YES	NA	No	M0	Stage IVA	T3	N2b	N2b	NA	G1	Head & Neck Squamous Cell Carcinoma		NA	HNSC	03aca47b-7653-4938-9178-ed7c37eee6d5	1e14ddca-ef58-419d-bf95-a26f3a3c90ea
TCGA-CR-7393	Stage III	M0	T1	NO	-9750	hnsc_tcga	Head and Neck Cancer	Head and Neck Squamous Cell Carcinoma	NA	908	NA	NA	NA	26		Negative	NA	NOT HISPANIC OR LATINO	No Extranodal Extension	NA	2012-02-16	Negative	Negative	C02.9	YES	NA	1970-03-01	C02.9	NO	0	0.1	44	Modified Radical Neck Dissection	YES	NA	No	M0	Stage I	T1	N0	N1	NA	G2	Head & Neck Squamous Cell Carcinoma		NA	HNSC	0f4bb968-6e10-4a86-a03e-37b61d084f31	a67ee283-5035-40ee-a02f-f55f4f9676d2
TCGA-CR-7394	Stage IVA	M0	T4a		-25581	hnsc_tcga	Head and Neck Cancer	Head and Neck Squamous Cell Carcinoma	NA	898	NA	NA	NA	70		Negative	NA	NOT HISPANIC OR LATINO		NA	2012-02-16	Negative	Negative	C02.9	YES	NA	1970-03-01	C02.9	NO	0	0.1	57	Modified Radical Neck Dissection	YES	NA	No	M0	Stage IVA	T3	N2c	N0	NA	G2	Head & Neck Squamous Cell Carcinoma		NA	HNSC	d296cdb5-a0f6-40cc-8ce7-73e4ccd176f3	0454d779-7645-4509-ac03-85f29e1871c2
TCGA-CR-7395	Stage II	M0	T2	NO	-29527	hnsc_tcga	Head and Neck Cancer	Head and Neck Squamous Cell Carcinoma	NA	930	NA	NA	NA	80		Negative	NA	NOT HISPANIC OR LATINO		NA	2012-02-16	Negative	Negative	C14.8	YES	NA	1970-03-01	C14.8	NO	0	0.1	NA		NO	NA	No	M0	Stage II	T2	N0	N0	NA	G2	Head & Neck Squamous Cell Carcinoma		NA	HNSC	a6622196-897f-469e-a21d-c4a12ed39908	6a888225-823f-4ef1-a3a1-99e7cd7680f1
TCGA-CR-7397	Stage IVA	M0	T3	NO	-16351	hnsc_tcga	Head and Neck Cancer	Head and Neck Squamous Cell Carcinoma	1	216	NA	NA	NA	44		Negative	NA	NOT HISPANIC OR LATINO	No Extranodal Extension	NA	2012-02-17			C02.9	YES	NA	1970-03-01	C02.9	NO	0	0.1	34	Modified Radical Neck Dissection	YES	NA	No	M0	Stage IVA	T3	N2b	N2b	1	G2	Head & Neck Squamous Cell Carcinoma		NA	HNSC	a40bb4bc-9ee6-4a8b-8a33-3a4ed78f69a7	fd765aed-3665-47c9-b1d7-d25ea1e519ec
TCGA-CR-7398	Stage II		T2	NO	-19468	hnsc_tcga	Head and Neck Cancer	Head and Neck Squamous Cell Carcinoma	NA	156	NA	NA	NA	53		Negative	NA	NOT HISPANIC OR LATINO	No Extranodal Extension	NA	2012-02-17			C32.9	YES	NA	1970-03-01	C32.9	NO	0	0.1	23	Modified Radical Neck Dissection	YES	NA	No	M0	Stage II	T2	N0	N0	NA	G2	Head & Neck Squamous Cell Carcinoma		NA	HNSC	e189f082-c748-43d4-96ce-0c381e376531	13348e4e-8b8e-44b5-83e6-a1159a53ea35
TCGA-CR-7399	Stage IVA	M0	T3		-22182	hnsc_tcga	Head and Neck Cancer	Head and Neck Squamous Cell Carcinoma	NA	181	NA	NA	NA	60		Negative	NA	NOT HISPANIC OR LATINO		NA	2012-2-00			C32.9	YES	NA	1970-03-01	C32.9	NO	0	0.1	57		YES	NA	No	M0	Stage IVA	T4a	N2c	N2c	NA	G3	Head & Neck Squamous Cell Carcinoma		NA	HNSC	ed6ac43c-d921-4342-aeec-9ff8d8a31919	05c3d8a0-47a2-44b2-b0c3-144ec0cb2673
TCGA-CR-7401	Stage I	M0	T1	NO	-23420	hnsc_tcga	Head and Neck Cancer	Head and Neck Squamous Cell Carcinoma	NA	1077	NA	NA	NA	64		Negative	NA	NOT HISPANIC OR LATINO	No Extranodal Extension	NA	2012-02-28			C02.9	YES	NA	1970-03-01	C02.9	NO	0	0.1	27	Modified Radical Neck Dissection	YES	NA	No	M0	Stage I	T1	N0	N0	NA	G2	Head & Neck Squamous Cell Carcinoma		NA	HNSC	e2e64c5d-44ba-42f0-ab9d-ec16b21d2545	0a8bb946-8572-4785-bc18-100c838d4660
TCGA-CR-7402			TX		-25138	hnsc_tcga	Head and Neck Cancer	Head and Neck Squamous Cell Carcinoma	NA	911	NA	NA	NA	68			NA	NOT HISPANIC OR LATINO		NA	2012-02-28			C32.9	YES	NA	1970-03-01	C32.9	NO	0	0.1	NA		NO	NA	No	M0	Stage III	T3	N0	NX	NA	G2	Head & Neck Squamous Cell Carcinoma		NA	HNSC	91e30123-2265-4cf1-8389-f6462897837c	b86e8a21-6937-4299-89f6-05f51888f5d8
TCGA-CR-7404			TX		-19532	hnsc_tcga	Head and Neck Cancer	Head and Neck Squamous Cell Carcinoma	NA	1472	NA	NA	NA	53			NA	NOT HISPANIC OR LATINO		NA	2012-04-09	Positive	Positive	C09.9	YES	NA	1970-03-01	C09.9	NO	0	0.2	NA		NO	NA	No	M0	Stage IVA	T3	N2b	NX	NA	G2	Head & Neck Squamous Cell Carcinoma		NA	HNSC	d189a6c6-210f-4957-b500-457d5ce3f867	a39131b9-e7c7-4385-a1b9-d8a0a0950337
TCGA-CV-5430	Stage IVA		T4a	NO	-22577	hnsc_tcga	Head and Neck Cancer	Head and Neck Squamous Cell Carcinoma	NA	4115	NA	NA	NA	61		Negative	NA	HISPANIC OR LATINO	Gross Extension	NA	2011-05-23			C32.9	YES	NA	1970-03-01	C32.9	NO	0	0.9	9	Functional (Limited) Neck Dissection	YES	NA	No	M0	Stage IVA	T4a	N2b	N2a	NA	G3	Head & Neck Squamous Cell Carcinoma		NA	HNSC	a4fcb7fd-9c22-4486-99c5-97da050c9fb3	5d293d68-61ae-49ad-bfcc-e0bdb91cc29e
TCGA-CV-5431	Stage IVA		T3	NO	-26953	hnsc_tcga	Head and Neck Cancer	Head and Neck Squamous Cell Carcinoma	2	522	NA	NA	522	73		Negative	NA	HISPANIC OR LATINO	No Extranodal Extension	NA	2011-03-23			C32.9	YES	NA	1970-03-01	C32.9	NO	0	0.6	29	Functional (Limited) Neck Dissection	YES	NA	No	M0	Stage IVA	T3	N2	N2c	7	G3	Head & Neck Squamous Cell Carcinoma		NA	HNSC	64bb5550-2735-4401-a0db-58ec1020a32d	be567c0a-3833-45d7-b846-d229a8e16e16
TCGA-CV-5432	Stage III		T3	NO	-25006	hnsc_tcga	Head and Neck Cancer	Head and Neck Squamous Cell Carcinoma	NA	3930	NA	NA	NA	68		Negative	NA	NOT HISPANIC OR LATINO	No Extranodal Extension	NA	2011-05-23			C32.9	YES	NA	1970-03-01	C32.9	NO	0	0.9	65	Functional (Limited) Neck Dissection	YES	NA	No	M0	Stage III	T3	N0	N0	NA	G3	Head & Neck Squamous Cell Carcinoma		NA	HNSC	d89b1fd6-bef4-4803-8ed3-3b442be600b6	b4a36114-80d3-4f28-b85a-077dc31eb485
TCGA-CV-5434	Stage IVA		T4a	YES	-22182	hnsc_tcga	Head and Neck Cancer	Head and Neck Squamous Cell Carcinoma	NA	3295	NA	NA	3314	60		Negative	NA	NOT HISPANIC OR LATINO	Gross Extension	NA	2011-05-23			C32.9	YES	NA	1970-03-01	C32.9	NO	0	0.8	30	Functional (Limited) Neck Dissection	YES	NA	No	M0	Stage IVA	T4a	N1	N2b	NA	G2	Head & Neck Squamous Cell Carcinoma		NA	HNSC	dbe29e97-f111-41d3-a25f-3b9eb9bb099f	dc649d39-482d-4855-b9e3-129552e5e421
TCGA-CV-5435	Stage IVA		T4a	NO	-20926	hnsc_tcga	Head and Neck Cancer	Head and Neck Squamous Cell Carcinoma	NA	1438	NA	NA	2319	57		Negative	NA	NOT HISPANIC OR LATINO	No Extranodal Extension	NA	2011-05-23			C32.9	YES	NA	1970-03-01	C32.9	NO	0	1	66	Functional (Limited) Neck Dissection	YES	NA	No	M0	Stage IVA	T4a	N0	N2b	7	G3	Head & Neck Squamous Cell Carcinoma		NA	HNSC	cc23a09b-bca7-43e0-9ad0-bf272848492e	d2491655-a4a1-4e4b-8f94-f50dc1c5d64c
TCGA-CV-5436	Stage IVA		T3	NO	-23923	hnsc_tcga	Head and Neck Cancer	Head and Neck Squamous Cell Carcinoma	12	584	NA	NA	584	65		Negative	NA	HISPANIC OR LATINO	Microscopic Extension	NA	2011-03-30			C04.9	YES	NA	1970-03-01	C04.9	NO	0	0.6	51	Functional (Limited) Neck Dissection	YES	NA	No	M0	Stage IVA	T3	N2b	N2b	7	G2	Head & Neck Squamous Cell Carcinoma		NA	HNSC	94a47bf8-f673-45cb-a8d3-1031317d03b3	f0c384d4-f323-4986-88e9-9de4dde0b33a
TCGA-CV-5439	Stage IVA		T3		-22686	hnsc_tcga	Head and Neck Cancer	Head and Neck Squamous Cell Carcinoma	NA	546	NA	NA	546	62		Negative	NA	NOT HISPANIC OR LATINO	Gross Extension	NA	2011-05-23			C01	YES	NA	1970-03-01	C01.9	NO	0	0.9	33	Functional (Limited) Neck Dissection	YES	NA	No	M0	Stage II	T2	N0	N2b	NA	G2	Head & Neck Squamous Cell Carcinoma		NA	HNSC	3ee863da-7991-414f-82d8-2b6502d4c061	c94d8e61-8a15-4702-90ef-37616f1c015b
TCGA-CV-5440	Stage IVA		T4a	YES	-19197	hnsc_tcga	Head and Neck Cancer	Head and Neck Squamous Cell Carcinoma	1	2732	NA	NA	NA	52		Negative	NA	NOT HISPANIC OR LATINO	Microscopic Extension	NA	2011-03-30			C32.9	YES	NA	1970-03-01	C32.9	NO	0	0.9	47	Functional (Limited) Neck Dissection	YES	NA	No	M0	Stage IVA	T4a	N2b	N2b	7	G3	Head & Neck Squamous Cell Carcinoma		NA	HNSC	10d0a058-3e5e-4916-84c4-25f934b96f86	28780b51-0b53-4d73-b399-ec90b45de0d3
TCGA-CV-5441	Stage IVA		T4a	YES	-21305	hnsc_tcga	Head and Neck Cancer	Head and Neck Squamous Cell Carcinoma	6	2663	NA	NA	NA	58		Negative	NA	NOT HISPANIC OR LATINO	No Extranodal Extension	NA	2011-03-30			C32.9	YES	NA	1970-03-01	C32.9	NO	0	1	62	Radical Neck Dissection	YES	NA	No	M0	Stage IVA	T4a	N1	N2b	7	G3	Head & Neck Squamous Cell Carcinoma		NA	HNSC	c72ae014-3c05-47f9-8615-6633467bc532	3f583e59-c92a-4257-8098-5d081642dea7
TCGA-CV-5442	Stage IVA		T4a		-28040	hnsc_tcga	Head and Neck Cancer	Head and Neck Squamous Cell Carcinoma	NA	2327	NA	NA	NA	76			NA	NOT HISPANIC OR LATINO	No Extranodal Extension	NA	2011-03-30			C05.0	YES	NA	1970-03-01	C05.0	NO	0	1	33	Functional (Limited) Neck Dissection	YES	NA	No	M0	Stage IVA	T4a	N2b	N2b	NA	G3	Head & Neck Squamous Cell Carcinoma		NA	HNSC	3c975b68-4a6e-4c97-a8d1-b9a427d4957c	698208bb-7272-4ad5-9cc0-909cb669bdaf
TCGA-CV-5443	Stage III		T3	NO	-23287	hnsc_tcga	Head and Neck Cancer	Head and Neck Squamous Cell Carcinoma	NA	2567	NA	NA	NA	63		Negative	NA	NOT HISPANIC OR LATINO	No Extranodal Extension	NA	2011-03-30			C32.9	YES	NA	1970-03-01	C32.9	NO	0	1	11	Functional (Limited) Neck Dissection	YES	NA	No	M0	Stage III	T3	N1	N0	NA	G3	Head & Neck Squamous Cell Carcinoma		NA	HNSC	180036a2-3b56-405e-a1fe-d5932517b6c7	746322c7-fe75-4b9f-9309-93e9cfa4cb5a
TCGA-CV-5444	Stage IVA		T4a	NO	-23650	hnsc_tcga	Head and Neck Cancer	Head and Neck Squamous Cell Carcinoma	2	1969	NA	NA	NA	64			NA	NOT HISPANIC OR LATINO	Microscopic Extension	NA	2011-03-30			C32.9	YES	NA	1970-03-01	C32.9	NO	0	0.5	21	Functional (Limited) Neck Dissection	YES	NA	No	M0	Stage IVA	T4a	N0	N1	5	G3	Head & Neck Squamous Cell Carcinoma		NA	HNSC	4eacd173-025a-442b-8bce-890ccfdca586	8cc840ea-3053-41a2-a325-6e86f3deeec6
TCGA-CV-5966	Stage IVA		T4a	YES	-23119	hnsc_tcga	Head and Neck Cancer	Head and Neck Squamous Cell Carcinoma	2	NA	NA	NA	545	63		Negative	NA	NOT HISPANIC OR LATINO	No Extranodal Extension	NA	2011-05-12			C14.8	YES	NA	1970-03-01	C14.8	NO	0	1.5	23	Functional (Limited) Neck Dissection	YES	NA	No	M0	Stage IVA	T4a	N1	N1	7	G3	Head & Neck Squamous Cell Carcinoma		NA	HNSC	0d0731e2-8d82-4b6d-9258-2896a770a868	e71c33e9-1f74-4cf6-b6bf-985d0c96f71e
TCGA-CV-5970	Stage IVA		T4a	NO	-21890	hnsc_tcga	Head and Neck Cancer	Head and Neck Squamous Cell Carcinoma	NA	406	NA	NA	406	59		Negative	NA	HISPANIC OR LATINO	No Extranodal Extension	NA	2011-05-12			C02.9	YES	NA	1970-03-01	C02.9	NO	0	0.8	50	Functional (Limited) Neck Dissection	YES	NA	No	M0	Stage IVA	T4a	N2b	N2b	NA	G2	Head & Neck Squamous Cell Carcinoma		NA	HNSC	1f6167d9-c99d-4873-8d6e-e62a1c964135	4df92618-5e63-46d7-8526-846932bce3c2
TCGA-CV-5971	Stage IVA		T4a	NO	-22279	hnsc_tcga	Head and Neck Cancer	Head and Neck Squamous Cell Carcinoma	NA	540	NA	NA	NA	60		Negative	NA	NOT HISPANIC OR LATINO	No Extranodal Extension	NA	2011-05-12			C02.9	YES	NA	1970-03-01	C02.9	NO	0	0.9	26	Functional (Limited) Neck Dissection	YES	NA	No	M0	Stage IVA	T2	N2b	N2a	NA	G2	Head & Neck Squamous Cell Carcinoma		NA	HNSC	1465b7ec-8d2b-47dd-8387-977eed44cc86	82589b3f-bd41-4abe-9469-7dd48447dddc
TCGA-CV-5973	Stage III		T3	NO	-22771	hnsc_tcga	Head and Neck Cancer	Head and Neck Squamous Cell Carcinoma	NA	1737	NA	NA	NA	62		Negative	NA	NOT HISPANIC OR LATINO	No Extranodal Extension	NA	2011-05-12			C02.9	YES	NA	1970-03-01	C02.9	NO	0	0.8	58	Functional (Limited) Neck Dissection	YES	NA	No	M0	Stage III	T3	N0	N1	NA	G3	Head & Neck Squamous Cell Carcinoma		NA	HNSC	8fc1f1be-d2d5-4b3a-9973-f4d964018beb	5078222f-b257-4286-a29a-bc1e395149bc
TCGA-CV-5976	Stage IVA		T4a	NO	-18267	hnsc_tcga	Head and Neck Cancer	Head and Neck Squamous Cell Carcinoma	NA	1478	NA	NA	NA	50		Negative	NA	NOT HISPANIC OR LATINO	No Extranodal Extension	NA	2011-05-12			C02.9	YES	NA	1970-03-01	C02.9	NO	0	1	50	Functional (Limited) Neck Dissection	YES	NA	No	M0	Stage III	T3	N1	N2b	NA	G2	Head & Neck Squamous Cell Carcinoma		NA	HNSC	23062172-7361-4e61-8ee6-b0a613d72a24	eef68956-d624-4cd0-9c48-28faf052c5f9
TCGA-CV-5977	Stage IVA		T3	YES	-24115	hnsc_tcga	Head and Neck Cancer	Head and Neck Squamous Cell Carcinoma	6	1007	NA	NA	NA	66		Negative	NA	NOT HISPANIC OR LATINO	No Extranodal Extension	NA	2011-05-12			C02.9	YES	NA	1970-03-01	C02.9	NO	0	1	82	Functional (Limited) Neck Dissection	YES	NA	No	M0	Stage III	T3	N1	N2b	6	G2	Head & Neck Squamous Cell Carcinoma		NA	HNSC	50239d1d-b3a4-4240-ab83-b24ba67b1299	84756ab5-9cb6-4dbd-848c-a85804f22aa1
TCGA-CV-5978	Stage IVB		T4a	NO	-19480	hnsc_tcga	Head and Neck Cancer	Head and Neck Squamous Cell Carcinoma	NA	215	NA	NA	215	53		Negative	NA	NOT HISPANIC OR LATINO	No Extranodal Extension	NA	2011-05-12			C32.9	YES	NA	1970-03-01	C32.9	NO	0	0.8	55	Functional (Limited) Neck Dissection	YES	NA	No	M0	Stage IVB	T4a	N3	N3	NA	G2	Head & Neck Squamous Cell Carcinoma		NA	HNSC	e16e9535-b20f-4c9a-8b5b-82df80c99448	7560ec6d-e0f2-4b55-88bf-62e7173126a1
TCGA-CV-5979	Stage IVA		T2	YES	-9567	hnsc_tcga	Head and Neck Cancer	Head and Neck Squamous Cell Carcinoma	NA	1315	NA	NA	NA	26		Negative	NA	NOT HISPANIC OR LATINO	No Extranodal Extension	NA	2011-05-12			C02.9	YES	NA	1970-03-01	C02.9	NO	0	0.6	55	Functional (Limited) Neck Dissection	YES	NA	No	M0	Stage III	T3	N1	N2b	NA	G2	Head & Neck Squamous Cell Carcinoma		NA	HNSC	1e05fdbd-c80b-41c6-9b40-8a7200c92e76	8e0b3dea-be82-4c66-8a5f-a41ff1774fa9
TCGA-CV-6003	Stage III		T2	NO	-18600	hnsc_tcga	Head and Neck Cancer	Head and Neck Squamous Cell Carcinoma	12	1246	NA	NA	NA	50		Negative	NA	NOT HISPANIC OR LATINO	No Extranodal Extension	NA	2011-05-12			C02.9	YES	NA	1970-03-01	C02.9	NO	0	0.7	23	Functional (Limited) Neck Dissection	YES	NA	No	M0	Stage II	T2	N0	N1	7	G2	Head & Neck Squamous Cell Carcinoma		NA	HNSC	417b357e-c90e-4b63-ae7a-4b782038ffd3	6892f7e3-630e-45b5-8c30-139161461a85
TCGA-CV-6433	Stage II		T2	NO	-20855	hnsc_tcga	Head and Neck Cancer	Head and Neck Squamous Cell Carcinoma	4	405	NA	NA	NA	57		Negative	NA	NOT HISPANIC OR LATINO	No Extranodal Extension	NA	2011-05-13			C02.9	YES	NA	1970-03-01	C02.9	NO	0	0.8	5	Functional (Limited) Neck Dissection	YES	NA	No	M0	Stage II	T2	N0	N0	7	G3	Head & Neck Squamous Cell Carcinoma		NA	HNSC	d5eedfb5-4fa3-4a1e-ad0d-ea550b22a5ba	47ec5010-4353-493b-ab28-c95bc2cb026c
TCGA-CV-6436	Stage IVA		T4a	NO	-22885	hnsc_tcga	Head and Neck Cancer	Head and Neck Squamous Cell Carcinoma	NA	743	NA	NA	NA	62		Negative	NA	NOT HISPANIC OR LATINO	No Extranodal Extension	NA	2011-05-13			C02.9	YES	NA	1970-03-01	C02.9	NO	0	0.9	40	Functional (Limited) Neck Dissection	YES	NA	No	M0	Stage III	T3	N0	N0	NA	G1	Head & Neck Squamous Cell Carcinoma		NA	HNSC	84fd72d1-f79d-493b-a341-826acd4aa942	6466056e-1cd6-46bd-9093-1493049fcaf0
TCGA-CV-6441	Stage III		T3	NO	-22025	hnsc_tcga	Head and Neck Cancer	Head and Neck Squamous Cell Carcinoma	NA	NA	NA	NA	292	60		Negative	NA	HISPANIC OR LATINO	No Extranodal Extension	NA	2011-05-13			C02.9	YES	NA	1970-03-01	C02.9	NO	0	0.7	44	Functional (Limited) Neck Dissection	YES	NA	No	M0	Stage III	T3	N0	N0	7	G3	Head & Neck Squamous Cell Carcinoma		NA	HNSC	59398d50-45cf-4812-a24e-0c00c0199971	192c9f36-08ec-4f7f-8137-1a9bd0282d98
TCGA-CV-6933	Stage III		T3		-19518	hnsc_tcga	Head and Neck Cancer	Head and Neck Squamous Cell Carcinoma	0	NA	NA	NA	2741	53		Negative	NA	NOT HISPANIC OR LATINO	No Extranodal Extension	NA	2011-09-09			C02.9	YES	NA	1970-03-01	C02.9	NO	0	0.7	32	Functional (Limited) Neck Dissection	YES	NA	No	M0	Stage IVA	T4a	N0	N1	0	G2	Head & Neck Squamous Cell Carcinoma		NA	HNSC	2a749317-0156-4213-8482-b2c2d6e52e9b	8c57c9e6-75bd-442c-984d-3709d2ac4cec
TCGA-CV-6934	Stage IVA		T3		-24180	hnsc_tcga	Head and Neck Cancer	Head and Neck Squamous Cell Carcinoma	NA	NA	NA	NA	65	66		Negative	NA	NOT HISPANIC OR LATINO		NA	2011-09-13			C02.9	YES	NA	1970-03-01	C02.9	NO	0	2	19	Functional (Limited) Neck Dissection	YES	NA	No	M0	Stage IVA	T3	N2b	N2b	NA	G2	Head & Neck Squamous Cell Carcinoma		NA	HNSC	4f5bc340-bdb5-418a-b3c4-96ac85e08b34	7bf29fd5-11aa-470e-af8b-81e3db80e8d5
TCGA-CV-6935	Stage IVA		T3	YES	-24799	hnsc_tcga	Head and Neck Cancer	Head and Neck Squamous Cell Carcinoma	0	NA	NA	NA	295	67		Negative	NA	NOT HISPANIC OR LATINO		NA	2011-09-09			C32.9	YES	NA	1970-03-01	C32.9	NO	0	2	4		YES	NA	No	M0	Stage III	T3	N0	N2c	0	G3	Head & Neck Squamous Cell Carcinoma		NA	HNSC	0871333c-1088-4af1-a365-12256643c5bd	6883e88c-05a5-4ae7-a43f-40d4f35a3a2d
TCGA-CV-6936	Stage IVA		T4a	YES	-25020	hnsc_tcga	Head and Neck Cancer	Head and Neck Squamous Cell Carcinoma	0	NA	NA	NA	166	68			NA	NOT HISPANIC OR LATINO		NA	2011-09-13			C04.9	YES	NA	1970-03-01	C04.9	NO	0	1.1	10	Functional (Limited) Neck Dissection	YES	NA	No	M0	Stage IVA	T4a	N2b	N2c	0	G2	Head & Neck Squamous Cell Carcinoma		NA	HNSC	93a265b7-6c23-4e5f-b797-c117793744bf	6862feca-6c9e-4e33-9900-c27e21e0f430
TCGA-CV-6937	Stage II		T2		-26156	hnsc_tcga	Head and Neck Cancer	Head and Neck Squamous Cell Carcinoma	NA	NA	NA	NA	624	71		Negative	NA	NOT HISPANIC OR LATINO		NA	2011-09-13			C14.8	YES	NA	1970-03-01	C14.8	NO	0	1.5	NA		NO	NA	No	M0	Stage II	T2	N0	N0	NA	G2	Head & Neck Squamous Cell Carcinoma		NA	HNSC	f3a592bc-40c6-4453-9008-630b073e5e8c	74cd6b5c-6724-4503-b489-9e4fd8c08feb
TCGA-CV-6938	Stage II		T2		-31825	hnsc_tcga	Head and Neck Cancer	Head and Neck Squamous Cell Carcinoma	NA	NA	NA	NA	144	87		Negative	NA	NOT HISPANIC OR LATINO		NA	2011-09-13			C14.8	YES	NA	1970-03-01	C14.8	NO	0	2	NA		NO	NA	No	M0	Stage II	T2	N0	NX	NA	G1	Head & Neck Squamous Cell Carcinoma		NA	HNSC	ff9db03d-f81c-4079-8b05-f5a8c05b8cfe	9eb292e6-ae4d-4613-98ee-0197fd97b633
TCGA-CV-6939	Stage IVA		T4a		-21947	hnsc_tcga	Head and Neck Cancer	Head and Neck Squamous Cell Carcinoma	NA	NA	NA	NA	666	60		Negative	NA			NA	2011-09-13			C02.9	YES	NA	1970-03-01	C02.9	NO	0	1.9	12	Functional (Limited) Neck Dissection	YES	NA	No	M0	Stage IVA	T4a	N1	N2b	NA	G3	Head & Neck Squamous Cell Carcinoma		NA	HNSC	e7d1f0dd-eec0-4670-a2ba-00ffe38c6382	1ed822f5-fea5-46de-9681-ec484de734d8
TCGA-CV-6940	Stage III		T2		-29382	hnsc_tcga	Head and Neck Cancer	Head and Neck Squamous Cell Carcinoma	NA	NA	NA	NA	804	80		Negative	NA	NOT HISPANIC OR LATINO		NA	2011-09-13			C06.0	YES	NA	1970-03-01	C06.0	NO	0	0.6	12	Functional (Limited) Neck Dissection	YES	NA	No	M0	Stage I	T1	N0	N1	NA	G2	Head & Neck Squamous Cell Carcinoma		NA	HNSC	8b6e939c-c4b0-4d1e-a92c-ea998bc5d36a	585d8a0f-fa90-489c-b798-2593323436c9
TCGA-CV-6941	Stage III		T3	NO	-18812	hnsc_tcga	Head and Neck Cancer	Head and Neck Squamous Cell Carcinoma	NA	NA	NA	NA	342	51		Negative	NA	NOT HISPANIC OR LATINO	No Extranodal Extension	NA	2011-09-09			C02.9	YES	NA	1970-03-01	C02.9	NO	0	1.6	29	Modified Radical Neck Dissection	YES	NA	No	M0	Stage III	T3	N0	N0	NA	G2	Head & Neck Squamous Cell Carcinoma		NA	HNSC	ea93555b-daa5-439a-a13a-796917365454	3ebd4798-0bf8-45d2-aa65-2bf7f4344804
TCGA-CV-6942	Stage II		T2		-26941	hnsc_tcga	Head and Neck Cancer	Head and Neck Squamous Cell Carcinoma	NA	3835	NA	NA	NA	73		Negative	NA	HISPANIC OR LATINO	No Extranodal Extension	NA	2011-10-11			C14.8	YES	NA	1970-03-01	C14.8	NO	0	0.8	NA		NO	NA	No	M0	Stage II	T2	N0	NX	NA	G3	Head & Neck Squamous Cell Carcinoma		NA	HNSC	2bc1522c-b8c7-4f62-9338-d4b56a7ba6c6	faf2c979-3561-4aa3-92ad-86641cef920c
TCGA-CV-6943	Stage III		T3		-27310	hnsc_tcga	Head and Neck Cancer	Head and Neck Squamous Cell Carcinoma	5	NA	NA	NA	602	74		Negative	NA	NOT HISPANIC OR LATINO	No Extranodal Extension	NA	2011-09-09			C01	YES	NA	1970-03-01	C01.9	NO	0	1.3	NA		NO	NA	No	M0	Stage III	T3	N0	NX	7	G2	Head & Neck Squamous Cell Carcinoma		NA	HNSC	8b574abc-646b-4252-8eb7-b9c737d034d9	56c942d2-d77c-48c3-81ff-1c7bd64ac7cf
TCGA-CV-6945	Stage IVA		T4a		-15158	hnsc_tcga	Head and Neck Cancer	Head and Neck Squamous Cell Carcinoma	NA	NA	NA	NA	366	41		Negative	NA	NOT HISPANIC OR LATINO	Microscopic Extension	NA	2011-09-09			C02.9	YES	NA	1970-03-01	C02.9	NO	0	1.7	45	Radical Neck Dissection	YES	NA	No	M0	Stage IVA	T4a	N2b	N2	NA	G2	Head & Neck Squamous Cell Carcinoma		NA	HNSC	15714e69-e075-4688-8f51-c7102fe4ca07	55849997-67de-4fc6-b7bf-9d02d15920c9
TCGA-CV-6948	Stage IVB		T4a		-29153	hnsc_tcga	Head and Neck Cancer	Head and Neck Squamous Cell Carcinoma	NA	NA	NA	NA	1289	79		Negative	NA	NOT HISPANIC OR LATINO		NA	2011-08-25			C04.9	YES	NA	1970-03-01	C04.9	NO	0	0.5	44	Functional (Limited) Neck Dissection	YES	NA	No	M0	Stage IVA	T4a	N0	N3	NA	G2	Head & Neck Squamous Cell Carcinoma		NA	HNSC	fcf0dc48-b889-4593-a15b-aa715aae7bf5	21844f33-dd12-4940-b42d-2f9fabb2f7ba
TCGA-CV-6950	Stage IVA		T3	NO	-23549	hnsc_tcga	Head and Neck Cancer	Head and Neck Squamous Cell Carcinoma	5	NA	NA	NA	459	64		Negative	NA	NOT HISPANIC OR LATINO	Gross Extension	NA	2011-09-08			C01	YES	NA	1970-03-01	C01.9	NO	0	1	45	Functional (Limited) Neck Dissection	YES	NA	No	M0	Stage IVA	T3	N2c	N2c	7	G2	Head & Neck Squamous Cell Carcinoma		NA	HNSC	32128246-1258-43d1-b1e5-30ae63822c32	b8d13e48-6478-40a0-956c-0480a8f42715
TCGA-CV-6951	Stage IVA		T4a	NO	-21166	hnsc_tcga	Head and Neck Cancer	Head and Neck Squamous Cell Carcinoma	2	NA	NA	NA	915	57		Negative	NA	NOT HISPANIC OR LATINO	No Extranodal Extension	NA	2011-09-08			C02.9	YES	NA	1970-03-01	C02.9	NO	0	0.8	29	Functional (Limited) Neck Dissection	YES	NA	No	M0	Stage IVA	T4a	N2c	N2c	7	G2	Head & Neck Squamous Cell Carcinoma		NA	HNSC	91728cd6-ed91-49dc-9279-faedbe211a9d	9ee0f161-0976-4697-bf69-7e42e7149feb
TCGA-CV-6952	Stage IVA		T3	NO	-23892	hnsc_tcga	Head and Neck Cancer	Head and Neck Squamous Cell Carcinoma	3	NA	NA	NA	185	65		Negative	NA	NOT HISPANIC OR LATINO	No Extranodal Extension	NA	2011-09-12			C02.9	YES	NA	1970-03-01	C02.9	NO	0	0.6	9	Functional (Limited) Neck Dissection	YES	NA	No	M0	Stage III	T3	N0	N2b	7	G1	Head & Neck Squamous Cell Carcinoma		NA	HNSC	7ed006e8-461f-4664-bfff-55fa6812743c	18e70193-5d78-41dd-9fca-af5e54594ad3
TCGA-CV-6953	Stage III		T3	NO	-29465	hnsc_tcga	Head and Neck Cancer	Head and Neck Squamous Cell Carcinoma	NA	NA	NA	NA	1641	80		Negative	NA	NOT HISPANIC OR LATINO	No Extranodal Extension	NA	2011-09-08			C04.9	YES	NA	1970-03-01	C04.9	NO	0	1.1	33	Functional (Limited) Neck Dissection	YES	NA	No	M0	Stage III	T3	N0	N0	NA	G1	Head & Neck Squamous Cell Carcinoma		NA	HNSC	a4e90f64-d11a-4278-a79e-d64c936e8e86	68f0a771-7870-434f-bd7e-187cab134a47
TCGA-CV-6954	Stage IVA		T4a	NO	-21557	hnsc_tcga	Head and Neck Cancer	Head and Neck Squamous Cell Carcinoma	3	NA	NA	NA	2002	59		Negative	NA		No Extranodal Extension	NA	2011-09-08			C02.9	YES	NA	1970-03-01	C02.9	NO	0	1.3	22	Functional (Limited) Neck Dissection	YES	NA	No	M0	Stage IVA	T4a	N1	NX	7	G2	Head & Neck Squamous Cell Carcinoma		NA	HNSC	402fd96c-76d3-4ac2-9f64-77bd34be0adb	f72d39ea-7db5-47c6-9428-3e26454c9a9a
TCGA-CV-6955	Stage II		T2		-27261	hnsc_tcga	Head and Neck Cancer	Head and Neck Squamous Cell Carcinoma	NA	NA	NA	NA	334	74			NA	NOT HISPANIC OR LATINO	No Extranodal Extension	NA	2011-10-11			C14.8	YES	NA	1970-03-01	C14.8	NO	0	0.6	NA		NO	NA	No	M0	Stage II	T2	N0	NX	NA	G3	Head & Neck Squamous Cell Carcinoma		NA	HNSC	f3ee1127-ed53-43e8-825e-1e5516371054	562ac004-4b9d-4cb2-a52b-88a64b49b1a4
TCGA-CV-6956	Stage III		T3	YES	-24720	hnsc_tcga	Head and Neck Cancer	Head and Neck Squamous Cell Carcinoma	NA	NA	NA	NA	217	67		Negative	NA	HISPANIC OR LATINO	No Extranodal Extension	NA	2011-10-11			C02.9	YES	NA	1970-03-01	C02.9	NO	0	1.3	27	Functional (Limited) Neck Dissection	YES	NA	No	M0	Stage IVA	T4a	N2c	N1	NA	G2	Head & Neck Squamous Cell Carcinoma		NA	HNSC	8c238d30-df8e-4e6b-98fc-21696269a294	8b9f33fa-04ef-4767-93d1-98f6e420d037
TCGA-CV-6959	Stage III		T3	NO	-17679	hnsc_tcga	Head and Neck Cancer	Head and Neck Squamous Cell Carcinoma	1	NA	NA	NA	256	48		Negative	NA	NOT HISPANIC OR LATINO	No Extranodal Extension	NA	2011-09-08			C02.9	YES	NA	1970-03-01	C02.9	NO	0	1.1	28	Functional (Limited) Neck Dissection	YES	NA	No	M0	Stage III	T3	N1	N0	7	G2	Head & Neck Squamous Cell Carcinoma		NA	HNSC	ef3ce0e5-d2e8-4616-8b1a-a78c591cf235	07fb167a-3f61-4517-a79e-ba2042f10a3a
TCGA-CV-6960	Stage III		T3	NO	-18194	hnsc_tcga	Head and Neck Cancer	Head and Neck Squamous Cell Carcinoma	2	NA	NA	NA	862	49		Negative	NA		No Extranodal Extension	NA	2011-09-08			C14.8	YES	NA	1970-03-01	C14.8	NO	0	1	22	Functional (Limited) Neck Dissection	YES	NA	No	M0	Stage III	T3	N0	N0	7	G3	Head & Neck Squamous Cell Carcinoma		NA	HNSC	2c985b30-0f8f-4c8f-a924-cc6aad7ebf0d	967f6cc9-95d2-4666-a20a-717d768613a4
TCGA-CV-6961	Stage II		T2		-22532	hnsc_tcga	Head and Neck Cancer	Head and Neck Squamous Cell Carcinoma	2	NA	NA	NA	76	61		Negative	NA	NOT HISPANIC OR LATINO	No Extranodal Extension	NA	2011-09-12			C02.9	YES	NA	1970-03-01	C02.9	NO	0	1.6	NA		NO	NA	No	M0	Stage II	T2	N0	N0	7	G3	Head & Neck Squamous Cell Carcinoma		NA	HNSC	4075717b-2240-4842-a00a-0c4dbcb910c4	be0a6a2b-a306-4ac6-8bf8-ea6af16eaa5a
TCGA-CV-6962	Stage IVA		T4a		-24103	hnsc_tcga	Head and Neck Cancer	Head and Neck Squamous Cell Carcinoma	NA	NA	NA	NA	126	65		Positive	NA	HISPANIC OR LATINO		NA	2011-08-25			C32.9	YES	NA	1970-03-01	C32.9	NO	0	0.9	NA		NO	NA	No	M0	Stage III	T3	N0	NX	NA	G2	Head & Neck Squamous Cell Carcinoma		NA	HNSC	9bcf4ed8-bfb4-49aa-a37e-d91325926894	366f8ab0-ddd8-4383-9bc1-96ef342b749c
TCGA-CV-7089	Stage IVA		T4a	YES	-27149	hnsc_tcga	Head and Neck Cancer	Head and Neck Squamous Cell Carcinoma	0	NA	NA	NA	1972	74		Negative	NA	NOT HISPANIC OR LATINO	No Extranodal Extension	NA	2011-10-11			C32.9	YES	NA	1970-03-01	C32.9	NO	0	0.7	22	Modified Radical Neck Dissection	YES	NA	No	M0	Stage IVA	T4a	N2	N2c	0	G2	Head & Neck Squamous Cell Carcinoma		NA	HNSC	490950f3-2d1a-4174-a30d-b8f5654ff316	f2e436bd-bbc1-4b1d-9a55-e2a83a1bb510
TCGA-CV-7090	Stage II		T2		-14515	hnsc_tcga	Head and Neck Cancer	Head and Neck Squamous Cell Carcinoma	NA	3837	NA	NA	NA	39		Negative	NA	NOT HISPANIC OR LATINO	No Extranodal Extension	NA	2011-10-11			C14.8	YES	NA	1970-03-01	C14.8	NO	0	1.5	NA		NO	NA	No	M0	Stage II	T2	N0	NX	NA	G2	Head & Neck Squamous Cell Carcinoma		NA	HNSC	05fbd98c-28bd-41bc-ae60-16ac0c16c723	e8bd9dcb-a9c7-4361-9724-24922a5e613b
TCGA-CV-7091	Stage I		T1	YES	-19938	hnsc_tcga	Head and Neck Cancer	Head and Neck Squamous Cell Carcinoma	3	3381	NA	NA	NA	54		Negative	NA	NOT HISPANIC OR LATINO	No Extranodal Extension	NA	2011-10-11			C14.8	YES	NA	1970-03-01	C14.8	NO	0	0.6	25	Functional (Limited) Neck Dissection	YES	NA	No	M0	Stage I	T1	N0	N0	7	G3	Head & Neck Squamous Cell Carcinoma		NA	HNSC	2a192049-6435-49ab-8444-ddeb2b9ee774	3ab78dc4-682e-4b5a-adda-223acf0fbb6a
TCGA-CV-7095	Stage II		T2	NO	-32022	hnsc_tcga	Head and Neck Cancer	Head and Neck Squamous Cell Carcinoma	NA	NA	NA	NA	572	87		Negative	NA	HISPANIC OR LATINO	No Extranodal Extension	NA	2011-10-05			C14.8	YES	NA	1970-03-01	C14.8	NO	0	1.9	8		YES	NA	No	M0	Stage IVA	T1	N2a	NX	NA	G2	Head & Neck Squamous Cell Carcinoma		NA	HNSC	d7d49895-032f-4385-8b68-ae16f8675ca7	e7d35c82-8992-4cc0-aa65-df5cab5727eb
TCGA-CV-7097	Stage II		T2	NO	-19382	hnsc_tcga	Head and Neck Cancer	Head and Neck Squamous Cell Carcinoma	3	NA	NA	NA	385	53		Close	NA	NOT HISPANIC OR LATINO	No Extranodal Extension	NA	2011-10-05			C14.8	YES	NA	1970-03-01	C14.8	NO	0	2	NA		NO	NA	No	M0	Stage III	T3	N0	NX	7	G3	Head & Neck Squamous Cell Carcinoma		NA	HNSC	9d0f5938-6a01-4c06-8536-dff834f7f2f9	09d5f5c9-6895-4f78-9929-b7522b461c06
TCGA-CV-7099	Stage II		T2	NO	-31134	hnsc_tcga	Head and Neck Cancer	Head and Neck Squamous Cell Carcinoma	NA	NA	NA	NA	243	85		Negative	NA		No Extranodal Extension	NA	2011-10-06			C14.8	YES	NA	1970-03-01	C14.8	NO	0	0.7	NA		NO	NA	No	M0	Stage II	T2	N0	NX	NA	G2	Head & Neck Squamous Cell Carcinoma		NA	HNSC	57212fda-fd32-4328-81dc-61f167970f89	9ad21e89-af1e-4ddd-8659-e0aa10a16830
TCGA-CV-7100	Stage III		T2	NO	-24183	hnsc_tcga	Head and Neck Cancer	Head and Neck Squamous Cell Carcinoma	NA	NA	NA	NA	274	66		Positive	NA		No Extranodal Extension	NA	2011-10-06			C14.8	YES	NA	1970-03-01	C14.8	NO	0	1.5	NA		NO	NA	No	M0	Stage II	T2	N0	N1	NA	G3	Head & Neck Squamous Cell Carcinoma		NA	HNSC	90a8d2cb-1f31-45f9-8575-eed3cb9a7798	08c3093d-4100-4bfc-92fc-a11f1393868f
TCGA-CV-7101	Stage II		T2	NO	-29550	hnsc_tcga	Head and Neck Cancer	Head and Neck Squamous Cell Carcinoma	3	NA	NA	NA	160	80		Negative	NA	NOT HISPANIC OR LATINO	No Extranodal Extension	NA	2011-10-06			C32.9	YES	NA	1970-03-01	C32.9	NO	0	0.7	0		NO	NA	No	M0	Stage II	T2	N0	NX	7	G2	Head & Neck Squamous Cell Carcinoma		NA	HNSC	241d9310-9137-42dd-b28d-0dc50c44cb43	397b08f6-f560-418b-a6e6-2d953187bd5d
TCGA-CV-7102	Stage IVA		T3	YES	-27805	hnsc_tcga	Head and Neck Cancer	Head and Neck Squamous Cell Carcinoma	1	NA	NA	NA	56	76		Negative	NA	NOT HISPANIC OR LATINO		NA	2011-10-06			C04.9	YES	NA	1970-03-01	C04.9	NO	0	0.6	24	Modified Radical Neck Dissection	YES	NA	No	M0	Stage III	T3	N1	N2	7	G3	Head & Neck Squamous Cell Carcinoma		NA	HNSC	5a976335-2326-46f0-abf1-29b744da1f43	6d692691-7429-4b8e-a1b1-0ba0d31fd0b5
TCGA-CV-7103	Stage IVA		T2		-18219	hnsc_tcga	Head and Neck Cancer	Head and Neck Squamous Cell Carcinoma	3	NA	NA	NA	1591	49		Negative	NA	NOT HISPANIC OR LATINO	No Extranodal Extension	NA	2011-10-11			C02.9	YES	NA	1970-03-01	C02.9	NO	0	1.5	14	Functional (Limited) Neck Dissection	YES	NA	No	M0	Stage II	T2	N0	N2b	7	G2	Head & Neck Squamous Cell Carcinoma		NA	HNSC	1dd23cd6-3aa8-4553-8813-04701451846e	1c43c2f9-958e-445a-858d-72606590271f
TCGA-CV-7104	Stage IVA		T2	YES	-22349	hnsc_tcga	Head and Neck Cancer	Head and Neck Squamous Cell Carcinoma	NA	NA	NA	NA	393	61		Negative	NA	NOT HISPANIC OR LATINO	No Extranodal Extension	NA	2011-10-11			C02.9	YES	NA	1971-03-01	C02.9	NO	0	1.4	30	Modified Radical Neck Dissection	YES	NA	No	M0	Stage IVA	T2	N2	N2b	NA	G2	Head & Neck Squamous Cell Carcinoma		NA	HNSC	aa34f900-b2e4-4276-9d28-807ad11444ac	ed0e4a28-dd03-4346-9d77-73cf24f7b4b0
TCGA-CV-7177	Stage II		T2		-30180	hnsc_tcga	Head and Neck Cancer	Head and Neck Squamous Cell Carcinoma	NA	NA	NA	NA	663	82		Negative	NA	NOT HISPANIC OR LATINO	No Extranodal Extension	NA	2011-10-11			C32.9	YES	NA	1970-03-01	C32.9	NO	0	1.2	NA		NO	NA	No	M0	Stage I	T1	N0	NX	NA	G2	Head & Neck Squamous Cell Carcinoma		NA	HNSC	c539274c-e2bf-4b5f-ab56-35eff1569bac	768e2bab-347b-4d90-887f-bf5692a91eb0
TCGA-CV-7178	Stage IVA		T4a		-23430	hnsc_tcga	Head and Neck Cancer	Head and Neck Squamous Cell Carcinoma	0	NA	NA	NA	2166	64		Close	NA	NOT HISPANIC OR LATINO	No Extranodal Extension	NA	2011-10-11			C14.8	YES	NA	1970-03-01	C14.8	NO	0	0.8	21		YES	NA	No	M0	Stage IVA	T4a	N1	N2	2	G3	Head & Neck Squamous Cell Carcinoma		NA	HNSC	8f044599-3fbe-4b69-b67d-49aee9168545	caab8e84-3225-4543-949e-7b7eb11244a2
TCGA-CV-7180	Stage II		T2		-12523	hnsc_tcga	Head and Neck Cancer	Head and Neck Squamous Cell Carcinoma	6	NA	NA	NA	327	34		Negative	NA	NOT HISPANIC OR LATINO	No Extranodal Extension	NA	2011-10-11			C02.9	YES	NA	1970-03-01	C02.9	NO	0	1.2	17	Modified Radical Neck Dissection	YES	NA	No	M0	Stage II	T2	N0	NX	2	G2	Head & Neck Squamous Cell Carcinoma		NA	HNSC	d2ca9a4d-c14c-40c0-871c-88794a02e4aa	551b5ac7-41e8-42bc-b64d-20e7e156dbbc
TCGA-CV-7183	Stage II		T2		-19358	hnsc_tcga	Head and Neck Cancer	Head and Neck Squamous Cell Carcinoma	NA	3497	NA	NA	NA	53		Negative	NA	NOT HISPANIC OR LATINO	No Extranodal Extension	NA	2011-10-11			C14.8	YES	NA	1970-03-01	C14.8	NO	0	1	36	Modified Radical Neck Dissection	YES	NA	No	M0	Stage II	T2	N0	N0	NA	G1	Head & Neck Squamous Cell Carcinoma		NA	HNSC	de206681-3e27-4d4f-8669-aefb12b5b1e3	0bfd11fd-b227-41ef-bd54-7be877bce5a2
TCGA-CV-7235	Stage II		T2	YES	-24800	hnsc_tcga	Head and Neck Cancer	Head and Neck Squamous Cell Carcinoma	4	1724	NA	NA	NA	67		Positive	NA	NOT HISPANIC OR LATINO		NA	2011-12-12			C04.9	YES	NA	1970-03-01	C04.9	NO	0	1.6	64	Functional (Limited) Neck Dissection	YES	NA	No	M0	Stage III	T3	N0	N0	7	G3	Head & Neck Squamous Cell Carcinoma		NA	HNSC	2fbafcc5-896c-4e50-8956-a61540fc89be	364e1a5d-c8b1-4bf1-a166-d9b064210937
TCGA-CV-7236	Stage IVA		T3	YES	-28250	hnsc_tcga	Head and Neck Cancer	Head and Neck Squamous Cell Carcinoma	NA	NA	NA	NA	144	77		Negative	NA	NOT HISPANIC OR LATINO	No Extranodal Extension	NA	2011-12-02			C02.9	YES	NA	1970-03-01	C02.9	NO	0	1.1	34	Functional (Limited) Neck Dissection	YES	NA	No	M0	Stage IVA	T2	N2c	N2c	NA	G3	Head & Neck Squamous Cell Carcinoma		NA	HNSC	38cfe5af-02e4-4271-8978-8e2566d3dca7	ab659276-f3f1-43ee-aa4e-404c9b4e98bd
TCGA-CV-7238	Stage II		T2	NO	-25471	hnsc_tcga	Head and Neck Cancer	Head and Neck Squamous Cell Carcinoma	NA	1444	NA	NA	NA	69		Negative	NA	NOT HISPANIC OR LATINO		NA	2011-12-05			C02.9	YES	NA	1970-03-01	C02.9	NO	0	1	73	Functional (Limited) Neck Dissection	YES	NA	No	M0	Stage II	T2	N0	N0	NA	G2	Head & Neck Squamous Cell Carcinoma		NA	HNSC	78fcc813-d0a8-44aa-b004-62810dca9d12	831808d5-1883-4f6f-b252-1bb397fbd62a
TCGA-CV-7242	Stage II		T2	NO	-22136	hnsc_tcga	Head and Neck Cancer	Head and Neck Squamous Cell Carcinoma	5	1095	NA	NA	NA	60		Negative	NA	NOT HISPANIC OR LATINO		NA	2011-12-02			C32.9	YES	NA	1970-03-01	C32.9	NO	0	1	43	Functional (Limited) Neck Dissection	YES	NA	No	M0	Stage III	T3	N0	N0	7	G2	Head & Neck Squamous Cell Carcinoma		NA	HNSC	4b4247e2-4446-44f5-8573-4cea8bf69f8e	4fdddf85-30de-4666-89d2-0683e9264d6d
TCGA-CV-7245	Stage IVA		T4a	NO	-22646	hnsc_tcga	Head and Neck Cancer	Head and Neck Squamous Cell Carcinoma	NA	797	NA	NA	NA	62		Negative	NA	HISPANIC OR LATINO		NA	2011-12-02			C32.9	YES	NA	1970-03-01	C32.9	NO	0	1.3	46	Functional (Limited) Neck Dissection	YES	NA	No	M0	Stage III	T3	N0	N0	NA	G2	Head & Neck Squamous Cell Carcinoma		NA	HNSC	ae2051a3-f851-4cb3-af18-029f4574b179	f0684e03-2d91-4e9b-9d11-a3063ccc2f34
TCGA-CV-7247	Stage III		T3	YES	-20433	hnsc_tcga	Head and Neck Cancer	Head and Neck Squamous Cell Carcinoma	NA	NA	NA	NA	577	55		Negative	NA	NOT HISPANIC OR LATINO		NA	2011-12-05			C32.9	YES	NA	1970-03-01	C32.9	NO	0	1.5	9	Functional (Limited) Neck Dissection	YES	NA	No	M0	Stage II	T2	N0	N0	NA	G2	Head & Neck Squamous Cell Carcinoma		NA	HNSC	5e25ab76-a8ab-4779-aa03-8de658f18da1	f84ae44b-4bb7-4841-aee0-139cd79b9680
TCGA-CV-7248	Stage IVA		T4a	YES	-23082	hnsc_tcga	Head and Neck Cancer	Head and Neck Squamous Cell Carcinoma	NA	NA	NA	NA	521	63		Negative	NA	NOT HISPANIC OR LATINO	Microscopic Extension	NA	2011-12-02			C32.9	YES	NA	1970-03-01	C32.9	NO	0	0.8	24	Modified Radical Neck Dissection	YES	NA	No	M0	Stage IVA	T4a	N2b	N2c	NA	G2	Head & Neck Squamous Cell Carcinoma		NA	HNSC	34227de4-d23c-46d6-b78b-49add24a4b88	24a2dd45-0453-4bfa-af4c-cde8cb0c0cfb
TCGA-CV-7250	Stage IVA		T4a	NO	-23489	hnsc_tcga	Head and Neck Cancer	Head and Neck Squamous Cell Carcinoma	NA	NA	NA	NA	2900	64		Negative	NA	NOT HISPANIC OR LATINO		NA	2011-12-05			C32.9	YES	NA	1970-03-01	C32.9	NO	0	1.6	48	Modified Radical Neck Dissection	YES	NA	No	M0	Stage III	T3	N0	N0	NA	G1	Head & Neck Squamous Cell Carcinoma		NA	HNSC	0858c8b7-e2eb-4461-b65e-9d476029ad8d	6f55766a-d980-414a-be4a-369e93ec3436
TCGA-CV-7252	Stage IVA		T4a	NO	-22934	hnsc_tcga	Head and Neck Cancer	Head and Neck Squamous Cell Carcinoma	NA	NA	NA	NA	151	62		Positive	NA	NOT HISPANIC OR LATINO		NA	2011-12-02			C14.8	YES	NA	1970-03-01	C14.8	NO	0	1.1	34	Modified Radical Neck Dissection	YES	NA	No	M0	Stage III	T3	N0	N0	NA	G2	Head & Neck Squamous Cell Carcinoma		NA	HNSC	24ecbe19-a9ea-4215-a7f1-74300f9ed2a9	ca12da0c-35da-44fe-9cdf-54234c2364ca
TCGA-CV-7253	Stage IVA		T4a	NO	-21473	hnsc_tcga	Head and Neck Cancer	Head and Neck Squamous Cell Carcinoma	NA	NA	NA	NA	361	58		Positive	NA	NOT HISPANIC OR LATINO		NA	2011-12-05			C14.8	YES	NA	1970-03-01	C14.8	NO	0	1.8	NA		NO	NA	No	M0	Stage II	T2	N0	N0	NA	G2	Head & Neck Squamous Cell Carcinoma		NA	HNSC	d99f39f3-e85a-4073-b6ce-371ba76cea20	e6ba033b-7771-455a-a2be-e2b7a1fe948d
TCGA-CV-7254	Stage II		T2	YES	-20306	hnsc_tcga	Head and Neck Cancer	Head and Neck Squamous Cell Carcinoma	6	NA	NA	NA	1459	55		Positive	NA	NOT HISPANIC OR LATINO		NA	2011-12-02			C14.8	YES	NA	1970-03-01	C14.8	NO	0	1.6	0		NO	NA	No	M0	Stage II	T2	N0	NX	7	G3	Head & Neck Squamous Cell Carcinoma		NA	HNSC	f4343626-f677-4fe5-862b-8fb4a16262bf	f6428823-2ef6-498f-88d3-d60d5f2d2347
TCGA-CV-7255	Stage IVA		T4a	NO	-11931	hnsc_tcga	Head and Neck Cancer	Head and Neck Squamous Cell Carcinoma	NA	NA	NA	NA	64	32		Negative	NA	NOT HISPANIC OR LATINO		NA	2011-12-05			C02.9	YES	NA	1970-03-01	C02.9	NO	0	1.1	NA		NO	NA	No	M0	Stage II	T2	N0	N0	NA	G2	Head & Neck Squamous Cell Carcinoma		NA	HNSC	534f85f2-b9eb-45be-87d5-c3dffd13d541	45a42060-1f1c-45ff-9717-9be2f7fdf3f7
TCGA-CV-7261	Stage IVA		T4a	NO	-20992	hnsc_tcga	Head and Neck Cancer	Head and Neck Squamous Cell Carcinoma	NA	1099	NA	NA	NA	57		Negative	NA	NOT HISPANIC OR LATINO		NA	2011-12-02			C32.9	YES	NA	1970-03-01	C32.9	NO	0	1.3	17	Functional (Limited) Neck Dissection	YES	NA	No	M0	Stage III	T3	N0	N0	NA	G2	Head & Neck Squamous Cell Carcinoma		NA	HNSC	55f96a9c-e2c8-4243-8a7e-94bc6fab73a6	b069c55b-496a-4a57-a507-1b2e1b4201ae
TCGA-CV-7263	Stage II		T2	NO	-23513	hnsc_tcga	Head and Neck Cancer	Head and Neck Squamous Cell Carcinoma	NA	NA	NA	NA	560	64		Positive	NA			NA	2011-12-05			C14.8	YES	NA	1970-03-01	C14.8	NO	0	1	NA			NA	No	M0	Stage II	T2	NX	NX	NA	G1	Head & Neck Squamous Cell Carcinoma		NA	HNSC	93b742eb-5fc3-4ce2-b7f6-c89f97e0dcc9	54dcb9ac-fd35-49c2-a790-b1f016160183
TCGA-CV-7407	Stage II		T2		-24475	hnsc_tcga	Head and Neck Cancer	Head and Neck Squamous Cell Carcinoma	NA	NA	NA	NA	1081	67		Negative	NA	NOT HISPANIC OR LATINO	No Extranodal Extension	NA	2012-02-10			C04.9	YES	NA	1970-03-01	C04.9	NO	0	1.5	NA		NO	NA	No	M0	Stage II	T2	N0	NX	NA	G2	Head & Neck Squamous Cell Carcinoma		NA	HNSC	8b63be59-9ce6-45a0-80d9-4d20f4918cb9	6abaf81a-b228-4afe-b931-bc1fc39cd265
TCGA-CV-7411	Stage IVA		T4a		-23696	hnsc_tcga	Head and Neck Cancer	Head and Neck Squamous Cell Carcinoma	NA	NA	NA	NA	2717	64		Negative	NA	NOT HISPANIC OR LATINO		NA	2012-02-13			C14.8	YES	NA	1970-03-01	C14.8	NO	0	1.4	29	Functional (Limited) Neck Dissection	YES	NA	No	M0	Stage IVA	T4a	N0	N0	NA	G1	Head & Neck Squamous Cell Carcinoma		NA	HNSC	600fc87b-a177-4bf9-9084-457f7e7e102c	24876e1a-e07e-4f74-86bf-3395a88ce4a1
TCGA-CV-7413	Stage II		T2	NO	-27231	hnsc_tcga	Head and Neck Cancer	Head and Neck Squamous Cell Carcinoma	NA	NA	NA	NA	294	74		Negative	NA	NOT HISPANIC OR LATINO	No Extranodal Extension	NA	2012-02-17			C14.8	YES	NA	1970-03-01	C14.8	NO	0	1.3	NA		NO	NA	No	M0	Stage II	T2	N0	N0	NA	G2	Head & Neck Squamous Cell Carcinoma		NA	HNSC	b3342767-62bc-407f-8a83-5be50e3bdc3e	5baeefd5-05f7-431b-b2e0-8d3ebdc1ee92
TCGA-CV-7414	Stage IVA		T4a	YES	-28603	hnsc_tcga	Head and Neck Cancer	Head and Neck Squamous Cell Carcinoma	NA	NA	NA	NA	14	78		Negative	NA	NOT HISPANIC OR LATINO	Microscopic Extension	NA	2012-02-13			C14.8	YES	NA	1970-03-01	C14.8	NO	0	2	21	Radical Neck Dissection	YES	NA	No	M0	Stage III	T3	N1	N2b	NA	G2	Head & Neck Squamous Cell Carcinoma		NA	HNSC	c3b2c38d-81a3-42fd-a41e-6f6de3934007	7be274d5-d5a0-4ef9-a65a-4127ed864f0c
TCGA-CV-7415	Stage IVA		T4a	YES	-22062	hnsc_tcga	Head and Neck Cancer	Head and Neck Squamous Cell Carcinoma	NA	NA	NA	NA	695	60		Negative	NA	NOT HISPANIC OR LATINO	Microscopic Extension	NA	2012-02-10			C32.9	YES	NA	1970-03-01	C32.9	NO	0	1	82	Radical Neck Dissection	YES	NA	No	M0	Stage III	T3	N0	N2c	NA	G2	Head & Neck Squamous Cell Carcinoma		NA	HNSC	f22eac21-8a74-433a-b65c-3540d14a45cb	72f5520a-28f0-4be6-afe0-6bee4de5b69a
TCGA-CV-7418	Stage IVA		T4a		-22805	hnsc_tcga	Head and Neck Cancer	Head and Neck Squamous Cell Carcinoma	6	NA	NA	NA	789	62		Positive	NA	NOT HISPANIC OR LATINO		NA	2012-02-10			C32.9	YES	NA	1970-03-01	C32.9	NO	0	0.8	28	Functional (Limited) Neck Dissection	YES	NA	No	M0	Stage IVA	T4a	N0	N2b	7	G2	Head & Neck Squamous Cell Carcinoma		NA	HNSC	20ad4ac0-6a87-461f-83a5-fded51bf821a	2e5b2590-4227-4265-a837-8175920e4d01
TCGA-CV-7421	Stage IVA		T4a		-27961	hnsc_tcga	Head and Neck Cancer	Head and Neck Squamous Cell Carcinoma	NA	NA	NA	NA	2	76		Negative	NA	NOT HISPANIC OR LATINO	No Extranodal Extension	NA	2012-02-13			C32.9	YES	NA	1970-03-01	C32.9	NO	0	0.9	11	Functional (Limited) Neck Dissection	YES	NA	No	M0	Stage IVA	T4a	N0	N0	NA	G2	Head & Neck Squamous Cell Carcinoma		NA	HNSC	e0acb3aa-4cb4-43c9-ae36-2213536666a6	6766e43d-12fd-49ba-bdde-c19bb71d329d
TCGA-CV-7422	Stage IVA		T4a	YES	-22098	hnsc_tcga	Head and Neck Cancer	Head and Neck Squamous Cell Carcinoma	NA	NA	NA	NA	1037	60		Negative	NA	NOT HISPANIC OR LATINO	Microscopic Extension	NA	2012-02-10			C32.9	YES	NA	1970-03-01	C32.9	NO	0	1.5	27	Functional (Limited) Neck Dissection	YES	NA	No	M0	Stage IVA	T4a	N1	N1	NA	G3	Head & Neck Squamous Cell Carcinoma		NA	HNSC	2e73e016-61ff-4f23-9ca9-fd48d9050d82	63bdeeca-a7b1-47fb-9945-c24f7513c56c
TCGA-CV-7423	Stage II		T2		-24071	hnsc_tcga	Head and Neck Cancer	Head and Neck Squamous Cell Carcinoma	NA	NA	NA	NA	3059	65		Negative	NA	NOT HISPANIC OR LATINO		NA	2012-02-13			C14.8	YES	NA	1970-03-01	C14.8	NO	0	1.2	NA		NO	NA	No	M0	Stage II	T2	N0	NX	NA	G1	Head & Neck Squamous Cell Carcinoma		NA	HNSC	f3a626e4-2d93-4d13-a34c-de0e0c6118ac	ed42e6f5-9894-49f5-a2a9-e12a9f342ce5
TCGA-CV-7424	Stage IVA		T3		-24775	hnsc_tcga	Head and Neck Cancer	Head and Neck Squamous Cell Carcinoma	NA	NA	NA	NA	453	67		Close	NA	NOT HISPANIC OR LATINO	Gross Extension	NA	2012-02-07			C32.9	YES	NA	1970-03-01	C32.9	NO	0	1.5	4	Modified Radical Neck Dissection	YES	NA	No	M0	Stage IVA	T4a	N2a	N2b	NA	G2	Head & Neck Squamous Cell Carcinoma		NA	HNSC	815119e3-13c4-4f63-98c7-10a519034a25	7dafe515-fefb-4656-ab96-b72e09e041f7
TCGA-CV-7425	Stage III		T3		-28368	hnsc_tcga	Head and Neck Cancer	Head and Neck Squamous Cell Carcinoma	NA	NA	NA	NA	1718	77		Positive	NA	NOT HISPANIC OR LATINO		NA	2012-02-13			C14.8	YES	NA	1970-03-01	C14.8	NO	0	1.5	NA		NO	NA	No	M0	Stage III	T3	N0	NX	NA	G1	Head & Neck Squamous Cell Carcinoma		NA	HNSC	d2e43b2d-2b28-441a-8f03-a43ae7dfc1ce	7bdb4e29-be48-4e55-a018-4ecc9053c767
TCGA-CV-7427	Stage II		T2		-26975	hnsc_tcga	Head and Neck Cancer	Head and Neck Squamous Cell Carcinoma	1	NA	NA	NA	4760	73		Negative	NA	NOT HISPANIC OR LATINO		NA	2012-02-13			C14.8	YES	NA	1970-03-01	C14.8	NO	0	1	NA		NO	NA	No	M0	Stage II	T2	N0	NX	7	G1	Head & Neck Squamous Cell Carcinoma		NA	HNSC	c2bbb6f9-6f88-4a58-a15a-b887dfad34b4	75df5118-f915-44a9-aa7e-ce9cac1b5d9e
TCGA-CV-7428	Stage IVA		T4a		-17429	hnsc_tcga	Head and Neck Cancer	Head and Neck Squamous Cell Carcinoma	3	NA	NA	NA	1671	47		Positive	NA	NOT HISPANIC OR LATINO		NA	2012-02-13			C14.8	YES	NA	1970-03-01	C14.8	NO	0	1.3	10	Functional (Limited) Neck Dissection	YES	NA	No	M0	Stage IVA	T4a	N2a	N2b	7	G2	Head & Neck Squamous Cell Carcinoma		NA	HNSC	90d3c240-5cb6-4601-a852-b5cdfbcd6483	f3cfc60b-ada9-4549-8cdb-6cebabb1e6b3
TCGA-CV-7429	Stage IVA		T4a		-20188	hnsc_tcga	Head and Neck Cancer	Head and Neck Squamous Cell Carcinoma	NA	NA	NA	NA	107	55		Negative	NA	NOT HISPANIC OR LATINO	Microscopic Extension	NA	2012-02-13			C14.8	YES	NA	1970-03-01	C14.8	NO	0	1.2	24	Functional (Limited) Neck Dissection	YES	NA	No	M0	Stage III	T3	N0	N2b	NA	G3	Head & Neck Squamous Cell Carcinoma		NA	HNSC	44d99f11-ef5b-45d7-b7df-b5c5893d878f	a8a03639-fad0-4b1b-9802-e3882bbfc7b8
TCGA-CV-7430	Stage IVA		T4a	YES	-20763	hnsc_tcga	Head and Neck Cancer	Head and Neck Squamous Cell Carcinoma	NA	NA	NA	NA	495	56		Positive	NA	NOT HISPANIC OR LATINO		NA	2012-02-13			C32.9	YES	NA	1970-03-01	C32.9	NO	0	2	10	Functional (Limited) Neck Dissection	YES	NA	No	M0	Stage III	T3	N0	N0	NA	G2	Head & Neck Squamous Cell Carcinoma		NA	HNSC	df132eb8-174b-4427-a16b-953e0f28bf2f	0e0af838-3a62-44a6-9e8e-0f9ba07730fa
TCGA-CV-7432	Stage II		T2		-28875	hnsc_tcga	Head and Neck Cancer	Head and Neck Squamous Cell Carcinoma	NA	NA	NA	NA	2570	79		Negative	NA	NOT HISPANIC OR LATINO		NA	2012-02-13			C14.8	YES	NA	1970-03-01	C14.8	NO	0	1	20	Functional (Limited) Neck Dissection	YES	NA	No	M0	Stage III	T2	N1	N0	NA	G1	Head & Neck Squamous Cell Carcinoma		NA	HNSC	eaf674dd-9909-4879-b9a3-74253169eddd	9213ab13-afc6-40b9-b278-98dd05c92934
TCGA-CV-7433	Stage IVA		T4a		-18004	hnsc_tcga	Head and Neck Cancer	Head and Neck Squamous Cell Carcinoma	NA	NA	NA	NA	601	49		Negative	NA	NOT HISPANIC OR LATINO	Microscopic Extension	NA	2012-02-13			C32.9	YES	NA	1970-03-01	C32.9	NO	0	1.5	43	Functional (Limited) Neck Dissection	YES	NA	No	M0	Stage IVA	T4a	N1	N2b	NA	G3	Head & Neck Squamous Cell Carcinoma		NA	HNSC	c9c33b2a-bf99-4563-a220-01a5dbe3be92	5c4960e6-92f7-4576-a7d8-82a7c3d7cd5f
TCGA-CV-7434	Stage IVA		T4a		-23465	hnsc_tcga	Head and Neck Cancer	Head and Neck Squamous Cell Carcinoma	1	NA	NA	NA	218	64		Negative	NA	NOT HISPANIC OR LATINO	Microscopic Extension	NA	2012-02-13			C14.8	YES	NA	1970-03-01	C14.8	NO	0	0.8	1	Functional (Limited) Neck Dissection	YES	NA	No	M0	Stage III	T3	N0	N1	7	G2	Head & Neck Squamous Cell Carcinoma		NA	HNSC	63b50e1c-7948-464f-bff1-8e0e5daafcc5	2cb75c6e-ca4f-4a88-9679-812a51c7b832
TCGA-CV-7435	Stage IVA		T3	YES	-21049	hnsc_tcga	Head and Neck Cancer	Head and Neck Squamous Cell Carcinoma	NA	4335	NA	NA	NA	57		Negative	NA	NOT HISPANIC OR LATINO	No Extranodal Extension	NA	2012-02-13			C14.8	YES	NA	1970-03-01	C14.8	NO	0	1.8	22	Functional (Limited) Neck Dissection	YES	NA	No	M0	Stage IVA	T4a	N1	N2b	NA	G2	Head & Neck Squamous Cell Carcinoma		NA	HNSC	65ba24fb-07df-47ce-91c4-677684b64cf4	8e843a09-ba96-4089-b6f2-43d751f01203
TCGA-CV-7438	Stage I		T1	YES	-32021	hnsc_tcga	Head and Neck Cancer	Head and Neck Squamous Cell Carcinoma	NA	NA	NA	NA	194	87		Close	NA	NOT HISPANIC OR LATINO		NA	2012-02-13			C02.9	YES	NA	1970-03-01	C02.9	NO	0	1.3	NA		NO	NA	No	M0	Stage II	T2	N0	NX	NA	G3	Head & Neck Squamous Cell Carcinoma		NA	HNSC	08a45833-16a3-4a57-a310-307ec086e558	f05f3edc-4113-4774-a9ed-3914c0864c97
TCGA-CV-7446	Stage IVA		T2		-24170	hnsc_tcga	Head and Neck Cancer	Head and Neck Squamous Cell Carcinoma	1	NA	NA	NA	1093	66		Negative	NA	NOT HISPANIC OR LATINO	No Extranodal Extension	NA	2012-02-13			C02.9	YES	NA	1970-03-01	C02.9	NO	0	1.3	2	Modified Radical Neck Dissection	YES	NA	No	M0	Stage II	T2	N0	N2b	6	G2	Head & Neck Squamous Cell Carcinoma		NA	HNSC	c4ad0479-8bef-4876-b423-fe83f222a60a	ed77d487-2a2d-4f30-b342-68b38ed68eee
TCGA-CV-A45O					-20868	hnsc_tcga	Head and Neck Cancer	Head and Neck Squamous Cell Carcinoma	NA	851	6651	NA	NA	57	NO	Negative	NA	NOT HISPANIC OR LATINO		NA	2013-08-22			C03.9	YES	240	1970-03-01	C03.9	NO	0	NA	14	Functional (Limited) Neck Dissection	YES	NA	No	M0	Stage III	T3	N0		NA	G2	Head & Neck Squamous Cell Carcinoma	NO	TRUE	HNSC	9E3E8014-04D4-40D8-B2DF-53C770E01DF2	FCE64B88-8BE6-4710-83BE-18C9AFDF13ED
TCGA-CV-A45P	Stage I	M0	T1		-30297	hnsc_tcga	Head and Neck Cancer	Head and Neck Squamous Cell Carcinoma	NA	639	5313	NA	NA	82	YES	Negative	NA	NOT HISPANIC OR LATINO	No Extranodal Extension	NA	2013-08-22			C02.9	YES	220	1970-03-01	C02.9	NO	0	NA	22	Functional (Limited) Neck Dissection	YES	NA	No	M0	Stage II	T2	N0	N0	NA	G2	Head & Neck Squamous Cell Carcinoma	YES	TRUE	HNSC	1C509BA7-2EDF-4428-BD39-109C78B3FB30	D909ECA7-B0A0-4A6F-A0FC-9868C95AE40C
TCGA-CV-A45Q					-25379	hnsc_tcga	Head and Neck Cancer	Head and Neck Squamous Cell Carcinoma	NA	NA	6297	NA	5152	69	YES	Negative	NA	NOT HISPANIC OR LATINO		NA	2013-08-22			C06.9	YES	230	1970-03-01	C06.9	NO	0	NA	20	Functional (Limited) Neck Dissection	YES	NA	No	M0	Stage IVC	T4a	N1		NA	G1	Head & Neck Squamous Cell Carcinoma	NO	TRUE	HNSC	650310FF-B75E-40D2-BB8D-80E4EFA36B2A	3E433F7A-34E1-4AF3-B5A0-8795BFB7B549
TCGA-CV-A45R	Stage III	M0	T2		-17125	hnsc_tcga	Head and Neck Cancer	Head and Neck Squamous Cell Carcinoma	NA	5480	5577	NA	NA	46	YES	Negative	NA	HISPANIC OR LATINO	No Extranodal Extension	NA	2013-08-19			C02.9	YES	230	1971-03-01	C02.9	NO	0	NA	26	Functional (Limited) Neck Dissection	YES	NA	No	M0	Stage III	T3	N1	N1	NA	G1	Head & Neck Squamous Cell Carcinoma	NO	TRUE	HNSC	9180E195-DAE9-4AF9-90CF-71778BC9AEFC	128615A3-D205-4918-A8F4-F33F67EA7702
TCGA-CV-A45T		M0	T1		-23452	hnsc_tcga	Head and Neck Cancer	Head and Neck Squamous Cell Carcinoma	NA	NA	5215	NA	4856	64	NO	Positive	NA	NOT HISPANIC OR LATINO	No Extranodal Extension	NA	2013-08-15			C02.9	YES	180	1970-03-01	C02.9	NO	0	NA	32	Functional (Limited) Neck Dissection	YES	NA	No	M0	Stage II	T2	N0	N0	NA	G3	Head & Neck Squamous Cell Carcinoma	NO	TRUE	HNSC	837BF19D-1E02-4C3D-9E65-8999F0652020	E7D39BA5-E156-47D5-940C-8E2BDCC30F4E
TCGA-CV-A45U	Stage IVA	M0	T4		-21746	hnsc_tcga	Head and Neck Cancer	Head and Neck Squamous Cell Carcinoma	NA	NA	4974	NA	1079	59	YES	Negative	NA	NOT HISPANIC OR LATINO	Microscopic Extension	NA	2013-08-20			C06.9	YES	260	1970-03-01	C06.9	NO	0	NA	13	Functional (Limited) Neck Dissection	YES	NA	No	M0	Stage IVA	T4	N0	N2b	NA	G1	Head & Neck Squamous Cell Carcinoma	YES	TRUE	HNSC	7CABCC66-F159-42DC-BD79-953BFFD93B8D	30928E2C-9AC9-4747-A4B9-D3751E2A4FB2
TCGA-CV-A45V	Stage IVA	M0	T4		-31936	hnsc_tcga	Head and Neck Cancer	Head and Neck Squamous Cell Carcinoma	NA	NA	4906	NA	32	87	NO	Negative	NA	NOT HISPANIC OR LATINO	No Extranodal Extension	NA	2013-08-22			C06.9	YES	330	1970-03-01	C06.9	NO	0	NA	NA		NO	NA	No	M0	Stage IVA	T4	N0	N0	NA	G1	Head & Neck Squamous Cell Carcinoma	NO	TRUE	HNSC	9413432E-24FE-428A-B464-1A5BCDBF5F74	3B4CFB6E-BACD-49BC-BB32-B517D3ED51A9
TCGA-CV-A45W	Stage II	M0	T2	NO	-27743	hnsc_tcga	Head and Neck Cancer	Head and Neck Squamous Cell Carcinoma	NA	NA	4786	NA	1398	75	NO	Negative	NA	NOT HISPANIC OR LATINO	No Extranodal Extension	NA	2013-08-14			C32.9	YES	50	1970-03-01	C32.9	NO	0	NA	48	Functional (Limited) Neck Dissection	YES	NA	No	M0	Stage III	T3	N0	N0	NA	G2	Head & Neck Squamous Cell Carcinoma	NO	TRUE	HNSC	2D74E19E-9677-491F-B9EA-4874DB64747A	7202CA4B-6CAF-4F4D-ADC9-4C59B00CBDC3
TCGA-CV-A45X	Stage IVA	M0	T2		-17464	hnsc_tcga	Head and Neck Cancer	Head and Neck Squamous Cell Carcinoma	NA	NA	4598	NA	198	47	YES	Negative	NA	NOT HISPANIC OR LATINO	No Extranodal Extension	NA	2013-08-13			C04.9	YES	220	1970-03-01	C04.9	NO	0	NA	32	Functional (Limited) Neck Dissection	YES	NA	No	M0	Stage IVA	T4a	N1	N2b	NA	G2	Head & Neck Squamous Cell Carcinoma	NO	TRUE	HNSC	3101785D-1CC2-4BD9-9FCE-02205D0548C6	114A5B4D-46F7-404F-A257-4F0E93E58B5E
TCGA-CV-A45Y	Stage IVA	M0	T4a		-22442	hnsc_tcga	Head and Neck Cancer	Head and Neck Squamous Cell Carcinoma	NA	NA	4481	NA	2703	61	YES	Negative	NA	HISPANIC OR LATINO	No Extranodal Extension	NA	2013-08-23			C32.9	YES	30	1970-03-01	C32.9	NO	0	NA	15	Functional (Limited) Neck Dissection	YES	NA	No	M0	Stage IVA	T4a	N0	N0	NA	G3	Head & Neck Squamous Cell Carcinoma	YES	TRUE	HNSC	468061C2-0ACB-4F67-A357-99CCBD81A8B7	26026E2F-B112-4535-97AC-6956CB267E9E
TCGA-CV-A45Z		M0	T1		-27397	hnsc_tcga	Head and Neck Cancer	Head and Neck Squamous Cell Carcinoma	NA	NA	4438	NA	1466	75	NO	Negative	NA	NOT HISPANIC OR LATINO	No Extranodal Extension	NA	2013-08-14			C32.9	YES	160	1970-03-01	C32.9	NO	0	NA	10	Functional (Limited) Neck Dissection	YES	NA	No	M0	Stage II	T2	N0	N0	NA	G3	Head & Neck Squamous Cell Carcinoma	NO	TRUE	HNSC	E7174299-3CA7-4D51-9048-3EF3EFDE4E5C	F844574A-CB7F-4F66-83D4-EE0CA41A63D1
TCGA-CV-A460		M0	T1		-26539	hnsc_tcga	Head and Neck Cancer	Head and Neck Squamous Cell Carcinoma	NA	NA	4002	NA	1838	72	YES	Negative	NA	NOT HISPANIC OR LATINO	Microscopic Extension	NA	2013-08-23			C32.9	YES	220	1970-03-01	C32.9	NO	0	NA	80	Functional (Limited) Neck Dissection	YES	NA	No	M0	Stage IVA	T3	N2b	N2	NA	G3	Head & Neck Squamous Cell Carcinoma	NO	TRUE	HNSC	E08FF4F7-62FD-4240-9E8B-C3AD7A9B2C44	904D5793-AE7F-492B-AAED-EA6CCA865D63
TCGA-CV-A461					-23955	hnsc_tcga	Head and Neck Cancer	Head and Neck Squamous Cell Carcinoma	NA	NA	2875	NA	2064	65	YES	Negative	NA	NOT HISPANIC OR LATINO		NA	2013-08-21			C32.9	YES	250	1970-03-01	C32.9	NO	0	NA	21	Functional (Limited) Neck Dissection	YES	NA	No	M0	Stage III	T3	N0		NA	G2	Head & Neck Squamous Cell Carcinoma	NO	TRUE	HNSC	3CF77E08-EA34-4091-B242-75C7E35FF699	AF7BB799-B091-45D9-A04E-074BB7840680
TCGA-CV-A463	Stage IVA	M0	T4a		-30095	hnsc_tcga	Head and Neck Cancer	Head and Neck Squamous Cell Carcinoma	NA	NA	1772	NA	23	82	NO	Negative	NA	HISPANIC OR LATINO	No Extranodal Extension	NA	2013-08-22			C04.9	YES	220	1970-03-01	C04.9	NO	0	NA	41	Functional (Limited) Neck Dissection	YES	NA	No	M0	Stage IVA	T4a	N0	N0	NA	G2	Head & Neck Squamous Cell Carcinoma	NO	TRUE	HNSC	FA9F6B24-16B4-4DDA-ACCE-BF2E186D365D	A53F3D07-0787-4DC1-940B-986A5188BDD9
TCGA-CV-A464	Stage III	M0	T3		-17669	hnsc_tcga	Head and Neck Cancer	Head and Neck Squamous Cell Carcinoma	NA	1722	1470	NA	NA	48	NO	Positive	NA	NOT HISPANIC OR LATINO	No Extranodal Extension	NA	2013-08-20			C06.0	YES	250	1970-03-01	C06.0	NO	0	NA	37	Functional (Limited) Neck Dissection	YES	NA	No	M0	Stage IVA	T4a	N0	N0	NA	G2	Head & Neck Squamous Cell Carcinoma	YES	TRUE	HNSC	27707915-D36E-4DA7-9B39-2FDD9CE0BDC5	9771B4B6-5AA1-4468-AA26-A89965DF19F2
TCGA-CV-A465	Stage III	M0	T3		-9015	hnsc_tcga	Head and Neck Cancer	Head and Neck Squamous Cell Carcinoma	NA	NA	1470	NA	215	24	NO	Negative	NA	HISPANIC OR LATINO	No Extranodal Extension	NA	2013-08-22			C02.9	YES	210	1970-03-01	C02.9	NO	0	NA	53	Functional (Limited) Neck Dissection	YES	NA	No	M0	Stage II	T2	N0	N0	NA	G1	Head & Neck Squamous Cell Carcinoma	NO	TRUE	HNSC	6F8B9C64-16F1-4CD0-9CD6-A3C27D311CF8	EC47C9AD-1489-47F4-A3EF-CD3998750A12
TCGA-CV-A468	Stage IVA	M0	T4a		-15372	hnsc_tcga	Head and Neck Cancer	Head and Neck Squamous Cell Carcinoma	NA	NA	4183	NA	464	42	YES	Negative	NA	HISPANIC OR LATINO	Microscopic Extension	NA	2013-08-21			C00.9	YES	220	1971-03-01	C00.9	NO	0	NA	34	Functional (Limited) Neck Dissection	YES	NA	No	M0	Stage III	T3	N2b	N2a	NA	G2	Head & Neck Squamous Cell Carcinoma	NO	TRUE	HNSC	1C801A6B-8407-46DA-B6CC-245F05418B9E	7DC1E99F-C601-48C2-8326-389D9F084E29
TCGA-CV-A6JD					-29988	hnsc_tcga	Head and Neck Cancer	Head and Neck Squamous Cell Carcinoma	NA	NA	430	NA	182	82	YES	Negative	NA	NOT HISPANIC OR LATINO		NA	2013-10-16			C04.9	YES	30	1970-03-01	C04.9	NO	0	NA	23	Functional (Limited) Neck Dissection	YES	NA	No	M0	Stage IVA	T4a	N0		NA	G3	Head & Neck Squamous Cell Carcinoma	NO	FALSE	HNSC	432FBB6C-331F-4D2D-834D-F6378D88107A	76CA4EDB-6CEF-4ADC-A65A-992CAAE74822
TCGA-CV-A6JE					-28658	hnsc_tcga	Head and Neck Cancer	Head and Neck Squamous Cell Carcinoma	3	750	844	NA	NA	78	NO	Negative	NA	NOT HISPANIC OR LATINO		NA	2013-10-16			C06.9	YES	30	1970-03-01	C06.9	NO	0	NA	34	Functional (Limited) Neck Dissection	YES	NA	No	M0	Stage II	T2	N0		7	G2	Head & Neck Squamous Cell Carcinoma	NO	FALSE	HNSC	E48C1481-E35C-49F9-9D13-A5D4085CF876	D7B44237-8616-41EC-AA7A-D07CC0F1070F
TCGA-CV-A6JM					-31147	hnsc_tcga	Head and Neck Cancer	Head and Neck Squamous Cell Carcinoma	NA	NA	710	NA	194	85	NO	Negative	NA	NOT HISPANIC OR LATINO		NA	2013-10-17			C32.9	YES	30	1970-03-01	C32.9	NO	0	NA	38	Functional (Limited) Neck Dissection	YES	NA	No	M0	Stage IVA	T4a	N0		NA	G2	Head & Neck Squamous Cell Carcinoma	YES	FALSE	HNSC	08C95E8F-AA2F-4163-AC43-096053EC6886	4CDFFCE3-6AA0-4C71-B87C-F12B9518772A
TCGA-CV-A6JN					-19635	hnsc_tcga	Head and Neck Cancer	Head and Neck Squamous Cell Carcinoma	8	717	721	NA	NA	53	YES	Negative	NA	NOT HISPANIC OR LATINO		NA	2013-10-21			C06.9	YES	30	1970-03-01	C06.9	NO	0	NA	27	Functional (Limited) Neck Dissection	YES	NA	No	M0	Stage II	T2	N0		7	G1	Head & Neck Squamous Cell Carcinoma	NO	FALSE	HNSC	10593E5B-7ACB-498B-BDF7-705E3E2BC443	B110B63B-5A0D-4B78-84AE-7A3E6BF3C9CF
TCGA-CV-A6JO	Stage IVA	M0	T3		-25377	hnsc_tcga	Head and Neck Cancer	Head and Neck Squamous Cell Carcinoma	NA	NA	696	NA	197	69	YES	Negative	NA	NOT HISPANIC OR LATINO	Gross Extension	NA	2013-12-06			C02.9	YES	170	1970-03-01	C02.9	NO	0	NA	51	Functional (Limited) Neck Dissection	YES	NA	No	M0	Stage IVA	T4	N2c	N2c	NA	G2	Head & Neck Squamous Cell Carcinoma	YES	TRUE	HNSC	865C624A-D52D-4C53-9904-40014CB8CCE7	C29430E1-7C15-4B70-A996-8FCE02175600
TCGA-CV-A6JT	Stage II	M0	T2		-23806	hnsc_tcga	Head and Neck Cancer	Head and Neck Squamous Cell Carcinoma	NA	670	631	NA	NA	65	YES	Negative	NA	NOT HISPANIC OR LATINO	No Extranodal Extension	NA	2013-12-12			C02.9	YES	30	1970-03-01	C02.9	NO	0	NA	34	Functional (Limited) Neck Dissection	YES	NA	No	M0	Stage II	T2	N0	N0	NA	G2	Head & Neck Squamous Cell Carcinoma	NO	FALSE	HNSC	6A82A217-F7A2-4697-98A6-6C6553E8FAC1	C2469951-9C8C-4B1F-901F-BE6FBDAEC961
TCGA-CV-A6JU	Stage IVB	M0	T4b		-22591	hnsc_tcga	Head and Neck Cancer	Head and Neck Squamous Cell Carcinoma	12	110	588	NA	NA	61	YES	Negative	NA	NOT HISPANIC OR LATINO	No Extranodal Extension	NA	2013-12-13			C02.9	YES	30	1970-03-01	C02.9	NO	0	NA	93	Functional (Limited) Neck Dissection	YES	NA	No	M0	Stage IVA	T4a	N0	N0	7	G2	Head & Neck Squamous Cell Carcinoma	NO	FALSE	HNSC	B1B3983D-37D2-4BEF-BD17-708E3E600146	C5242C59-5973-45BF-9FD0-DBC7A42BC2CC
TCGA-CV-A6JY	Stage IVA	M0	T4a		-25321	hnsc_tcga	Head and Neck Cancer	Head and Neck Squamous Cell Carcinoma	NA	646	567	NA	NA	69	YES	Negative	NA	NOT HISPANIC OR LATINO	No Extranodal Extension	NA	2013-12-13			C06.9	YES	30	1970-03-01	C06.9	NO	0	NA	27	Functional (Limited) Neck Dissection	YES	NA	No	M0	Stage IVA	T4a	N0	N0	NA	G1	Head & Neck Squamous Cell Carcinoma	NO	FALSE	HNSC	0625DF42-740F-4E52-8F9E-0F5B7DEE251B	D280D9F7-D6C5-48C9-8A3C-E71A9060E762
TCGA-CV-A6JZ	Stage II	M0	T2		-25182	hnsc_tcga	Head and Neck Cancer	Head and Neck Squamous Cell Carcinoma	4	680	564	NA	NA	68	YES	Negative	NA	NOT HISPANIC OR LATINO	No Extranodal Extension	NA	2013-12-16			C06.9	YES	30	1970-03-01	C06.9	NO	0	NA	66	Functional (Limited) Neck Dissection	YES	NA	No	M0	Stage IVA	T4a	N0	N0	7	G2	Head & Neck Squamous Cell Carcinoma	YES	FALSE	HNSC	4CACFF9D-CC50-43A5-A227-16923ADA7467	C205CDCB-CDFF-414E-9BE2-8C53DCCE3BA3
TCGA-CV-A6K0	Stage I	M0	T1		-21488	hnsc_tcga	Head and Neck Cancer	Head and Neck Squamous Cell Carcinoma	1	606	568	NA	NA	58	NO	Negative	NA	NOT HISPANIC OR LATINO	No Extranodal Extension	NA	2013-12-16			C02.9	YES	170	1970-03-01	C02.9	NO	0	NA	20	Functional (Limited) Neck Dissection	YES	NA	No	M0	Stage II	T2	N0	N0	6	G3	Head & Neck Squamous Cell Carcinoma	YES	TRUE	HNSC	D5E136FD-B6FC-4400-88D3-30D10CBD9801	398932AB-74C1-400D-8289-F2C1C8D85E1C
TCGA-CV-A6K1	Stage IVA	M0	T4a		-23848	hnsc_tcga	Head and Neck Cancer	Head and Neck Squamous Cell Carcinoma	6	527	549	NA	NA	65	YES	Negative	NA	NOT HISPANIC OR LATINO	No Extranodal Extension	NA	2013-12-16			C32.9	YES	20	1970-03-01	C32.9	NO	0	NA	44	Functional (Limited) Neck Dissection	YES	NA	No	M0	Stage IVA	T4a	N0	N0	7	G2	Head & Neck Squamous Cell Carcinoma	NO	FALSE	HNSC	3FB3D96E-85EF-4071-A220-2382F8D9DE82	43115789-CCA5-4DC0-8377-E47B90C3F16F
TCGA-CV-A6K2	Stage IVA	M0	T4		-29114	hnsc_tcga	Head and Neck Cancer	Head and Neck Squamous Cell Carcinoma	7	NA	547	NA	317	79	YES	Negative	NA	NOT HISPANIC OR LATINO	No Extranodal Extension	NA	2014-01-17			C06.9	YES	30	1970-03-01	C06.9	NO	0	NA	49	Functional (Limited) Neck Dissection	YES	NA	No	M0	Stage II	T2	N0	N0	6	G1	Head & Neck Squamous Cell Carcinoma	YES	FALSE	HNSC	A1066AEA-3122-4887-83D0-132EF84C06E1	BA89E258-169F-42AE-82B3-7CE692E67EE9
TCGA-CX-7082	Stage IVA		T2	NO	-30174	hnsc_tcga	Head and Neck Cancer	Head and Neck Squamous Cell Carcinoma	0	NA	NA	NA	11	82		Close	NA	NOT HISPANIC OR LATINO	Gross Extension	NA	2011-10-01			C14.8	YES	NA	1970-03-01	C14.8	NO	0	0.6	15	Functional (Limited) Neck Dissection	YES	NA	No	M0	Stage II	T2	N0	N2b	0	G2	Head & Neck Squamous Cell Carcinoma		NA	HNSC	47d1fcaf-3c01-43ba-9a21-0870b4ea2976	3774c511-1e37-4d82-a040-a647939de80b
TCGA-CX-7085	Stage I		T1	NO	-28221	hnsc_tcga	Head and Neck Cancer	Head and Neck Squamous Cell Carcinoma	0	15	NA	NA	NA	77		Close	NA	NOT HISPANIC OR LATINO	No Extranodal Extension	NA	2011-10-01			C02.9	YES	NA	1970-03-01	C02.9	NO	0	2.1	25	Functional (Limited) Neck Dissection	YES	NA	No	M0	Stage III	T3	N0	N0	0	G2	Head & Neck Squamous Cell Carcinoma		NA	HNSC	2a7b4613-f908-4e78-98ed-857dcd7ed774	a07e086c-1d2d-4d92-a663-ecd7ea4dbd73
TCGA-CX-7086	Stage III		T3	YES	-19434	hnsc_tcga	Head and Neck Cancer	Head and Neck Squamous Cell Carcinoma	7	237	NA	NA	NA	53		Negative	NA	NOT HISPANIC OR LATINO		NA	2011-10-01			C04.9	YES	NA	1970-03-01	C04.9	NO	0	0.6	64	Modified Radical Neck Dissection	YES	NA	No	M0	Stage IVA	T4a	N2c	N1	7	G2	Head & Neck Squamous Cell Carcinoma		NA	HNSC	ad6c9d09-2c03-4786-a72d-dd2aa5f603d4	b293a736-9a82-4ad9-bf7e-9e2cea09ddbc
TCGA-CX-7219	Stage IVA		T4a	YES	-17222	hnsc_tcga	Head and Neck Cancer	Head and Neck Squamous Cell Carcinoma	12	828	NA	NA	NA	47		Close	NA	NOT HISPANIC OR LATINO	Gross Extension	NA	2011-10-01			C04.9	YES	NA	1970-03-01	C04.9	NO	0	2.7	76	Modified Radical Neck Dissection	YES	NA	No	M0	Stage IVA	T4a	N2c	N2c	7	G2	Head & Neck Squamous Cell Carcinoma		NA	HNSC	3ce5b304-6068-43ba-9e70-e4357d6d7a2a	e1d63fe2-8e58-496a-8660-4f1ee422bfc8
TCGA-CX-A4AQ	Stage IVA	M0	T2	YES	-20709	hnsc_tcga	Head and Neck Cancer	Head and Neck Squamous Cell Carcinoma	1	1555	1659	NA	NA	56	YES	Positive	NA	NOT HISPANIC OR LATINO	No Extranodal Extension	NA	2015-03-31			C04.9	YES	190	1970-03-01	C04.9	NO	0	NA	41	Functional (Limited) Neck Dissection	YES	NA	No	M0	Stage IVA	T1	N2a	N2b	7	G3	Head & Neck Squamous Cell Carcinoma	NO	FALSE	HNSC	18334157-AA38-4859-A786-99A920A1FBE3	C0A0E9A4-99AC-43D4-B51F-98D9403AFAFC
TCGA-D6-6515	Stage II		T2		-30099	hnsc_tcga	Head and Neck Cancer	Head and Neck Squamous Cell Carcinoma	NA	NA	NA	NA	403	82		Close	NA	NOT HISPANIC OR LATINO		NA	2011-09-05			C02.9	YES	NA	1970-03-01	C02.9	NO	0	1.2	NA		NO	NA	No	M0	Stage II	T2	N0	N0	NA	G3	Head & Neck Squamous Cell Carcinoma		NA	HNSC	8e0e456e-85ee-4de5-8f0b-72393d6acde0	4453d224-f846-4cee-972f-8438c964913b
TCGA-D6-6516	Stage I		T1	NO	-25242	hnsc_tcga	Head and Neck Cancer	Head and Neck Squamous Cell Carcinoma	NA	325	NA	NA	NA	69		Close	NA	NOT HISPANIC OR LATINO		NA	2011-09-22			C00.9	YES	NA	1970-03-01	C00.9	NO	0	0.7	8	Functional (Limited) Neck Dissection	YES	NA	No	M0	Stage III	T1	N1	N0	NA	G2	Head & Neck Squamous Cell Carcinoma		NA	HNSC	e4733700-ff23-43ff-bfa0-e679ce9352c9	2d8d11be-421d-4f96-b5d6-4cbc632f11f3
TCGA-D6-6517	Stage III		T3		-21791	hnsc_tcga	Head and Neck Cancer	Head and Neck Squamous Cell Carcinoma	3	250	NA	NA	NA	59		Negative	NA	NOT HISPANIC OR LATINO		NA	2011-09-22			C32.9	YES	NA	1970-03-01	C32.9	NO	0	0.6	3	Functional (Limited) Neck Dissection	YES	NA	No	M0	Stage III	T3	N0	N0	6	G2	Head & Neck Squamous Cell Carcinoma		NA	HNSC	ebe99910-e9f2-43dc-ad57-ac2f610b60c8	8c099f45-3fd6-4966-8cdb-ca4b9288b1a2
TCGA-D6-6823	Stage II		T2		-18611	hnsc_tcga	Head and Neck Cancer	Head and Neck Squamous Cell Carcinoma	1	605	NA	NA	NA	50		Close	NA	NOT HISPANIC OR LATINO	No Extranodal Extension	NA	2011-10-07			C02.9	YES	NA	1970-03-01	C02.9	NO	0	1	6	Functional (Limited) Neck Dissection	YES	NA	No	M0	Stage III	T3	N1	N0	2	G2	Head & Neck Squamous Cell Carcinoma		NA	HNSC	fbdab01c-191c-4aef-9451-ca3afec55fa1	2da83450-04c2-44d0-ab8a-9cc876242d5a
TCGA-D6-6824	Stage IVA		T4a		-22633	hnsc_tcga	Head and Neck Cancer	Head and Neck Squamous Cell Carcinoma	1	77	NA	NA	NA	61		Close	NA	NOT HISPANIC OR LATINO	No Extranodal Extension	NA	2011-09-07			C32.9	YES	NA	1970-03-01	C32.9	NO	0	1	25	Functional (Limited) Neck Dissection	YES	NA	No	M0	Stage IVA	T4a	N1	N0	7	G2	Head & Neck Squamous Cell Carcinoma		NA	HNSC	63f6a127-e4e8-4e1c-8236-a2adb9594c8f	2e1366b9-95b7-4a0d-81f0-7ec14e4f4592
TCGA-D6-6825	Stage I		T1		-26976	hnsc_tcga	Head and Neck Cancer	Head and Neck Squamous Cell Carcinoma	2	153	NA	NA	NA	73		Negative	NA	NOT HISPANIC OR LATINO	No Extranodal Extension	NA	2011-10-07			C02.9	YES	NA	1970-03-01	C02.9	NO	0	1	9	Functional (Limited) Neck Dissection	YES	NA	No	M0	Stage III	T3	N0	N0	5	G2	Head & Neck Squamous Cell Carcinoma		NA	HNSC	42bc2336-2408-441a-83b9-aadc9700f750	d9e2f5aa-a6e2-491a-9dbc-e5d10b4aba58
TCGA-D6-6826	Stage IVA		T4a		-23722	hnsc_tcga	Head and Neck Cancer	Head and Neck Squamous Cell Carcinoma	NA	154	NA	NA	NA	64		Negative	NA	NOT HISPANIC OR LATINO	No Extranodal Extension	NA	2011-10-07			C32.9	YES	NA	1970-03-01	C32.9	NO	0	0.9	5	Functional (Limited) Neck Dissection	YES	NA	No	M0	Stage IVA	T4a	N2	N2b	NA	G2	Head & Neck Squamous Cell Carcinoma		NA	HNSC	31243867-8e9f-46e9-a213-b83544eb8028	1737989d-8463-4761-b111-53e4fd396375
TCGA-D6-6827	Stage I		T1		-20175	hnsc_tcga	Head and Neck Cancer	Head and Neck Squamous Cell Carcinoma	NA	128	NA	NA	NA	55		Close	NA	NOT HISPANIC OR LATINO	No Extranodal Extension	NA	2011-10-07			C00.9	YES	NA	1970-03-01	C00.9	NO	0	0.6	1	Functional (Limited) Neck Dissection	YES	NA	No	M0	Stage III	T1	N1	N0	NA	G3	Head & Neck Squamous Cell Carcinoma		NA	HNSC	3c5bc678-41e9-46b3-9686-5cd95659ab71	c53d6135-c614-45f4-8f41-49b20ed4a549
TCGA-D6-8568	Stage II	M0	T2	NO	-22796	hnsc_tcga	Head and Neck Cancer	Head and Neck Squamous Cell Carcinoma	5	106	NA	NA	NA	62	NO	Negative	NA	NOT HISPANIC OR LATINO	No Extranodal Extension	NA	2012-07-23			C32.9	YES	NA	1971-03-01	C32.9	NO	0	0.8	3	Functional (Limited) Neck Dissection	YES	NA	No	M0	Stage II	T2	N0	N0	2	G2	Head & Neck Squamous Cell Carcinoma	NO	NA	HNSC	5ed786f3-1d15-4079-bb8f-2f34ef305644	eac181d7-f8b8-4350-92aa-62d3fd1bd86b
TCGA-D6-8569	Stage II	M0	T2	NO	-19212	hnsc_tcga	Head and Neck Cancer	Head and Neck Squamous Cell Carcinoma	NA	128	NA	NA	NA	52	NO	Negative	NA	NOT HISPANIC OR LATINO	No Extranodal Extension	NA	2012-07-23			C02.9	YES	NA	1971-03-01	C02.9	NO	0	0.5	7	Functional (Limited) Neck Dissection	YES	NA	No	M0	Stage II	T2	N0	N0	NA	G2	Head & Neck Squamous Cell Carcinoma	NO	NA	HNSC	83aa326a-09bf-41cf-945e-6b251f11f731	ed1c3805-10b1-4026-8129-b5e6506482fd
TCGA-D6-A4Z9	Stage IVA	M0	T2	NO	-21659	hnsc_tcga	Head and Neck Cancer	Head and Neck Squamous Cell Carcinoma	NA	112	24	NA	NA	59	NO	Negative	NA	NOT HISPANIC OR LATINO	No Extranodal Extension	NA	2013-01-23			C02.9	YES	110	1971-03-01	C02.9	NO	0	NA	10	Modified Radical Neck Dissection	YES	NA	No	M0	Stage IVA	T2	N2	N2	NA	G2	Head & Neck Squamous Cell Carcinoma	NO	FALSE	HNSC	55A9E8AE-95A3-485C-8DF0-78740FCD58D8	22EB62C6-5C59-433E-B23B-ABADF8972352
TCGA-D6-A4ZB	Stage III	M0	T3	NO	-22455	hnsc_tcga	Head and Neck Cancer	Head and Neck Squamous Cell Carcinoma	NA	104	14	NA	NA	61	NO	Negative	NA	NOT HISPANIC OR LATINO	No Extranodal Extension	NA	2013-01-15			C02.9	YES	80	1971-03-01	C02.9	NO	0	NA	15	Functional (Limited) Neck Dissection	YES	NA	No	M0	Stage III	T3	N0	N0	NA	G2	Head & Neck Squamous Cell Carcinoma	NO	FALSE	HNSC	E08E1D99-81E1-454A-9BDA-CDA92C9E22B4	F6B63E96-D19A-4E7B-A91E-4E3249278E77
TCGA-D6-A6EK	Stage III	M0	T2	NO	-24558	hnsc_tcga	Head and Neck Cancer	Head and Neck Squamous Cell Carcinoma	NA	483	211	NA	NA	67	YES	Negative	NA	NOT HISPANIC OR LATINO	No Extranodal Extension	NA	2014-03-31			C32.9	YES	130	1971-03-01	C32.9	NO	0	NA	3	Modified Radical Neck Dissection	YES	NA	No	M0	Stage IVA	T4	N1	N1	NA	G1	Head & Neck Squamous Cell Carcinoma	NO	TRUE	HNSC	F248D7B9-6EA7-44EF-8AF6-8BEDA6C6BA4A	0A64B28D-8DDE-4EAF-BAC5-217406CBC4C6
TCGA-D6-A6EM	Stage III	M0	T2	NO	-23865	hnsc_tcga	Head and Neck Cancer	Head and Neck Squamous Cell Carcinoma	NA	232	155	NA	NA	65	YES	Negative	NA	NOT HISPANIC OR LATINO	No Extranodal Extension	NA	2014-03-31			C06.9	YES	120	1970-03-01	C06.9	NO	0	NA	17	Modified Radical Neck Dissection	YES	NA	No	M0	Stage III	T2	N1	N1	NA	G2	Head & Neck Squamous Cell Carcinoma	YES	TRUE	HNSC	F1099653-FD32-4459-86EB-40E0412CE2FA	5BB2EA1D-5646-45F4-844A-2DC775EB788B
TCGA-D6-A6EN	Stage III	M0	T2	YES	-26294	hnsc_tcga	Head and Neck Cancer	Head and Neck Squamous Cell Carcinoma	NA	439	118	NA	NA	71	YES	Negative	NA	NOT HISPANIC OR LATINO	No Extranodal Extension	NA	2014-03-31			C06.0	YES	80	1970-03-01	C06.0	NO	0	NA	15	Modified Radical Neck Dissection	YES	NA	No	M0	Stage III	T3	N0	N1	NA	G3	Head & Neck Squamous Cell Carcinoma	NO	TRUE	HNSC	F13DFDCC-02F8-4A4C-A2FC-E6A45499BD4C	13F44682-A9E0-4968-8F40-5BB43191D38C
TCGA-D6-A6EO	Stage IVA	M0	T4a	NO	-16185	hnsc_tcga	Head and Neck Cancer	Head and Neck Squamous Cell Carcinoma	NA	429	120	NA	NA	44	YES	Negative	NA	NOT HISPANIC OR LATINO	Gross Extension	NA	2014-03-31			C04.9	YES	140	1971-03-01	C04.9	NO	0	NA	9	Modified Radical Neck Dissection	YES	NA	No	M0	Stage IVA	T4a	N0	N0	NA	G2	Head & Neck Squamous Cell Carcinoma	NO	TRUE	HNSC	42D342D9-F8A5-4940-9B6B-5773D66055F9	089E6C06-1457-4201-8642-49FBF9EDD4E2
TCGA-D6-A6EP	Stage III	M0	T3	NO	-22674	hnsc_tcga	Head and Neck Cancer	Head and Neck Squamous Cell Carcinoma	NA	424	107	NA	NA	62	NO	Negative	NA	NOT HISPANIC OR LATINO	No Extranodal Extension	NA	2014-03-31			C13.9	YES	300	1972-03-01	C13.9	NO	0	NA	4	Functional (Limited) Neck Dissection	YES	NA	No	M0	Stage III	T3	N0	N0	NA	G3	Head & Neck Squamous Cell Carcinoma	NO	TRUE	HNSC	37159B2B-E564-47A9-ADAA-91B9571EF9DE	434ADBA3-549A-45F7-B89B-76737678AE0E
TCGA-D6-A6EQ	Stage IVA	M0	T4a	NO	-20876	hnsc_tcga	Head and Neck Cancer	Head and Neck Squamous Cell Carcinoma	NA	368	86	NA	NA	57	YES	Negative	NA	NOT HISPANIC OR LATINO	No Extranodal Extension	NA	2014-03-31			C32.9	YES	60	1971-03-01	C32.9	NO	0	NA	20	Modified Radical Neck Dissection	YES	NA	No	M0	Stage IVA	T4a	N1	N1	NA	G3	Head & Neck Squamous Cell Carcinoma	NO	TRUE	HNSC	1ACDA00D-04FB-4D71-99A4-996F92601827	041D7DE0-FDEE-4F6B-9945-058F8BAB509C
TCGA-D6-A6ES	Stage IVA	M0	T4a	NO	-18408	hnsc_tcga	Head and Neck Cancer	Head and Neck Squamous Cell Carcinoma	NA	24	69	NA	NA	50	YES	Negative	NA	NOT HISPANIC OR LATINO	No Extranodal Extension	NA	2014-03-31			C32.9	YES	60	1970-03-01	C32.9	NO	0	NA	13	Modified Radical Neck Dissection	YES	NA	No	M0	Stage IVA	T4a	N1	N0	NA	G2	Head & Neck Squamous Cell Carcinoma	NO	TRUE	HNSC	B47FB978-2DFB-4ABC-A5AF-6E14DD684182	F99DC3BF-E91D-4011-B62A-2653B53417F0
TCGA-D6-A74Q	Stage IVA	M0	T4a	NO	-24702	hnsc_tcga	Head and Neck Cancer	Head and Neck Squamous Cell Carcinoma	NA	338	108	NA	NA	67	YES	Negative	NA	NOT HISPANIC OR LATINO	No Extranodal Extension	NA	2014-03-31			C32.9	YES	80	1971-03-01	C32.9	NO	0	NA	7	Functional (Limited) Neck Dissection	YES	NA	No	M0	Stage IVA	T4a	N0	N0	NA	G3	Head & Neck Squamous Cell Carcinoma	NO	FALSE	HNSC	F04F1C1C-6D6D-4A2B-BA88-110B08FCC596	C03B3DFA-7B9B-4A21-9274-D174BC14440B
TCGA-DQ-5624			TX	NO	-15867	hnsc_tcga	Head and Neck Cancer	Head and Neck Squamous Cell Carcinoma	NA	1149	NA	NA	NA	43		Negative	NA	NOT HISPANIC OR LATINO	Microscopic Extension	NA	2011-03-22			C02.9	YES	NA	1970-03-01	C02.9	NO	0	0.7	24	Functional (Limited) Neck Dissection	YES	NA	No	M0	Stage IVA	T4a	N1	NX	NA	G2	Head & Neck Squamous Cell Carcinoma		NA	HNSC	b4a41682-4aca-4f1d-bacd-66f5e6ec7466	39a74037-6c20-4713-a6aa-e972218eff90
TCGA-DQ-5625			TX	NO	-19211	hnsc_tcga	Head and Neck Cancer	Head and Neck Squamous Cell Carcinoma	15	1058	NA	NA	NA	52		Negative	NA	NOT HISPANIC OR LATINO	No Extranodal Extension	NA	2011-03-24			C02.9	YES	NA	1970-03-01	C02.9	NO	0	0.7	19	Functional (Limited) Neck Dissection	YES	NA	No	M0	Stage II	T2	N0	NX	7	G2	Head & Neck Squamous Cell Carcinoma		NA	HNSC	53d9a130-4a3a-4491-85cd-9a44415a1632	74856e66-109f-4a68-a496-8fa66729fe1f
TCGA-DQ-5629			TX	NO	-23550	hnsc_tcga	Head and Neck Cancer	Head and Neck Squamous Cell Carcinoma	3	516	NA	NA	NA	64		Negative	NA	NOT HISPANIC OR LATINO	No Extranodal Extension	NA	2011-04-04		Negative	C32.9	YES	NA	1970-03-01	C32.9	NO	0	0.6	47	Functional (Limited) Neck Dissection	YES	NA	Yes	M0	Stage IVA	T4a	N2c	NX	4	G2	Head & Neck Squamous Cell Carcinoma		NA	HNSC	e95e9e7d-a1ed-46eb-9cf8-1d355bf0577f	57ea3eed-f8e2-4310-90c0-50d89f818a12
TCGA-DQ-5630			TX	NO	-26855	hnsc_tcga	Head and Neck Cancer	Head and Neck Squamous Cell Carcinoma	4	477	NA	NA	NA	73		Negative	NA	NOT HISPANIC OR LATINO	No Extranodal Extension	NA	2011-03-22			C02.9	YES	NA	1970-03-01	C02.9	NO	0	1.1	49	Functional (Limited) Neck Dissection	YES	NA	No	M0	Stage III	T3	N1	NX	3	G2	Head & Neck Squamous Cell Carcinoma		NA	HNSC	91a712b5-a724-48d0-ba06-4f6857683463	a0cdb208-e66f-4ad7-86fa-5077145a4a68
TCGA-DQ-5631			TX	YES	-19172	hnsc_tcga	Head and Neck Cancer	Head and Neck Squamous Cell Carcinoma	1	548	NA	NA	548	52		Negative	NA	NOT HISPANIC OR LATINO	Microscopic Extension	NA	2011-03-22			C02.9	YES	NA	1970-03-01	C02.9	NO	0	0.5	20	Functional (Limited) Neck Dissection	YES	NA	No	M0	Stage IVA	T3	N2b	NX	0	G3	Head & Neck Squamous Cell Carcinoma		NA	HNSC	10b3f56a-e61e-486b-8d3c-176668d5dc34	2e4aa773-6094-46bd-a97f-9694e80c71cf
TCGA-DQ-7588			TX	NO	-24106	hnsc_tcga	Head and Neck Cancer	Head and Neck Squamous Cell Carcinoma	10	NA	NA	NA	427	66		Negative	NA	NOT HISPANIC OR LATINO	No Extranodal Extension	NA	2012-02-16		Negative	C14.8	YES	NA	1970-03-01	C14.8	NO	0	0.4	30	Functional (Limited) Neck Dissection	YES	NA	No	M0	Stage III	T2	N1	NX	4	G3	Head & Neck Squamous Cell Carcinoma		NA	HNSC	8a3fdb52-63ef-48d7-95ff-167829825eb9	7bb23ad8-c09c-4b9e-b87d-a7a0e74ce05e
TCGA-DQ-7591			TX		-22798	hnsc_tcga	Head and Neck Cancer	Head and Neck Squamous Cell Carcinoma	3	360	NA	NA	NA	62			NA	NOT HISPANIC OR LATINO		NA	2012-02-16		Positive	C01	YES	NA	1970-03-01	C01.9	NO	0	0.8	NA		NO	NA	No	M0	Stage IVA	T4a	N2b	NX	3	G4	Head & Neck Squamous Cell Carcinoma		NA	HNSC	3ef779cf-772e-445e-93c8-e1094ea8b878	fb144a86-0eb9-4754-bd74-8ba4bffe7666
TCGA-DQ-7592			TX	NO	-21041	hnsc_tcga	Head and Neck Cancer	Head and Neck Squamous Cell Carcinoma	3	299	NA	NA	NA	57		Negative	NA	NOT HISPANIC OR LATINO		NA	2012-02-16		Negative	C02.9	YES	NA	1970-03-01	C02.9	NO	0	1	42	Functional (Limited) Neck Dissection	YES	NA	No	M0	Stage IVA	T4a	N2b	NX	1	G2	Head & Neck Squamous Cell Carcinoma		NA	HNSC	d82e6c52-9ea4-4f60-989c-cf95d464fd6f	eca57bc5-dbc4-4fbd-87cc-1ebbf90ef9c9
TCGA-F7-7848	Stage IVA	M0	T4a	NO	-17251	hnsc_tcga	Head and Neck Cancer	Head and Neck Squamous Cell Carcinoma	1	35	NA	NA	NA	47		Negative	NA	NOT HISPANIC OR LATINO		NA	2012-02-20			C32.9	YES	NA	1970-03-01	C32.9	NO	0	1.8	4	Functional (Limited) Neck Dissection	YES	NA	No	M0	Stage IVA	T4a	N1	N1	1	G2	Head & Neck Squamous Cell Carcinoma		NA	HNSC	829b41b1-693b-4f7f-a5c2-68c14b079aae	f7831fa0-1f1d-4623-aba0-8117b925a1ee
TCGA-F7-8298	Stage I	M0	T1		-21445	hnsc_tcga	Head and Neck Cancer	Head and Neck Squamous Cell Carcinoma	1	14	NA	NA	NA	58		Negative	NA	NOT HISPANIC OR LATINO		NA	2012-06-13			C32.9	YES	NA	1970-03-01	C32.9	NO	0	2.3	14	Radical Neck Dissection	YES	NA	No	M0	Stage I	T1	N0	N0	3	G1	Head & Neck Squamous Cell Carcinoma		NA	HNSC	b4d5299d-1f25-4565-b612-0a0a4d6656ec	94c71079-a453-4a4c-b52a-ab686bc83b65
TCGA-F7-8489	Stage II	M0	T2	NO	-17873	hnsc_tcga	Head and Neck Cancer	Head and Neck Squamous Cell Carcinoma	NA	14	NA	NA	NA	48	NO	Close	NA	NOT HISPANIC OR LATINO	No Extranodal Extension	NA	2012-09-10			C04.9	YES	NA	1970-03-01	C04.9	NO	0	1.8	8	Functional (Limited) Neck Dissection	YES	NA	No	M0	Stage II	T2	N0	N0	NA	G1	Head & Neck Squamous Cell Carcinoma	NO	NA	HNSC	513b1a26-8f1b-49a0-8957-de10930e6c98	da51b42b-2758-4286-a48a-47104159c94a
TCGA-F7-A50G	Stage III	M0	T3	NO	-24285	hnsc_tcga	Head and Neck Cancer	Head and Neck Squamous Cell Carcinoma	NA	15	198	NA	NA	66		Close	NA	NOT HISPANIC OR LATINO	No Extranodal Extension	NA	2013-02-28			C02.9	YES	690	1970-03-01	C02.9	NO	0	NA	9	Functional (Limited) Neck Dissection	YES	NA	No					N1	NA	G1	Head & Neck Squamous Cell Carcinoma		TRUE	HNSC	85AE3B0F-3A54-4A23-BE25-9A4DEEBBC011	0B1071AA-EFCD-4D53-8AC7-0047F0B82D65
TCGA-F7-A50I	Stage IVA	M0	T4a	YES	-26373	hnsc_tcga	Head and Neck Cancer	Head and Neck Squamous Cell Carcinoma	1	92	335	NA	NA	72		Positive	NA		Gross Extension	NA	2013-02-28			C32.9	YES	90	1970-03-01	C32.9	NO	0	NA	NA		NO	NA	No					N0	1	G2	Head & Neck Squamous Cell Carcinoma		TRUE	HNSC	795677D4-DC60-4EBD-A9DF-E88713E5A4AA	5EB175FF-1B47-463A-8F16-4B59914457BC
TCGA-F7-A50J	Stage III	M0	T3	YES	-24758	hnsc_tcga	Head and Neck Cancer	Head and Neck Squamous Cell Carcinoma	0	156	317	NA	NA	67		Close	NA	NOT HISPANIC OR LATINO	No Extranodal Extension	NA	2013-02-28			C02.9	YES	120	1971-03-01	C02.9	NO	0	NA	10	Modified Radical Neck Dissection	YES	NA	No					N0	1	G2	Head & Neck Squamous Cell Carcinoma		TRUE	HNSC	15E43EE8-3080-4895-84FB-A24AD3A68B97	47B80E6F-04A7-446F-B7F0-A5DC8D282664
TCGA-F7-A61S	Stage III	M0	T3		-22655	hnsc_tcga	Head and Neck Cancer	Head and Neck Squamous Cell Carcinoma	1	3	240	NA	NA	62		Negative	NA	NOT HISPANIC OR LATINO	No Extranodal Extension	NA	2013-05-28			C02.9	YES	870	1971-03-01	C02.9	NO	0	NA	6	Radical Neck Dissection	YES	NA	No	MX		TX	NX	N0	2	G1	Head & Neck Squamous Cell Carcinoma	NO	TRUE	HNSC	7A211CE6-3162-4F58-BF24-9B68562913D5	C5EF77E2-A034-48BA-89D3-2A3D47B858B8
TCGA-F7-A61V	Stage II	M0	T2	NO	-19857	hnsc_tcga	Head and Neck Cancer	Head and Neck Squamous Cell Carcinoma	NA	9	219	NA	NA	54		Negative	NA	NOT HISPANIC OR LATINO	No Extranodal Extension	NA	2013-05-28		Negative	C01	YES	240	1970-03-01	C01.9	NO	0	NA	62	Radical Neck Dissection	YES	NA	No	MX		TX	NX	N0	NA	G1	Head & Neck Squamous Cell Carcinoma	NO	TRUE	HNSC	0B67F9BB-E469-4B4C-9CE6-6AF1C7B1AAB2	E295DCAD-2459-4621-9174-94915E64B274
TCGA-F7-A61W	Stage IVA	M0	T2	YES	-18879	hnsc_tcga	Head and Neck Cancer	Head and Neck Squamous Cell Carcinoma	1	14	164	NA	NA	51		Negative	NA	NOT HISPANIC OR LATINO	Microscopic Extension	NA	2013-05-28			C02.9	YES	310	1971-03-01	C02.9	NO	0	NA	9	Radical Neck Dissection	YES	NA	No	MX		TX	NX	N2b	7	G2	Head & Neck Squamous Cell Carcinoma	NO	TRUE	HNSC	8F6C64C9-7799-436D-BFF0-B166E56532A8	0629EF87-AFB1-432C-86BE-995192C7ED81
TCGA-F7-A620	Stage III	M0	T3	NO	-17475	hnsc_tcga	Head and Neck Cancer	Head and Neck Squamous Cell Carcinoma	NA	13	139	NA	NA	47		Negative	NA	NOT HISPANIC OR LATINO	No Extranodal Extension	NA	2013-05-28			C01	YES	630	1971-03-01	C01.9	NO	0	NA	12	Modified Radical Neck Dissection	YES	NA	No	MX		TX	NX	N1	NA	G1	Head & Neck Squamous Cell Carcinoma	NO	TRUE	HNSC	B86E27D4-A524-4855-89C6-D46A4079A9A0	B707666D-A548-4A17-AD61-4150D887C2A5
TCGA-F7-A622	Stage III	M0	T3		-27456	hnsc_tcga	Head and Neck Cancer	Head and Neck Squamous Cell Carcinoma	1	13	125	NA	NA	75		Negative	NA	NOT HISPANIC OR LATINO		NA	2013-05-28			C32.9	YES	240	1971-03-01	C32.9	NO	0	NA	NA		NO	NA	No	MX		TX	NX	NX	2	G1	Head & Neck Squamous Cell Carcinoma	NO	TRUE	HNSC	9C128871-1026-46AB-9AE9-7C6AAC468B11	32056265-C5FB-4544-9F99-22B34FEBB805
TCGA-F7-A623	Stage IVA	M0	T1	NO	-25592	hnsc_tcga	Head and Neck Cancer	Head and Neck Squamous Cell Carcinoma	1	6	101	NA	NA	70		Negative	NA	NOT HISPANIC OR LATINO		NA	2013-05-28			C32.9	YES	800	1970-03-01	C32.9	NO	0	NA	6	Radical Neck Dissection	YES	NA	No	MX		TX	NX	N2b	2	G1	Head & Neck Squamous Cell Carcinoma	NO	TRUE	HNSC	FCB0C5E5-F63C-41B3-AE0E-3D1D6AAA66E4	5F14A8C0-F19E-4A67-B6DC-907196AB34F6
TCGA-F7-A624	Stage II	M0	T2	NO	-26667	hnsc_tcga	Head and Neck Cancer	Head and Neck Squamous Cell Carcinoma	1	0	154	NA	NA	73		Negative	NA	NOT HISPANIC OR LATINO		NA	2013-05-28			C06.0	YES	410	1970-03-01	C06.0	NO	0	NA	NA		NO	NA	No	MX		TX	NX	NX	1	G3	Head & Neck Squamous Cell Carcinoma	NO	TRUE	HNSC	46E51EB2-0C5E-457B-AF1A-8BAC1B8A8BEA	B4DD2008-D647-4AE3-B7A2-8BAF2BBFBBD9
TCGA-H7-7774	Stage IVA		T4a	NO	-27519	hnsc_tcga	Head and Neck Cancer	Head and Neck Squamous Cell Carcinoma	0	30	NA	NA	NA	75			NA	NOT HISPANIC OR LATINO	No Extranodal Extension	NA	2012-01-23			C14.8	YES	NA	1970-03-01	C14.8	NO	0	1	21			NA	No	M0	Stage III	T3	N0	N0	0	G2	Head & Neck Squamous Cell Carcinoma		NA	HNSC	eeae67ac-c9e0-468d-aad6-052501f7b982	50f6615a-49cc-4e14-b5dd-54784b66c27b
TCGA-H7-8502	Stage IVA	M0	T4a	YES	-18286	hnsc_tcga	Head and Neck Cancer	Head and Neck Squamous Cell Carcinoma	8	133	NA	NA	NA	50	YES	Positive	NA	NOT HISPANIC OR LATINO		NA	2012-08-21			C06.2	YES	NA	1971-03-01	C06.2	NO	0	1	40		YES	NA	No	M0	Stage IVA	T4a	N2b	N2b	7	G2	Head & Neck Squamous Cell Carcinoma	NO	NA	HNSC	ce603d46-299a-4ffb-84ab-b3b914a561b9	8844d186-222e-42db-8ad6-b7eb6270273e
TCGA-H7-A76A		MX	TX	YES	-20946	hnsc_tcga	Head and Neck Cancer	Head and Neck Squamous Cell Carcinoma	2	206	58	NA	NA	57	YES		NA	NOT HISPANIC OR LATINO		NA	2014-01-23		Positive	C09.9	YES	510	1971-03-01	C09.9	NO	0	NA	31		YES	NA	No	M0	Stage IVA	T2	N2b	N2b	5	G2	Head & Neck Squamous Cell Carcinoma	NO	FALSE	HNSC	59A7D695-CB0C-47B8-BA9D-CA52CA2CFA7D	78229167-1F08-416D-BE98-74F757610349
TCGA-HD-7229	Stage IVA		T4a		-22076	hnsc_tcga	Head and Neck Cancer	Head and Neck Squamous Cell Carcinoma	NA	2	NA	NA	NA	60			NA	NOT HISPANIC OR LATINO		NA	2011-10-05			C32.9	YES	NA	1970-03-01	C32.9	NO	0	1.3	NA			NA	No	M0	Stage IVA	T4a	NX	N0	NA	G3	Head & Neck Squamous Cell Carcinoma		NA	HNSC	5c48e21f-1fe9-4007-9b0c-7ca766586fff	1169973a-8575-4d2b-8da8-36a83aa5f947
TCGA-HD-7753	Stage I		T1	NO	-22774	hnsc_tcga	Head and Neck Cancer	Head and Neck Squamous Cell Carcinoma	4	5	NA	NA	NA	62		Positive	NA	NOT HISPANIC OR LATINO		NA	2012-03-09			C10.9	YES	NA	1970-03-01	C10.9	NO	0	0.5	NA		NO	NA	No	M0	Stage II	T2	N0	N0	7	G2	Head & Neck Squamous Cell Carcinoma		NA	HNSC	e8ac39e6-377a-412c-b18d-f6c4fc654ec6	e723f1bb-73a3-4d65-bd25-de76138515e9
TCGA-HD-7754	Stage IVA		T2	NO	-25365	hnsc_tcga	Head and Neck Cancer	Head and Neck Squamous Cell Carcinoma	4	25	NA	NA	NA	69		Positive	NA	NOT HISPANIC OR LATINO	Microscopic Extension	NA	2012-03-09			C10.9	YES	NA	1970-03-01	C10.9	NO	0	1	23	Radical Neck Dissection	YES	NA	No	M0	Stage IVA	T2	N2b	N2b	7	G1	Head & Neck Squamous Cell Carcinoma		NA	HNSC	10f53522-9ae7-47b9-80aa-b4b481561465	adb496a1-07eb-45b9-8690-00184143300e
TCGA-HD-7831	Stage IVA		T2	NO	-27334	hnsc_tcga	Head and Neck Cancer	Head and Neck Squamous Cell Carcinoma	0	0	NA	NA	NA	74		Negative	NA	NOT HISPANIC OR LATINO	No Extranodal Extension	NA	2012-03-09			C02.9	YES	NA	1970-03-01	C02.9	NO	0	0.6	21	Modified Radical Neck Dissection	YES	NA	No	M0	Stage III	T3	N0	N2	1	G2	Head & Neck Squamous Cell Carcinoma		NA	HNSC	0f718e17-86c1-4221-a878-d57ae87e744f	1e5dde33-0391-453f-baac-9ef83a8158f8
TCGA-HD-7832	Stage IVA		T4a	NO	-19192	hnsc_tcga	Head and Neck Cancer	Head and Neck Squamous Cell Carcinoma	6	0	NA	NA	NA	52		Negative	NA	NOT HISPANIC OR LATINO	No Extranodal Extension	NA	2012-03-09			C04.9	YES	NA	1970-03-01	C04.9	NO	0	0.3	35	Modified Radical Neck Dissection	YES	NA	No	M0	Stage IVA	T4a	N2	N0	7	G2	Head & Neck Squamous Cell Carcinoma		NA	HNSC	31e58fac-3ac3-4eeb-82d6-3f2b5cb8a60d	77995971-7b23-4672-998d-1e6c3b52c81f
TCGA-HD-8224	Stage IVA	M0	T3	YES	-23069	hnsc_tcga	Head and Neck Cancer	Head and Neck Squamous Cell Carcinoma	5	55	NA	NA	NA	63		Positive	NA	NOT HISPANIC OR LATINO	Gross Extension	NA	2012-06-13		Negative	C01	YES	NA	1970-03-01	C01.9	NO	0	0.9	57	Radical Neck Dissection	YES	NA	No	M0	Stage III	T3	N0	N2c	7	G3	Head & Neck Squamous Cell Carcinoma		NA	HNSC	43b99616-d7b4-404e-8912-4275f8d6dc55	0a1c832d-9a37-45ae-9357-efbcd32c7150
TCGA-HD-8314	Stage III		T1	YES	-21517	hnsc_tcga	Head and Neck Cancer	Head and Neck Squamous Cell Carcinoma	NA	44	NA	NA	NA	58	NO	Close	NA	NOT HISPANIC OR LATINO		NA	2012-08-09		Positive	C01	YES	NA	1983-03-01	C01.9	NO	0	1	44	Modified Radical Neck Dissection	YES	NA	No	M0	Stage III	T1	N1	N1	NA	G4	Head & Neck Squamous Cell Carcinoma Basaloid Type	NO	NA	HNSC	f1b7b418-80d2-4ddf-94cd-f79abba0a2a4	1712a6d6-d4ef-45b8-8093-f3266e5e6ead
TCGA-HD-8634	Stage I	MX	T1	NO	-18718	hnsc_tcga	Head and Neck Cancer	Head and Neck Squamous Cell Carcinoma	7	24	NA	NA	NA	51		Negative	NA	NOT HISPANIC OR LATINO	No Extranodal Extension	NA	2012-12-28			C02.9	YES	NA	1970-03-01	C02.9	NO	0	1.2	4		NO	NA	No	M0	Stage I	T1	NX	N0	7	G2	Head & Neck Squamous Cell Carcinoma	NO	NA	HNSC	22933e67-5c61-4c13-9772-5adb78785b34	7bddc733-9e3e-43da-9a19-492fc54c958f
TCGA-HD-8635	Stage III	MX	T1	NO	-22340	hnsc_tcga	Head and Neck Cancer	Head and Neck Squamous Cell Carcinoma	4	25	NA	NA	NA	61		Negative	NA	NOT HISPANIC OR LATINO	No Extranodal Extension	NA	2012-12-28		Negative	C02.9	YES	NA	1970-03-01	C02.9	NO	0	0.8	1		NO	NA	No	M0	Stage III	T1	N1	N1	1	G2	Head & Neck Squamous Cell Carcinoma	NO	NA	HNSC	b843df7e-db06-4d29-b00d-6a93effd9191	e5d8f8c3-a08d-4b63-bd8f-33e3c8e6406b
TCGA-HD-A4C1	Stage IVA	MX	T4a	NO	-15096	hnsc_tcga	Head and Neck Cancer	Head and Neck Squamous Cell Carcinoma	NA	11	67	NA	NA	41		Close	NA	NOT HISPANIC OR LATINO	No Extranodal Extension	NA	2013-01-25		Negative	C06.0	YES	70	1970-03-01	C06.0	NO	0	NA	42	Radical Neck Dissection	YES	NA	No	M0	Stage IVA	T3	N2	N2b	NA	G1	Head & Neck Squamous Cell Carcinoma	NO	FALSE	HNSC	765CC306-BDAE-4CAF-AD1E-35B8FE95C220	B9263FBF-5D23-44FC-9903-FF35FD8990A6
TCGA-HD-A633	Stage IVA	MX	T4a	NO	-27057	hnsc_tcga	Head and Neck Cancer	Head and Neck Squamous Cell Carcinoma	NA	49	105	NA	NA	74		Negative	NA	NOT HISPANIC OR LATINO	No Extranodal Extension	NA	2013-09-20			C06.9	YES	50	1971-03-01	C06.9	NO	0	NA	39	Modified Radical Neck Dissection	YES	NA	No	M0	Stage IVA	T4	N0	N0	NA	G2	Head & Neck Squamous Cell Carcinoma	NO	FALSE	HNSC	C0EDDE5E-D229-4061-8820-14AFC712C5B6	6AD70A8A-2D7E-406A-A419-B805B72EBA56
TCGA-HD-A6HZ	Stage III	MX	T2	YES	-29045	hnsc_tcga	Head and Neck Cancer	Head and Neck Squamous Cell Carcinoma	NA	111	167	NA	NA	79		Close	NA	NOT HISPANIC OR LATINO	No Extranodal Extension	NA	2013-09-20			C02.9	YES	60	1970-03-01	C02.9	NO	0	NA	11	Modified Radical Neck Dissection	YES	NA	No	M0	Stage II	T2	N0	N1	NA	G2	Head & Neck Squamous Cell Carcinoma	NO	FALSE	HNSC	9205DC07-93F5-4B5E-924E-8E097616160F	A623A7B2-FEE2-4080-8E17-118BCBB7FEBF
TCGA-HD-A6I0	Stage IVA	MX	T4a	NO	-20491	hnsc_tcga	Head and Neck Cancer	Head and Neck Squamous Cell Carcinoma	4	33	105	NA	NA	56		Negative	NA	NOT HISPANIC OR LATINO	No Extranodal Extension	NA	2013-09-20			C06.9	YES	40	1971-03-01	C06.9	NO	0	NA	50	Modified Radical Neck Dissection	YES	NA	No	M0	Stage III	T3	NX	N1	7	G1	Head & Neck Squamous Cell Carcinoma	NO	FALSE	HNSC	DEC3C21B-3F59-472F-8573-27B0E830AA92	EDA02789-DEBF-496C-919F-16A4F96F8307
TCGA-HL-7533					-23950	hnsc_tcga	Head and Neck Cancer	Head and Neck Squamous Cell Carcinoma	2.5	692	NA	NA	NA	65			NA	NOT HISPANIC OR LATINO		NA	2012-05-25	Positive		C14.8	YES	NA	1970-03-01	C14.8	NO	0	1.2	NA		NO	NA	No	M0	Stage IVA	T2	N2b		2.5	G3	Head & Neck Squamous Cell Carcinoma		NA	HNSC	9d469689-0413-4898-aa83-c6756cbfe117	3ca6bb6b-a9ef-4d8f-bdbe-a01567a60251
TCGA-IQ-7630	Stage II	M0	T2	NO	-18131	hnsc_tcga	Head and Neck Cancer	Head and Neck Squamous Cell Carcinoma	NA	160	NA	NA	NA	49		Negative	NA	HISPANIC OR LATINO		NA	2011-12-13			C10.9	YES	NA	1970-03-01	C10.9	NO	0	NA	27	Modified Radical Neck Dissection	YES	NA	No	M0	Stage III	T3	N0	N0	NA	G3	Head & Neck Squamous Cell Carcinoma		NA	HNSC	ebd1be2c-35ca-45c0-9aba-9baf432114c1	d81234fd-4e10-469a-81e6-f23a192f1ef1
TCGA-IQ-7631	Stage II		T2	NO	-22151	hnsc_tcga	Head and Neck Cancer	Head and Neck Squamous Cell Carcinoma	NA	122	NA	NA	NA	60		Negative	NA	NOT HISPANIC OR LATINO		NA	2011-12-13			C06.0	YES	NA	1970-03-01	C06.0	NO	0	NA	48	Modified Radical Neck Dissection	YES	NA	No	M0	Stage II	T2	N0	N0	NA	G1	Head & Neck Squamous Cell Carcinoma		NA	HNSC	d8a6383e-3320-4d2c-9017-31e8e1e8f120	e106cb26-d4f7-4dd3-889f-c1fc35167d3d
TCGA-IQ-7632	Stage IVA	M0	T4a		-24986	hnsc_tcga	Head and Neck Cancer	Head and Neck Squamous Cell Carcinoma	NA	113	NA	NA	NA	68		Negative	NA	NOT HISPANIC OR LATINO		NA	2011-12-13			C14.8	YES	NA	1970-03-01	C14.8	NO	0	NA	30	Modified Radical Neck Dissection	YES	NA	No	M0	Stage IVA	T4a	N0	N0	NA	G1	Head & Neck Squamous Cell Carcinoma		NA	HNSC	601a4146-8093-4f20-9a0a-a97916c9e7f6	cd989471-a9cf-4fad-a321-c01764bb85d7
TCGA-IQ-A61E	Stage III	MX	T3	NO	-20417	hnsc_tcga	Head and Neck Cancer	Head and Neck Squamous Cell Carcinoma	3	588	490	NA	NA	55	YES	Close	NA	NOT HISPANIC OR LATINO		NA	2013-07-22			C02.9	YES	130	1970-03-01	C02.9	NO	0	NA	44	Functional (Limited) Neck Dissection	YES	NA	No	MX	Stage III	T3	N0	N0	7	G2	Head & Neck Squamous Cell Carcinoma	NO	TRUE	HNSC	D3F786A6-5D72-4D6E-85FD-0C6ADE9F6E95	D9069E24-2F26-420C-BDF0-37E7529D1F48
TCGA-IQ-A61G	Stage IVA	MX	T4a	NO	-21066	hnsc_tcga	Head and Neck Cancer	Head and Neck Squamous Cell Carcinoma	NA	360	405	NA	NA	57	YES	Negative	NA	HISPANIC OR LATINO	Gross Extension	NA	2013-08-01			C04.9	YES	30	1971-03-01	C04.9	NO	0	NA	39	Modified Radical Neck Dissection	YES	NA	No	MX	Stage IVA	T4a	N2c	N2c	NA	G2	Head & Neck Squamous Cell Carcinoma	YES	TRUE	HNSC	C512BA69-7B90-4334-92EB-48AB91AA05F2	2A3D47F1-52EB-4669-AE44-FB511B34D17E
TCGA-IQ-A61H	Stage II	MX	T2	NO	-27990	hnsc_tcga	Head and Neck Cancer	Head and Neck Squamous Cell Carcinoma	NA	412	418	NA	NA	76	NO	Negative	NA	HISPANIC OR LATINO		NA	2013-07-22			C02.9	YES	140	1971-03-01	C02.9	NO	0	NA	53	Radical Neck Dissection	YES	NA	No	MX	Stage II	T2	N0	N0	NA	G2	Head & Neck Squamous Cell Carcinoma	NO	TRUE	HNSC	90D21B9B-DBB8-43A6-9817-67ED69FABDC0	5B6333B9-9BAE-4CE9-9248-15E0DB5D1B28
TCGA-IQ-A61I	Stage IVA	M0	T1	YES	-23035	hnsc_tcga	Head and Neck Cancer	Head and Neck Squamous Cell Carcinoma	NA	NA	352	NA	2	63	NO	Negative	NA	NOT HISPANIC OR LATINO	No Extranodal Extension	NA	2013-07-26			C09.9	YES	100	1972-03-01	C09.9	NO	0	NA	41	Modified Radical Neck Dissection	YES	NA	No	M0	Stage IVA	T1	N2a	N2b	NA	G3	Head & Neck Squamous Cell Carcinoma	NO	TRUE	HNSC	B9AAC2A5-5CA9-4F57-BA02-B53904256467	19C823D3-C15B-4A1C-9A27-6CE489F3B640
TCGA-IQ-A61J	Stage IVA	M0	T2	NO	-19913	hnsc_tcga	Head and Neck Cancer	Head and Neck Squamous Cell Carcinoma	NA	440	344	NA	NA	54	YES	Negative	NA	NOT HISPANIC OR LATINO	No Extranodal Extension	NA	2013-07-26			C02.9	YES	70	1971-03-01	C02.9	NO	0	NA	73	Modified Radical Neck Dissection	YES	NA	No	M0	Stage IVA	T2	N2b	N2b	NA	G1	Head & Neck Squamous Cell Carcinoma	NO	TRUE	HNSC	D69E29CA-24BE-4F35-A581-F82E624B8E8B	B2382010-122D-4A62-A55F-62810B34BA1E
TCGA-IQ-A6SG	Stage III	M0	T3		-22529	hnsc_tcga	Head and Neck Cancer	Head and Neck Squamous Cell Carcinoma	NA	579	26	NA	NA	61		Negative	NA	HISPANIC OR LATINO		NA	2015-03-27			C02.9	YES	200	1971-03-01	C02.9	NO	0	NA	71	Functional (Limited) Neck Dissection	YES	NA	No	M0	Stage III	T3	N0	N0	NA	G2	Head & Neck Squamous Cell Carcinoma	NO	TRUE	HNSC	C2F1B2D5-1302-4E29-8889-37BA34E91DE2	130B95C1-EA0A-4EC0-A1DF-025F8C47A36F
TCGA-IQ-A6SH	Stage III	M0	T2	NO	-20109	hnsc_tcga	Head and Neck Cancer	Head and Neck Squamous Cell Carcinoma	NA	471	51	NA	NA	55		Negative	NA	NOT HISPANIC OR LATINO	Microscopic Extension	NA	2015-03-27			C02.9	YES	410	1970-03-01	C02.9	NO	0	NA	49	Radical Neck Dissection	YES	NA	No	M1	Stage IVC	T2	N1	N1	NA	G1	Head & Neck Squamous Cell Carcinoma	NO	TRUE	HNSC	573E3713-781F-447E-9F4D-A7FAAE4A4F03	5981486E-22B4-48B5-A5B8-3DD2ADBEDF84
TCGA-KU-A66S	Stage III	MX	T1	YES	-25454	hnsc_tcga	Head and Neck Cancer	Head and Neck Squamous Cell Carcinoma	NA	224	150	NA	NA	69	YES	Positive	NA	NOT HISPANIC OR LATINO	Microscopic Extension	NA	2013-06-27			C32.9	YES	600	1983-03-01	C32.9	NO	0	NA	7	Functional (Limited) Neck Dissection	YES	NA	No	MX	Stage III	T2	N1	N1	NA	G2	Head & Neck Squamous Cell Carcinoma Basaloid Type	NO	TRUE	HNSC	5ED1B22D-99CA-4C21-B5D4-851E4A6217E9	A590A632-55B4-4BE6-B2D8-6C8AFBBE99AC
TCGA-KU-A66T	Stage IVA	MX	T4	NO	-19405	hnsc_tcga	Head and Neck Cancer	Head and Neck Squamous Cell Carcinoma	NA	210	197	NA	NA	53	YES	Negative	NA	NOT HISPANIC OR LATINO	No Extranodal Extension	NA	2013-06-27			C04.9	YES	210	1971-03-01	C04.9	NO	0	NA	24	Modified Radical Neck Dissection	YES	NA	No	M0	Stage IVA	T4	N0	N0	NA	G2	Head & Neck Squamous Cell Carcinoma	NO	TRUE	HNSC	27392405-1365-49E6-8AFE-7C18946AB06E	285FF3F6-4E7B-49A6-8239-8C79C2D8661C
TCGA-KU-A6H7	Stage IVA	M0	T2	YES	-20314	hnsc_tcga	Head and Neck Cancer	Head and Neck Squamous Cell Carcinoma	1	146	NA	NA	NA	55	YES	Positive	NA	NOT HISPANIC OR LATINO	Microscopic Extension	NA	2013-09-25		Positive	C09.9	YES	NA	1970-03-01	C09.9		0	NA	23	Functional (Limited) Neck Dissection	YES	NA	No	M0	Stage IVA	T2	N2a	N2a	1	G2	Head & Neck Squamous Cell Carcinoma	NO	NA	HNSC	ABBCC1D8-AB74-4459-BF28-CC627BEF440E
TCGA-KU-A6H8	Stage IVA	M0	T2	YES	-15066	hnsc_tcga	Head and Neck Cancer	Head and Neck Squamous Cell Carcinoma	2	168	47	NA	NA	41	YES	Negative	NA	NOT HISPANIC OR LATINO	Microscopic Extension	NA	2013-09-25			C02.9	YES	640	1970-03-01	C02.9	NO	0	NA	16	Functional (Limited) Neck Dissection	YES	NA	No	M0	Stage I	T1	N0	N2b	1	G3	Head & Neck Squamous Cell Carcinoma	YES	TRUE	HNSC	9BF40EEB-9A87-44A2-A782-197AB954C937	16DC5C13-5D5F-4C89-B8D5-0D8F856375C8
TCGA-MT-A51W	Stage I	M0	T1	NO	-19098	hnsc_tcga	Head and Neck Cancer	Head and Neck Squamous Cell Carcinoma	7	14	49	NA	NA	52	NO	Negative	NA	NOT HISPANIC OR LATINO	No Extranodal Extension	NA	2012-09-28	Negative	Negative	C02.9	YES	130	1970-03-01	C02.9	NO	0	NA	NA		NO	NA	No	M0	Stage I	T1	NX	N0	4	G2	Head & Neck Squamous Cell Carcinoma	NO	TRUE	HNSC	6EA380AD-D73D-41B2-B448-2D224DEEC01B	91E56A17-B4E8-4EF7-B587-A83BCD8C062D
TCGA-MT-A51X	Stage IVA	M0	T1	YES	-10976	hnsc_tcga	Head and Neck Cancer	Head and Neck Squamous Cell Carcinoma	NA	34	77	NA	NA	30	NO	Negative	NA	NOT HISPANIC OR LATINO	Microscopic Extension	NA	2012-09-28			C02.9	YES	140	1971-03-01	C02.9	NO	0	NA	35	Modified Radical Neck Dissection	YES	NA	No	M0	Stage IVA	T1	N2b	N2b	NA	G1	Head & Neck Squamous Cell Carcinoma	NO	TRUE	HNSC	375E4B96-49DA-4F65-9878-29F56FDA9C2E	3522CC18-6173-4AF6-B8A3-20D79D3E499A
TCGA-MT-A67A	Stage I	MX	T1	NO	-31161	hnsc_tcga	Head and Neck Cancer	Head and Neck Squamous Cell Carcinoma	0	392	541	NA	NA	85	NO	Positive	NA	NOT HISPANIC OR LATINO	No Extranodal Extension	NA	2013-05-21			C02.9	YES	50	1970-03-01	C02.9	NO	0	NA	20	Functional (Limited) Neck Dissection	YES	NA	No	M0	Stage I	T1	N0	N0	0	G2	Head & Neck Squamous Cell Carcinoma	NO	FALSE	HNSC	EDA7DF86-A344-4790-88AC-E1391F07F66D	AC9D779A-EFC8-4B69-A0B1-AB1D7F83E3F4
TCGA-MT-A67D	Stage II	M0	T2	NO	-20386	hnsc_tcga	Head and Neck Cancer	Head and Neck Squamous Cell Carcinoma	0	56	313	NA	NA	55	NO	Negative	NA	NOT HISPANIC OR LATINO	No Extranodal Extension	NA	2013-05-21			C04.0	YES	180	1971-03-01	C04.0	NO	0	NA	23	Functional (Limited) Neck Dissection	YES	NA	No	M0	Stage II	T2	N0	N0	3	G2	Head & Neck Squamous Cell Carcinoma	NO	TRUE	HNSC	11C944FC-9A49-4C00-AB8C-DA5DFD595244	FB62CABB-A53E-4391-9B08-35A7DB178732
TCGA-MT-A67F	Stage IVA	MX	T4	NO	-22057	hnsc_tcga	Head and Neck Cancer	Head and Neck Squamous Cell Carcinoma	0	111	173	NA	NA	60	NO	Negative	NA	NOT HISPANIC OR LATINO	No Extranodal Extension	NA	2013-05-21			C06.9	YES	110	1971-03-01	C06.9	NO	0	NA	64	Functional (Limited) Neck Dissection	YES	NA	No	MX	Stage IVA	T4	N0	N0	0	G2	Head & Neck Squamous Cell Carcinoma	NO	TRUE	HNSC	50EE088A-5F74-466A-B9E7-7247F0A8D3E8	8735F6F0-30D5-42C1-9D0B-849484840017
TCGA-MT-A7BN	Stage IVA			YES	-27162	hnsc_tcga	Head and Neck Cancer	Head and Neck Squamous Cell Carcinoma	0	51	101	NA	NA	74	NO	Negative	NA		No Extranodal Extension	NA	2013-07-24			C04.9	YES	140	1970-03-01	C04.9	NO	0	NA	19	Radical Neck Dissection	YES	NA	No	M0	Stage IVA	T2	N2b		0	G3	Head & Neck Squamous Cell Carcinoma	NO	TRUE	HNSC	C060BDAB-DCE7-46B9-801C-48DFAB4FAD92	7E9A7F4D-0692-40E3-A4F5-6C65BEC7D768
TCGA-MZ-A6I9					-24939	hnsc_tcga	Head and Neck Cancer	Head and Neck Squamous Cell Carcinoma	2	254	156	NA	NA	68	NO		NA	NOT HISPANIC OR LATINO		NA	2013-09-12		Positive	C10.9	YES	60	1970-03-01	C10.9	NO	0	NA	NA		NO	NA	No	M0	Stage IVA	T4a	N2b		7	G2	Head & Neck Squamous Cell Carcinoma	YES	TRUE	HNSC	AAD9A83A-AB62-47B0-990C-527CCDB58D63	396F116A-BEDE-472E-847D-435A77DFA7DC
TCGA-P3-A5Q5	Stage IVA	MX	T2		-19728	hnsc_tcga	Head and Neck Cancer	Head and Neck Squamous Cell Carcinoma	NA	910	3207	NA	NA	54	YES	Positive	NA	NOT HISPANIC OR LATINO	Gross Extension	NA	2013-06-04			C09.9	YES	30	1983-03-01	C09.9	NO	0	NA	NA	Modified Radical Neck Dissection	YES	NA	No	M0	Stage IVA	TX	N2	N2	NA	G3	Head & Neck Squamous Cell Carcinoma Basaloid Type	NO	TRUE	HNSC	3A867DF4-D548-4408-A90B-441DED53B7B6	3F5CD265-0DD3-40C3-94B8-E92D18CE87B0
TCGA-P3-A5Q6	Stage IVA	MX	T4a		-17917	hnsc_tcga	Head and Neck Cancer	Head and Neck Squamous Cell Carcinoma	NA	NA	2922	NA	480	49	YES	Positive	NA	NOT HISPANIC OR LATINO	Gross Extension	NA	2013-06-04			C09.9	YES	10	1970-03-01	C09.9	NO	0	NA	35	Modified Radical Neck Dissection	YES	NA	No	M0	Stage III	T3	N0	N2b	NA	G3	Head & Neck Squamous Cell Carcinoma	YES	TRUE	HNSC	451E4916-80EE-45F8-AD70-84340868A5A9	B929BF9B-34A0-4FA3-9BD5-49F8097C573E
TCGA-P3-A5QA	Stage I	MX	T1	NO	-15125	hnsc_tcga	Head and Neck Cancer	Head and Neck Squamous Cell Carcinoma	NA	1652	1596	NA	NA	41	YES	Negative	NA			NA	2013-06-04			C02.9	YES	20	1970-03-01	C02.9	NO	0	NA	NA		NO	NA	No	M0	Stage II	T2	N0	NX	NA	G3	Head & Neck Squamous Cell Carcinoma	YES	TRUE	HNSC	80D51546-C046-4AF4-B3B3-B6BF5B1EAB02	A21A6311-A17E-4F12-99F3-875C9154ADD0
TCGA-P3-A5QE	Stage III	MX	T2		-18002	hnsc_tcga	Head and Neck Cancer	Head and Neck Squamous Cell Carcinoma	NA	721	1217	NA	NA	49	YES	Close	NA	NOT HISPANIC OR LATINO	No Extranodal Extension	NA	2013-06-04			C01	YES	20	1983-03-01	C01.9	NO	0	NA	17	Functional (Limited) Neck Dissection	YES	NA	No	M0	Stage III	T1	N1	N1	NA	G2	Head & Neck Squamous Cell Carcinoma Basaloid Type	NO	TRUE	HNSC	387DB1DF-EBAA-41C2-B036-F46AD61E313A	B497FC94-D8FF-4D20-A46A-F531724823DD
TCGA-P3-A5QF	Stage IVA	MX	T4	YES	-18035	hnsc_tcga	Head and Neck Cancer	Head and Neck Squamous Cell Carcinoma	NA	NA	1200	NA	330	49	YES	Positive	NA	NOT HISPANIC OR LATINO	Microscopic Extension	NA	2013-06-04			C03.0	YES	20	1970-03-01	C03.0	NO	0	NA	41	Functional (Limited) Neck Dissection	YES	NA	No	M0	Stage IVA	T4	N2b	N2b	NA	G2	Head & Neck Squamous Cell Carcinoma	YES	TRUE	HNSC	4587AE9F-71FB-4582-82FF-FB407FEE6445	D30D7D4C-0ACF-4B61-9D7E-2C15E20D73A8
TCGA-P3-A6SW	Stage IVB	MX	T3		-18536	hnsc_tcga	Head and Neck Cancer	Head and Neck Squamous Cell Carcinoma	1	1120	3039	NA	NA	50	YES	Close	NA	NOT HISPANIC OR LATINO	Gross Extension	NA	2013-10-21			C09.9	YES	40	1970-03-01	C09.9	NO	0	NA	NA	Modified Radical Neck Dissection	YES	NA	No	M0	Stage IVA	T4	N2b	N3	3	G3	Head & Neck Squamous Cell Carcinoma Basaloid Type	NO	TRUE	HNSC	3A2FE6DA-5F3C-4AD8-B735-23ADFFE3FD6B	DC6D258A-DBA3-4186-BF89-9EFB70A32365
TCGA-P3-A6SX	Stage III	MX	T2	YES	-24715	hnsc_tcga	Head and Neck Cancer	Head and Neck Squamous Cell Carcinoma	NA	NA	2855	NA	1430	67	YES	Close	NA	NOT HISPANIC OR LATINO	No Extranodal Extension	NA	2013-10-21			C09.9	YES	50	1970-03-01	C09.9	NO	0	NA	30	Functional (Limited) Neck Dissection	YES	NA	No	M0	Stage IVA	T4	N0	N1	NA	G2	Head & Neck Squamous Cell Carcinoma	NO	TRUE	HNSC	220D75AE-C94B-473A-A988-AC40C15FA219	CC710F34-9FB5-4474-84DF-5427B59AA062
TCGA-P3-A6T0	Stage IVA	MX	T4a		-17259	hnsc_tcga	Head and Neck Cancer	Head and Neck Squamous Cell Carcinoma	NA	578	2368	NA	NA	47	YES	Negative	NA	NOT HISPANIC OR LATINO	No Extranodal Extension	NA	2013-10-21			C04.9	YES	80	1970-03-01	C04.9	NO	0	NA	18	Functional (Limited) Neck Dissection	YES	NA	No	M0	Stage IVA	T4	N2b	N0	NA	G2	Head & Neck Squamous Cell Carcinoma	YES	TRUE	HNSC	E3121DDE-EEE2-4975-A135-BDB89434A7E2	7F1B1326-9AF8-47B1-B2A1-0A680D62426C
TCGA-P3-A6T2	Stage IVA	MX	T3		-16588	hnsc_tcga	Head and Neck Cancer	Head and Neck Squamous Cell Carcinoma	4	1917	1912	NA	NA	45	YES	Positive	NA	NOT HISPANIC OR LATINO	No Extranodal Extension	NA	2013-10-21			C06.0	YES	30	1970-03-01	C06.0	NO	0	NA	42	Functional (Limited) Neck Dissection	YES	NA	No	M0	Stage II	T2	N0	N2b	4	G2	Head & Neck Squamous Cell Carcinoma	NO	TRUE	HNSC	A563109D-0990-4BDC-8BD7-6766D1EADBDC	906D57C3-26E7-45F6-BE6F-A8BABC20403A
TCGA-P3-A6T3	Stage IVA	MX	T3	NO	-18143	hnsc_tcga	Head and Neck Cancer	Head and Neck Squamous Cell Carcinoma	NA	NA	1698	NA	577	49	YES	Positive	NA	NOT HISPANIC OR LATINO		NA	2013-10-21			C06.9	YES	90	1971-03-01	C06.9	NO	0	NA	30	Functional (Limited) Neck Dissection	YES	NA	No	M0	Stage IVA	T4	N1	N2	NA	G2	Head & Neck Squamous Cell Carcinoma	YES	TRUE	HNSC	13E936FF-81F0-49B9-BC2E-2EA43921F450	46D87524-1F2A-4CFC-97A9-1A213E1498DD
TCGA-P3-A6T4	Stage IVA	MX	T4a	YES	-20027	hnsc_tcga	Head and Neck Cancer	Head and Neck Squamous Cell Carcinoma	3.5	NA	1668	NA	62	54	NO	Positive	NA	NOT HISPANIC OR LATINO		NA	2013-10-21			C04.9	YES	80	1971-03-01	C04.9	NO	0	NA	14	Functional (Limited) Neck Dissection	YES	NA	No	M0	Stage IVA	T4	N1	N1	7	G2	Head & Neck Squamous Cell Carcinoma	NO	TRUE	HNSC	C7885E34-D5DC-4256-A4AD-944A27DFCFC2	2DD14F46-9B9E-4A1A-B678-CC601FBB9519
TCGA-P3-A6T5	Stage IVA	MX	T4a		-28977	hnsc_tcga	Head and Neck Cancer	Head and Neck Squamous Cell Carcinoma	NA	NA	1364	NA	882	79	NO	Close	NA	NOT HISPANIC OR LATINO	No Extranodal Extension	NA	2013-10-21			C03.1	YES	40	1970-03-01	C03.1	NO	0	NA	29	Functional (Limited) Neck Dissection	YES	NA	No	M0	Stage IVA	T4	N0	N0	NA	G2	Head & Neck Squamous Cell Carcinoma	YES	TRUE	HNSC	46625EBD-5BF3-4FE7-BF3F-19CC5A210555	E45C81DC-4143-4E97-8212-85032C760221
TCGA-P3-A6T6	Stage IVA	MX	T4a	YES	-19694	hnsc_tcga	Head and Neck Cancer	Head and Neck Squamous Cell Carcinoma	1	NA	1333	NA	395	53	YES	Positive	NA	NOT HISPANIC OR LATINO		NA	2013-10-21			C03.1	YES	50	1970-03-01	C03.1	NO	0	NA	NA		NO	NA	No	M0	Stage IVA	T4	N0	NX	7	G3	Head & Neck Squamous Cell Carcinoma	YES	TRUE	HNSC	91D44093-D8D9-442C-92ED-E659C45B4E0A	127B2222-93B1-4870-93F2-867D8E69D015
TCGA-P3-A6T7	Stage IVA	MX	T3	YES	-20301	hnsc_tcga	Head and Neck Cancer	Head and Neck Squamous Cell Carcinoma	6	NA	1182	NA	487	55	YES	Close	NA	NOT HISPANIC OR LATINO	Microscopic Extension	NA	2013-10-21			C04.9	YES	60	1970-03-01	C04.9	NO	0	NA	47	Functional (Limited) Neck Dissection	YES	NA	No	M0	Stage III	T3	N1	N2b	7	G2	Head & Neck Squamous Cell Carcinoma		TRUE	HNSC	7CB42865-AF55-487D-B604-FAACE62BBA51	38441983-EDB2-4DD9-BDC0-22D7E53048E8
TCGA-P3-A6T8	Stage IVA	MX	T4a	YES	-19754	hnsc_tcga	Head and Neck Cancer	Head and Neck Squamous Cell Carcinoma	5	400	1060	NA	NA	54	YES	Positive	NA	NOT HISPANIC OR LATINO	No Extranodal Extension	NA	2013-10-21			C04.9	YES	60	1970-03-01	C04.9	NO	0	NA	34	Functional (Limited) Neck Dissection	YES	NA	No	M0	Stage IVA	T4a	N0	N2	7	G3	Head & Neck Squamous Cell Carcinoma	NO	TRUE	HNSC	8F1B904E-39A7-4870-B0F4-EFA1D43E50A8	357E6685-FEFE-4A93-AA9B-367B169CDB96
TCGA-QK-A64Z	Stage IVA	MX	T4	NO	-29037	hnsc_tcga	Head and Neck Cancer	Head and Neck Squamous Cell Carcinoma	0	553	555	NA	NA	79	NO	Close	NA	NOT HISPANIC OR LATINO		NA	2013-09-04			C04.9	YES	80	1970-03-01	C04.9	NO	0	NA	NA		NO	NA	No	M0	Stage II	T2	N0	NX	0	G1	Head & Neck Squamous Cell Carcinoma	YES	FALSE	HNSC	2915B26B-8C18-48E4-9715-A7E207F0A0E6	67289D96-8140-4BA1-9863-124950488C1D
TCGA-QK-A652	Stage III	MX	T1	YES	-22023	hnsc_tcga	Head and Neck Cancer	Head and Neck Squamous Cell Carcinoma	1	259	35	NA	NA	60	YES	Negative	NA	NOT HISPANIC OR LATINO	No Extranodal Extension	NA	2013-09-04			C02.9	YES	270	1970-03-01	C02.9	NO	0	NA	39	Functional (Limited) Neck Dissection	YES	NA	No	M0	Stage II	T2	N0	N1	1	G2	Head & Neck Squamous Cell Carcinoma	NO	FALSE	HNSC	49EB77F3-F7D8-4E98-9F91-547543028877	EF423DF0-4732-48B1-88E3-EEB7CF1A711A
TCGA-QK-A6IG	Stage III	M0	T2	YES	-25334	hnsc_tcga	Head and Neck Cancer	Head and Neck Squamous Cell Carcinoma	NA	218	45	NA	NA	69	YES	Negative	NA	NOT HISPANIC OR LATINO	Microscopic Extension	NA	2013-09-24			C06.0	YES	100	1970-03-01	C06.0	NO	0	NA	22	Modified Radical Neck Dissection	YES	NA	No	M0	Stage II	T2	N0	N1	NA	G2	Head & Neck Squamous Cell Carcinoma	YES	FALSE	HNSC	3203D0AE-5FE9-4FF2-BE0A-1D97F7684819	ECFA2AFF-9EBC-4246-8EE0-DEF546A024EF
TCGA-QK-A6IH	Stage IVB	M0	T4b	YES	-23936	hnsc_tcga	Head and Neck Cancer	Head and Neck Squamous Cell Carcinoma	NA	228	38	NA	NA	65	YES	Close	NA	NOT HISPANIC OR LATINO	Microscopic Extension	NA	2013-09-24			C03.9	YES	60	1970-03-01	C03.9	NO	0	NA	32	Modified Radical Neck Dissection	YES	NA	No	M0	Stage IVA	T4a	N1	N2b	NA	G2	Head & Neck Squamous Cell Carcinoma	YES	FALSE	HNSC	C1F286F6-D4A1-494A-88C8-FF8E2A3DF2CE	0D0194EB-D83F-4028-9B4B-3308C0207133
TCGA-QK-A6II	Stage IVA	M0	T4a	NO	-19113	hnsc_tcga	Head and Neck Cancer	Head and Neck Squamous Cell Carcinoma	NA	225	31	NA	NA	52	YES	Negative	NA	NOT HISPANIC OR LATINO	Microscopic Extension	NA	2013-09-25			C04.9	YES	420	1970-03-01	C04.9	NO	0	NA	58	Modified Radical Neck Dissection	YES	NA	No	M0	Stage III	T3	N0	N2c	7	G2	Head & Neck Squamous Cell Carcinoma	YES	FALSE	HNSC	3AEA4CF5-ADE6-4747-B1D1-C431564F5FA6	80ED0EFE-876C-4F58-AC25-9DE2F53D40A3
TCGA-QK-A6IJ	Stage III	M0	T2	NO	-25966	hnsc_tcga	Head and Neck Cancer	Head and Neck Squamous Cell Carcinoma	NA	64	17	NA	NA	71	NO	Negative	NA	NOT HISPANIC OR LATINO	No Extranodal Extension	NA	2013-09-25	Negative		C04.9	YES	60	1970-03-01	C04.9	NO	0	NA	40	Modified Radical Neck Dissection	YES	NA	No	M0	Stage II	T2	N0	N1	NA	G3	Head & Neck Squamous Cell Carcinoma		FALSE	HNSC	BDC0A7F5-D0F9-4008-BF4C-51E570CA1EBC	0AB45E4F-912E-49A4-A428-B7220937FC54
TCGA-QK-A6V9	Stage II	M0	T2	NO	-20461	hnsc_tcga	Head and Neck Cancer	Head and Neck Squamous Cell Carcinoma	NA	567	478	NA	NA	56	NO	Negative	NA	NOT HISPANIC OR LATINO	No Extranodal Extension	NA	2013-12-06	Positive	Positive	C10.9	YES	30	1970-03-01	C10.9	NO	0	NA	NA		NO	NA	No	M0	Stage II	T2	N0	NX	NA	G2	Head & Neck Squamous Cell Carcinoma	NO	TRUE	HNSC	DCB27E14-14EF-42B2-B9A6-7E26C5AFA869	9B60705B-95C4-4079-A907-E4A4B65A3CF4
TCGA-QK-A6VB	Stage IVA	M0	T4a	NO	-24144	hnsc_tcga	Head and Neck Cancer	Head and Neck Squamous Cell Carcinoma	NA	156	25	NA	NA	66	YES	Negative	NA	NOT HISPANIC OR LATINO	No Extranodal Extension	NA	2013-12-06			C04.9	YES	170	1970-03-01	C04.9	NO	0	NA	40	Functional (Limited) Neck Dissection	YES	NA	No	M0	Stage IVA	T4a	N0	N0	NA	G2	Head & Neck Squamous Cell Carcinoma	NO	TRUE	HNSC	63D646E2-60AA-4BD5-B2ED-6254C9C51BE4	13E8E859-D5BA-4576-AE4B-FB9C66B5D706
TCGA-QK-A6VC	Stage IVA	M0	T4a	NO	-22865	hnsc_tcga	Head and Neck Cancer	Head and Neck Squamous Cell Carcinoma	NA	106	24	NA	NA	62	YES	Close	NA	NOT HISPANIC OR LATINO	No Extranodal Extension	NA	2013-12-06	Negative		C13.9	YES	210	1970-03-01	C13.9	NO	0	NA	67	Functional (Limited) Neck Dissection	YES	NA	No	M0	Stage IVA	T4a	N2c	N1	NA	G2	Head & Neck Squamous Cell Carcinoma	NO	TRUE	HNSC	3E49A2B8-9B2C-4D15-9773-24DF8B4AB2FD	76240522-A39E-48C7-80E0-241277FDB705
TCGA-QK-A8Z8	Stage IVC	M1	T3		-22107	hnsc_tcga	Head and Neck Cancer	Head and Neck Squamous Cell Carcinoma	12	NA	50	NA	171	60	NO		NA	NOT HISPANIC OR LATINO		NA	2014-04-14			C32.9	YES	80	1970-03-01	C32.9	NO	0	NA	NA		NO	NA	No	M1	Stage IVC	T3	N1	N1	7	G2	Head & Neck Squamous Cell Carcinoma		TRUE	HNSC	AC511727-185B-4AC0-B6C0-DC3A79657BE6	A118DA56-784D-4B67-AADE-D9A7A8B49F18
TCGA-QK-A8Z9	Stage IVA	M0	T4a	YES	-20471	hnsc_tcga	Head and Neck Cancer	Head and Neck Squamous Cell Carcinoma	NA	149	44	NA	NA	56	YES	Negative	NA	NOT HISPANIC OR LATINO	Microscopic Extension	NA	2014-04-14			C04.9	YES	110	1970-03-01	C04.9	NO	0	NA	82	Modified Radical Neck Dissection	YES	NA	No	M0	Stage IVA	T4a	N2b	N2b	NA	G2	Head & Neck Squamous Cell Carcinoma	NO	TRUE	HNSC	8980FB06-E38D-459F-A777-52048D492DEF	8C5FA658-989B-4618-A9C5-38ECB47E59DC
TCGA-QK-A8ZA		MX	T2		-21979	hnsc_tcga	Head and Neck Cancer	Head and Neck Squamous Cell Carcinoma	3	135	35	NA	NA	60	YES		NA	NOT HISPANIC OR LATINO		NA	2014-04-14		Positive	C10.9	YES	30	1970-03-01	C10.9	NO	0	NA	NA		NO	NA	No	MX	Stage IVA	T2	N2b	N2b	7	G2	Head & Neck Squamous Cell Carcinoma		TRUE	HNSC	86A5C819-49E9-4B06-B43D-0F0C06A935FD	9ADFBC71-DA3C-4A8E-A72F-76690E90A8CA
TCGA-QK-A8ZB	Stage IVA	M0	T4a	NO	-25192	hnsc_tcga	Head and Neck Cancer	Head and Neck Squamous Cell Carcinoma	0	135	30	NA	NA	68	YES	Negative	NA	NOT HISPANIC OR LATINO	No Extranodal Extension	NA	2014-04-14			C32.9	YES	200	1970-03-01	C32.9	NO	0	NA	81	Modified Radical Neck Dissection	YES	NA	No	M0	Stage IVA	T4a	N0	N0	0	G2	Head & Neck Squamous Cell Carcinoma	NO	TRUE	HNSC	3D2FF6C0-8C03-440D-8EC1-231862BD6713	17A0A479-3B48-4852-AB06-DD33D6F7788A
TCGA-QK-AA3J	Stage I	M0	T1		-25469	hnsc_tcga	Head and Neck Cancer	Head and Neck Squamous Cell Carcinoma	NA	157	15	NA	NA	69	YES		NA	NOT HISPANIC OR LATINO		NA	2014-06-05			C32.9	YES	10	1983-03-01	C32.9	NO	0	NA	NA		NO	NA	No	M0	Stage I	T1	N0	N0	NA	G3	Head & Neck Squamous Cell Carcinoma Basaloid Type	NO	TRUE	HNSC	677C9D22-E518-43AB-9668-A606C35A6EEB	B67C34C3-8E4E-41CC-865D-43EE8C9D3D78
TCGA-QK-AA3K	Stage IVA	MX	T3	NO	-22093	hnsc_tcga	Head and Neck Cancer	Head and Neck Squamous Cell Carcinoma	NA	168	13	NA	NA	60	YES	Positive	NA	NOT HISPANIC OR LATINO	Gross Extension	NA	2014-06-09		Positive	C02.9	YES	140	1970-03-01	C02.9	NO	0	NA	6	Functional (Limited) Neck Dissection	YES	NA	No	MX	Stage IVA	T3	N2b	N2b	NA	G2	Head & Neck Squamous Cell Carcinoma		TRUE	HNSC	09F6C3AB-B799-404A-B301-22B9CAF33E82	9FA5F0EF-89B7-44A0-BED8-F8683D055FE3
TCGA-RS-A6TO	Stage IVA	M0	T4	NO	-30104	hnsc_tcga	Head and Neck Cancer	Head and Neck Squamous Cell Carcinoma	NA	272	29	NA	NA	82	YES	Positive	NA	NOT HISPANIC OR LATINO	Microscopic Extension	NA	2014-03-10		Negative	C06.9	YES	550	1971-03-01	C06.9	NO	0	NA	61	Functional (Limited) Neck Dissection	YES	NA	No	M0	Stage IVA	T4	N2c	N2c	NA	G2	Head & Neck Squamous Cell Carcinoma	NO	TRUE	HNSC	B815FAE9-C595-4C76-ACC6-6D38B9AF9578	56888173-F127-47AF-B9C5-707F91F18FA1
TCGA-RS-A6TP	Stage II	M0	T2	NO	-21393	hnsc_tcga	Head and Neck Cancer	Head and Neck Squamous Cell Carcinoma	0	236	117	NA	NA	58	NO	Close	NA	NOT HISPANIC OR LATINO	Microscopic Extension	NA	2014-03-10		Positive	C09.9	YES	400	1972-03-01	C09.9	NO	0	NA	NA		NO	NA	No	M0	Stage II	T2	N0	N0	0	G3	Head & Neck Squamous Cell Carcinoma	NO	TRUE	HNSC	5436B002-4E4F-4D0F-9566-C0EF4D2D1854	1CE08042-34C7-450E-B1F5-8CDF9BFC5A77
TCGA-T2-A6WX				YES	-27005	hnsc_tcga	Head and Neck Cancer	Head and Neck Squamous Cell Carcinoma	0	NA	1017	NA	209	73	YES	Negative	NA	NOT HISPANIC OR LATINO	No Extranodal Extension	NA	2013-10-30			C04.9	YES	80	1971-03-01	C04.9	NO	0	NA	85	Functional (Limited) Neck Dissection	YES	NA	No	M0	Stage III	T3	N0		0	G1	Head & Neck Squamous Cell Carcinoma	NO	TRUE	HNSC	8B9E81DA-EA22-4F6A-BDB1-281B0EC8A451	F61A9D98-4825-4B59-859D-7844059A90B3
TCGA-T2-A6WZ			T3	NO	-19397	hnsc_tcga	Head and Neck Cancer	Head and Neck Squamous Cell Carcinoma	3.5	NA	406	NA	484	53	YES	Negative	NA	NOT HISPANIC OR LATINO	Microscopic Extension	NA	2013-10-21	Negative		C01	YES	110	1970-03-01	C01.9	NO	0	NA	89	Functional (Limited) Neck Dissection	YES	NA	No	M0	Stage IVA	T3	N2b	N2b	7	G2	Head & Neck Squamous Cell Carcinoma	YES	TRUE	HNSC	93CBDA0F-8454-4127-A6DA-A19DDA345DEB	AE8B275A-9D16-4E9D-BFF8-C6973FBF32DD
TCGA-T2-A6X0			TX		-18114	hnsc_tcga	Head and Neck Cancer	Head and Neck Squamous Cell Carcinoma	0	216	314	NA	NA	49	YES	Negative	NA	NOT HISPANIC OR LATINO	Gross Extension	NA	2013-10-21	Positive		C09.9	YES	50	1970-03-01	C09.9	NO	0	NA	31	Functional (Limited) Neck Dissection	YES	NA	No	M0	Stage IVA	T1	N2a		0	G2	Head & Neck Squamous Cell Carcinoma	NO	TRUE	HNSC	FF38628E-8ABE-44D6-8D3B-7CFE46BD2E35	A4B8631D-80AA-4665-86B4-0CAA7241DA66
TCGA-T2-A6X2	Stage III	MX	T3	NO	-30013	hnsc_tcga	Head and Neck Cancer	Head and Neck Squamous Cell Carcinoma	0	987	880	NA	NA	82	NO	Negative	NA	NOT HISPANIC OR LATINO	No Extranodal Extension	NA	2013-10-22	Negative		C03.9	YES	50	1971-03-01	C03.9	NO	0	NA	53	Functional (Limited) Neck Dissection	YES	NA	No	M0	Stage III	T3	N0	N0	0	G1	Head & Neck Squamous Cell Carcinoma	NO	TRUE	HNSC	731F6967-5A01-40B7-9F88-64D980214BB2	161B6A0E-0B50-41A1-BDF3-BD7666067454
TCGA-T3-A92M	Stage IVA	MX	T4a		-19247	hnsc_tcga	Head and Neck Cancer	Head and Neck Squamous Cell Carcinoma	NA	0	147	NA	NA	52		Negative	NA	NOT HISPANIC OR LATINO	Microscopic Extension	NA	2014-12-31			C32.9	YES	240	1970-03-01	C32.9	NO	0	NA	4	Radical Neck Dissection	YES	NA	No	M0	Stage IVA	T4a	N2c	N2c	NA	G2	Head & Neck Squamous Cell Carcinoma		FALSE	HNSC	DBDEB4CA-F67C-4D89-AF60-88B425EBE461	D22843CB-8A14-4592-B339-A04CF1514205
TCGA-T3-A92N	Stage IVA	MX	T2	NO	-28879	hnsc_tcga	Head and Neck Cancer	Head and Neck Squamous Cell Carcinoma	NA	-2	68	NA	NA	79	NO	Positive	NA	NOT HISPANIC OR LATINO	Microscopic Extension	NA	2014-10-27			C04.9	YES	120	1970-03-01	C04.9	NO	0	NA	31	Radical Neck Dissection	YES	NA	No	M1	Stage IVC	T1	N1	N2c	NA	G3	Head & Neck Squamous Cell Carcinoma		FALSE	HNSC	DB873DBD-D0C0-4A19-80E5-963DCFAF823E	59BE88AF-590B-4852-BC49-C20409A18E83
TCGA-TN-A7HI	Stage IVA	M0	T2	YES	-20666	hnsc_tcga	Head and Neck Cancer	Head and Neck Squamous Cell Carcinoma	NA	146	75	NA	NA	56	YES	Negative	NA	NOT HISPANIC OR LATINO	No Extranodal Extension	NA	2014-01-14	Positive	Positive	C09.9	YES	140	1972-03-01	C09.9	NO	0	NA	49	Modified Radical Neck Dissection	YES	NA	No	M0	Stage I	T1	N0	N2b	NA	G3	Head & Neck Squamous Cell Carcinoma	NO	TRUE	HNSC	896F5DCC-D076-4E1F-AE7C-52D21109DA7B	9808B586-4541-42A8-A72C-0C043FF568B3
TCGA-TN-A7HJ	Stage IVA	M0	T4a	YES	-18809	hnsc_tcga	Head and Neck Cancer	Head and Neck Squamous Cell Carcinoma	NA	184	45	NA	NA	51	YES	Negative	NA	NOT HISPANIC OR LATINO	Microscopic Extension	NA	2014-01-14			C32.9	YES	160	1971-03-01	C32.9	NO	0	NA	121	Modified Radical Neck Dissection	YES	NA	No	M0	Stage III	T3	NX	N2b	NA	G2	Head & Neck Squamous Cell Carcinoma	NO	TRUE	HNSC	B3DBF9AD-9602-4E44-BEAC-1CFA5F8BBA5D	412FE306-9755-4EFE-ABB0-9AF695B5691E
TCGA-TN-A7HL	Stage IVA	M0	T3	YES	-21731	hnsc_tcga	Head and Neck Cancer	Head and Neck Squamous Cell Carcinoma	2	153	45	NA	NA	59	YES	Negative	NA	NOT HISPANIC OR LATINO	Microscopic Extension	NA	2014-01-13	Positive	Positive	C13.9	YES	230	1970-03-01	C13.9	NO	0	NA	71	Modified Radical Neck Dissection	YES	NA	No	M0	Stage IVA	T4a	NX	N2b	4	G2	Head & Neck Squamous Cell Carcinoma	NO	TRUE	HNSC	4B50AEA4-4AD1-4BF6-9CF1-984C28A99C84	9C02FD4A-A29A-4A44-BA96-5ACB6FF11F7F
TCGA-UF-A718	Stage IVA	M0	T4a	NO	-22836	hnsc_tcga	Head and Neck Cancer	Head and Neck Squamous Cell Carcinoma	NA	1326	1494	NA	NA	62		Negative	NA		No Extranodal Extension	NA	2013-12-16			C32.9	YES	120	1970-03-01	C32.9	NO	0	NA	25	Functional (Limited) Neck Dissection	YES	NA	No	M0	Stage IVA	T4a	N0	N0	NA	G2	Head & Neck Squamous Cell Carcinoma		FALSE	HNSC	2135B007-B714-495B-9B30-92010179EC33	8F620B3E-2962-49DA-BCAF-4ECFD9580923
TCGA-UF-A719	Stage II	M0	T2	NO	-19797	hnsc_tcga	Head and Neck Cancer	Head and Neck Squamous Cell Carcinoma	NA	1337	1481	NA	NA	54	NO	Negative	NA		No Extranodal Extension	NA	2013-12-16			C04.9	YES	140	1970-03-01	C04.9	NO	0	NA	13	Functional (Limited) Neck Dissection	YES	NA	No	M0	Stage III	T3	N0	N0	NA	G1	Head & Neck Squamous Cell Carcinoma	NO	FALSE	HNSC	B295A542-F5B3-4B81-84ED-3704B944A8E3	C0CA00A2-A507-4A1E-B00A-FDAE2322CF2B
TCGA-UF-A71A	Stage IVA	M0	T4a	YES	-24623	hnsc_tcga	Head and Neck Cancer	Head and Neck Squamous Cell Carcinoma	NA	NA	NA	NA	86	67	NO	Positive	NA		Gross Extension	NA	2013-11-24			C04.9	YES	NA	1970-03-01	C04.9		0	NA	31	Modified Radical Neck Dissection	YES	NA	No	M0	Stage IVA	T3	N2a	N2c	NA	G1	Head & Neck Squamous Cell Carcinoma	NO	NA	HNSC	2C7F1035-5C8C-4C49-8B9B-2F1233896530
TCGA-UF-A71B	Stage IVA	M0	T4	NO	-18404	hnsc_tcga	Head and Neck Cancer	Head and Neck Squamous Cell Carcinoma	NA	1158	1071	NA	NA	50	YES	Negative	NA		No Extranodal Extension	NA	2014-02-05			C03.9	YES	80	1970-03-01	C03.9	NO	0	NA	11	Functional (Limited) Neck Dissection	YES	NA	No	M0	Stage IVA	T4a	N1	N0	NA	G2	Head & Neck Squamous Cell Carcinoma	NO	FALSE	HNSC	A71B425B-CCD3-42F0-8163-3721CB1794EF	3A4AF2FC-6443-4644-9DA0-FEE722E6D5C6
TCGA-UF-A71D	Stage IVA	M0	T4a	NO	-19747	hnsc_tcga	Head and Neck Cancer	Head and Neck Squamous Cell Carcinoma	NA	986	950	NA	NA	54	YES	Negative	NA		No Extranodal Extension	NA	2014-02-05			C32.9	YES	120	1970-03-01	C32.9	NO	0	NA	42	Functional (Limited) Neck Dissection	YES	NA	No	M0	Stage IVA	T4a	N1	N0	NA	G2	Head & Neck Squamous Cell Carcinoma	NO	FALSE	HNSC	32AAC152-322B-4D7F-A78B-448FECDF17BF	297EA792-1A29-44DB-A14B-38513B50826F
TCGA-UF-A71E	Stage IVA	M0	T4a	YES	-23071	hnsc_tcga	Head and Neck Cancer	Head and Neck Squamous Cell Carcinoma	NA	1090	1004	NA	NA	63	YES	Negative	NA		No Extranodal Extension	NA	2014-02-05			C04.9	YES	190	1970-03-01	C04.9	NO	0	NA	48	Functional (Limited) Neck Dissection	YES	NA	No	M0	Stage IVA	T4	N0	N0	NA	G3	Head & Neck Squamous Cell Carcinoma Basaloid Type	NO	FALSE	HNSC	119EA204-792B-49EC-8FD4-EB88C4F91042	94DD4787-2EE1-4346-81E0-121CE63DFAB1
TCGA-UF-A7J9	Stage IVA	M0	T4a	NO	-27459	hnsc_tcga	Head and Neck Cancer	Head and Neck Squamous Cell Carcinoma	33	1043	945	NA	NA	75	YES	Negative	NA		No Extranodal Extension	NA	2014-02-02			C32.9	YES	60	1970-03-01	C32.9	NO	0	NA	18	Functional (Limited) Neck Dissection	YES	NA	No	M0	Stage IVA	T4a	N0	N0	7	G2	Head & Neck Squamous Cell Carcinoma	NO	FALSE	HNSC	82C47F60-B863-45F9-82DC-72D89753F4B1	5DF6C457-BAEF-451D-B1CF-EB7FA6ADC602
TCGA-UF-A7JA	Stage IVA	M0	T4a	YES	-24121	hnsc_tcga	Head and Neck Cancer	Head and Neck Squamous Cell Carcinoma	NA	1894	1837	NA	NA	66	YES	Negative	NA		No Extranodal Extension	NA	2014-02-02			C06.0	YES	70	1970-03-01	C06.0	NO	0	NA	14	Functional (Limited) Neck Dissection	YES	NA	No	M0	Stage IVA	T4a	N1	N1	NA	G2	Head & Neck Squamous Cell Carcinoma	NO	FALSE	HNSC	97C3C5DC-5540-4713-805E-4D98FD8C03AD	17D8E837-F5E2-4CE4-98D9-0B96317D3413
TCGA-UF-A7JC	Stage IVA	M0	T3	YES	-15452	hnsc_tcga	Head and Neck Cancer	Head and Neck Squamous Cell Carcinoma	NA	484	482	NA	NA	42	YES	Positive	NA		Gross Extension	NA	2014-02-02			C04.9	YES	240	1970-03-01	C04.9	NO	0	NA	37	Functional (Limited) Neck Dissection	YES	NA	No	M0	Stage III	T3	N1	N2b	NA	G1	Head & Neck Squamous Cell Carcinoma	YES	FALSE	HNSC	545C9F09-DF14-4302-B131-519D141438D1	2B3FB3D2-87AD-4768-AC41-C76C9FED3ACE
TCGA-UF-A7JD	Stage IVA	M0	T4	YES	-26101	hnsc_tcga	Head and Neck Cancer	Head and Neck Squamous Cell Carcinoma	NA	653	576	NA	NA	71	YES	Positive	NA		Gross Extension	NA	2014-03-17			C06.0	YES	120	1970-03-01	C06.0	NO	0	NA	25	Functional (Limited) Neck Dissection	YES	NA	No	M0	Stage IVA	T4a	N0	N2b	NA	G3	Head & Neck Squamous Cell Carcinoma	NO	FALSE	HNSC	D947828F-D62F-426B-9710-3C93A7AEF05B	D3FD433A-9522-409F-8C09-3A90E2EF6E26
TCGA-UF-A7JF	Stage IVA	M0	T4a	NO	-29468	hnsc_tcga	Head and Neck Cancer	Head and Neck Squamous Cell Carcinoma	NA	1266	1219	NA	NA	80	YES	Positive	NA		No Extranodal Extension	NA	2014-02-02			C32.9	YES	70	1970-03-01	C32.9	NO	0	NA	66	Functional (Limited) Neck Dissection	YES	NA	No	M0	Stage IVA	T4a	N2b	N2a	NA	G2	Head & Neck Squamous Cell Carcinoma	NO	FALSE	HNSC	3BD2FCEE-5B16-49F3-A717-F1E106BBC12F	F4E12699-7E71-42BA-994A-C3A9A71A95CB
TCGA-UF-A7JH	Stage IVA	M0	T4a	NO	-21558	hnsc_tcga	Head and Neck Cancer	Head and Neck Squamous Cell Carcinoma	NA	469	385	NA	NA	59	YES	Negative	NA		No Extranodal Extension	NA	2014-02-02			C32.9	YES	120	1970-03-01	C32.9	NO	0	NA	24	Functional (Limited) Neck Dissection	YES	NA	No	M0	Stage IVA	T4a	N0	N0	NA	G1	Head & Neck Squamous Cell Carcinoma	NO	FALSE	HNSC	0ABE0B8F-FD93-43E8-B78F-48A7C3F96868	980726E2-9E0C-4212-B5AA-69E139FC3BE7
TCGA-UF-A7JJ	Stage IVA	M0	T4a	NO	-25201	hnsc_tcga	Head and Neck Cancer	Head and Neck Squamous Cell Carcinoma	NA	214	87	NA	NA	68	YES	Negative	NA		No Extranodal Extension	NA	2014-02-02			C32.9	YES	200	1971-03-01	C32.9	NO	0	NA	27	Functional (Limited) Neck Dissection	YES	NA	No	M0	Stage IVA	T4a	N0	N0	NA	G1	Head & Neck Squamous Cell Carcinoma	NO	FALSE	HNSC	68F612B7-33B4-4CA4-B012-439BFD598888	DE8517E0-D7AD-41A2-9468-BDF0106C905C
TCGA-UF-A7JK	Stage IVA	M0	T4a	YES	-21696	hnsc_tcga	Head and Neck Cancer	Head and Neck Squamous Cell Carcinoma	NA	NA	1302	NA	424	59	YES	Positive	NA		Gross Extension	NA	2014-02-02			C32.9	YES	50	1971-03-01	C32.9	NO	0	NA	19	Functional (Limited) Neck Dissection	YES	NA	No	M0	Stage IVA	T4a	N0	N2b	NA	G2	Head & Neck Squamous Cell Carcinoma	YES	FALSE	HNSC	1CA54115-93A3-4C0E-ABF0-915B4BBFF10C	90E4A976-0D97-47EF-AA29-295C2AFEB31B
TCGA-UF-A7JO	Stage IVA	M0	T4a	NO	-28951	hnsc_tcga	Head and Neck Cancer	Head and Neck Squamous Cell Carcinoma	NA	NA	1658	NA	631	79	YES	Negative	NA		No Extranodal Extension	NA	2014-02-02			C04.9	YES	110	1970-03-01	C04.9	NO	0	NA	27	Functional (Limited) Neck Dissection	YES	NA	No	M0	Stage IVA	T4a	N0	N0	NA	G2	Head & Neck Squamous Cell Carcinoma	YES	FALSE	HNSC	55DEAB98-29C3-45A1-BC13-BCE3F13AD481	DE04D812-9F63-42D8-894A-27E393BBDDF8
TCGA-UF-A7JS	Stage IVA	M0	T4a	YES	-21676	hnsc_tcga	Head and Neck Cancer	Head and Neck Squamous Cell Carcinoma	NA	413	311	NA	NA	59	YES	Positive	NA		No Extranodal Extension	NA	2014-02-02			C02.9	YES	170	1970-03-01	C02.9	NO	0	NA	54	Modified Radical Neck Dissection	YES	NA	No	M0	Stage IVA	T3	N2b	N2b	NA	G2	Head & Neck Squamous Cell Carcinoma	NO	FALSE	HNSC	1BC03593-5AB6-4082-B157-7EA456845E28	E1DEA476-9332-4982-9DEF-2839317ED920
TCGA-UF-A7JT	Stage IVA	M0	T4a	NO	-26375	hnsc_tcga	Head and Neck Cancer	Head and Neck Squamous Cell Carcinoma	NA	NA	1631	NA	993	72	YES	Negative	NA		No Extranodal Extension	NA	2014-02-02			C04.9	YES	190	1970-03-01	C04.9	NO	0	NA	13	Functional (Limited) Neck Dissection	YES	NA	No	M0	Stage IVA	T4a	N0	N0	NA	G3	Head & Neck Squamous Cell Carcinoma	YES	FALSE	HNSC	12DA9527-CF33-46C6-90CF-65478FF15CF9	71987CF8-46AE-4C5A-B82B-E999B3713710
TCGA-UF-A7JV	Stage IVA	M0	T4a	NO	-22985	hnsc_tcga	Head and Neck Cancer	Head and Neck Squamous Cell Carcinoma	NA	NA	835	NA	90	62	NO	Close	NA		No Extranodal Extension	NA	2014-02-02			C13.9	YES	90	1970-03-01	C13.9	NO	0	NA	28	Functional (Limited) Neck Dissection	YES	NA	No	M0	Stage IVA	T4a	N2c	N2b	NA	G2	Head & Neck Squamous Cell Carcinoma	YES	FALSE	HNSC	12D94C6E-323F-450B-B510-F2AB4671E0FA	A1D62BA6-696C-4693-9067-D4226A4E6316
TCGA-UP-A6WW				YES	-21427	hnsc_tcga	Head and Neck Cancer	Head and Neck Squamous Cell Carcinoma	3	457	64	NA	NA	58	YES	Negative	NA	HISPANIC OR LATINO	Microscopic Extension	NA	2014-08-28			C02.9	YES	200	1970-03-01	C02.9	NO	0	NA	53	Functional (Limited) Neck Dissection	YES	NA	No	MX	Stage IVA	T2	N2c		7	G2	Head & Neck Squamous Cell Carcinoma	NO	TRUE	HNSC	F88EC55C-4C1E-4593-9C89-1981F220C0F8	2527511B-0217-4F82-B7B8-42787E206532
TCGA-WA-A7GZ			T2		-21207	hnsc_tcga	Head and Neck Cancer	Head and Neck Squamous Cell Carcinoma	NA	335	258	NA	NA	58	YES	Negative	NA	NOT HISPANIC OR LATINO		NA	2014-01-14			C04.9	YES	60	1971-03-01	C04.9	NO	0	NA	NA	Functional (Limited) Neck Dissection	YES	NA	No	M0	Stage II	T2	N0	N0	NA	G2	Head & Neck Squamous Cell Carcinoma	NO	FALSE	HNSC	F9E82D62-FAFC-45B0-97CF-D1A4A3C884A1	6178BFF7-DEC1-44F6-BA74-6D3363FE341B
TCGA-WA-A7H4	Stage II		T2		-25363	hnsc_tcga	Head and Neck Cancer	Head and Neck Squamous Cell Carcinoma	NA	153	76	NA	NA	69	NO	Negative	NA	NOT HISPANIC OR LATINO		NA	2014-01-14			C02.9	YES	NA	1971-03-01	C02.9	NO	0	NA	NA	Functional (Limited) Neck Dissection	YES	NA	No	M0	Stage II	T2	N0	N0	NA	G3	Head & Neck Squamous Cell Carcinoma	NO	FALSE	HNSC	4199C571-F20F-4873-AFD3-5393F2F8D2DB	2271AF5D-7554-4447-B6E5-44C96ACEDD26
TCGA-HD-A634	Stage IVA	MX	T3	YES	-20810	hnsc_tcga	Head and Neck Cancer	Head and Neck Squamous Cell Carcinoma	NA	10	41	NA	NA	56		Close	NA	NOT HISPANIC OR LATINO	Microscopic Extension	NA	2013-09-20		Positive	C09.9	YES	50	8070-03-01	C09.9	NO	0	NA	22	Modified Radical Neck Dissection	YES	NA	No	M0	Stage III	T3	N1	N2b	NA	G3	Head & Neck Squamous Cell Carcinoma	NO	FALSE	HNSC	A0B136FB-3A0A-4411-8907-4CA775C7D04E	1BAE9A44-1CE3-45B1-9902-40FAEBA58120
[truncated: 46 more columns]
